# Supplementary material for: Vitamin B1-catalyzed aerobic oxidative esterification of aromatic aldehydes with alcohols
Source: Royal Society of Chemistry journal article supplement (doi:10.1039/d1ra05134b), 2021-01-01

## Supporting Information

### Vitamin B1-Catalyzed Aerobic Oxidative Esterification of Aromatic Aldehydes with Alcohols

Xin-Long Luo,<sup>a,c</sup> Danhua Ge,<sup>a,c</sup> Zi-Lun Yu,<sup>a</sup> Xue-Qiang Chu,<sup>a\*</sup> and Pei Xu<sup>b\*</sup>

<sup>a</sup> Institute of Advanced Synthesis, School of Chemistry and Molecular Engineering, Nanjing Tech University, Nanjing 211816, China. E-mail: xueqiangchu@njtech.edu.cn.

<sup>b</sup> Jiangsu Key Laboratory of New Drug Research and Clinical Pharmacy, School of Pharmacy, Xuzhou Medical University, Xuzhou 221004, China. E-mail: xupei@xzhmu.edu.cn.

<sup>c</sup> X.-L. Luo and D. Ge contributed equally to this work.

#### Table of Contents

|                                                                                                                   |          |
|-------------------------------------------------------------------------------------------------------------------|----------|
| General information                                                                                               | page S2  |
| General procedure of Vitamin B1-catalyzed aerobic oxidative esterification for the synthesis of products <b>3</b> | page S2  |
| General procedure for the scale-up synthesis of product <b>3aa</b>                                                | page S2  |
| Mechanistic studies                                                                                               | page S3  |
| Characterization data for products                                                                                | page S3  |
| References                                                                                                        | page S11 |
| <sup>1</sup> H, <sup>19</sup> F, and <sup>13</sup> C NMR spectra of products                                      | page S12 |

## General information

Unless otherwise stated, all reagents were purchased from commercial suppliers and used without further purification. All reactions were carried out under air atmosphere using undistilled solvent. Melting points were recorded on an Electrothermal digital melting point apparatus.  $^1\text{H}$ ,  $^{19}\text{F}$ , and  $^{13}\text{C}$  NMR spectra were recorded in  $\text{CDCl}_3$  on Bruker Avance or Joel 300 or 400 MHz spectrometers. The chemical shifts ( $\delta$ ) are reported in ppm and coupling constants ( $J$ ) in Hz. High resolution mass spectra (HRMS) were obtained using a commercial apparatus (ESI Source). Column chromatography was generally performed on silica gel (300-400 mesh) and reactions were monitored by thin layer chromatography (TLC) using UV light to visualize the course of the reactions.

## General procedure of Vitamin B1-catalyzed aerobic oxidative esterification for the synthesis of products 3

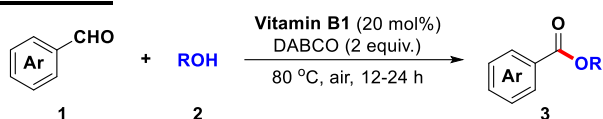

**Method 1:** A solution of aldehyde (1 mmol), vitamin B1 (60.2 mg, 0.2 mmol), and triethylenediamine (DABCO, 224.3 mg, 2 mmol) in alcohol (2 mL) was stirred at 80 °C under air for 12-24 h. The reaction was then quenched by saturated  $\text{NH}_4\text{Cl}$  solution (20 mL) and extracted with EtOAc (20 mL x 3). The organic layer was washed with saturated brine twice, dried over  $\text{MgSO}_4$ , filtered, and concentrated under reduced pressure. The crude product was purified by flash column chromatography (300-400 mesh) using petroleum ether/ethyl acetate (100/1 ~ 2/1) as eluent to afford the pure products 3.

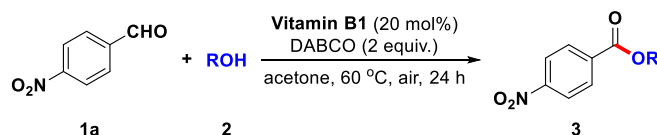

**Method 2:** A solution of 4-nitrobenzaldehyde (453.4 mg, 3 mmol), alcohol (1 mmol), vitamin B1 (60.2 mg, 0.2 mmol), and triethylenediamine (DABCO, 224.3 mg, 2 mmol) in acetone (2 mL) was stirred at 60 °C under air for 24 h. The reaction was then quenched by saturated  $\text{NH}_4\text{Cl}$  solution (20 mL) and extracted with EtOAc (20 mL x 3). The organic layer was washed with saturated brine twice, dried over  $\text{MgSO}_4$ , filtered, and concentrated under reduced pressure. The crude product was purified by flash column chromatography (300-400 mesh) using petroleum ether/ethyl acetate (100/1 ~ 2/1) as eluent to afford the pure products 3.

## General procedure for the scale-up synthesis of product 3aa

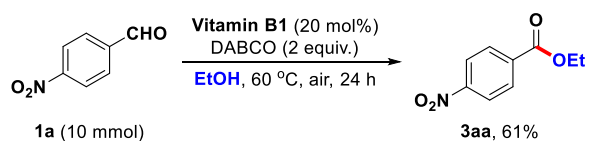

A solution of 4-nitrobenzaldehyde (1.51 g, 10 mmol), vitamin B1 (601.6 mg, 2 mmol), and triethylenediamine (DABCO, 2.24 g, 20 mmol) in EtOH (20 mL) was stirred at 80 °C under air for

24 h. The reaction solvent was removed under reduced pressure, then the reaction mixture was quenched by saturated  $\text{NH}_4\text{Cl}$  solution (20 mL) and extracted with EtOAc (20 mL x 3). The organic layer was washed with saturated brine twice, dried over  $\text{MgSO}_4$ , filtered, and concentrated under reduced pressure. The crude product was purified by flash column chromatography (300-400 mesh) using petroleum ether/ethyl acetate (100/1 ~ 2/1) as eluent to afford the pure products **3aa** (1.19 g, 61% yield).

## Mechanistic studies

### 1) Under $\text{N}_2$ atmosphere

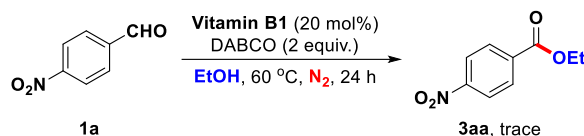

A solution of 4-nitrobenzaldehyde (151.1 mg, 1 mmol), vitamin B1 (60.2 mg, 0.2 mmol), and triethylenediamine (DABCO, 224.3 mg, 2 mmol) in EtOH (2 mL) was stirred at 80 °C under  $\text{N}_2$  for 24 h. **Only trace amounts of desired products 3aa were observed. This result suggested that  $\text{O}_2$  is important for the desired esterification.**

### 2) Radical trapping experiment

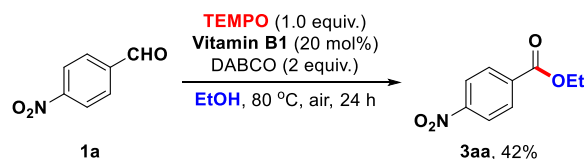

A solution of 4-nitrobenzaldehyde (151.1 mg, 1 mmol), vitamin B1 (60.2 mg, 0.2 mmol), triethylenediamine (DABCO, 224.3 mg, 2 mmol), and 2,2,6,6-tetramethylpiperidinoxy (TEMPO, 156.3 mg, 1 mmol) in EtOH (2 mL) was stirred at 80 °C under air for 24 h. The reaction was then quenched by saturated  $\text{NH}_4\text{Cl}$  solution (20 mL) and extracted with EtOAc (20 mL x 3). The organic layer was washed with saturated brine twice, dried over  $\text{MgSO}_4$ , filtered, and concentrated under reduced pressure. The crude product was purified by flash column chromatography (300-400 mesh) using petroleum ether/ethyl acetate (100/1 ~ 20/1) as eluent to afford the pure product **3aa** (82.0 mg, 42% yield). **This result suggested that radical intermediate was not involved in the reaction.**

## Characterization data for products

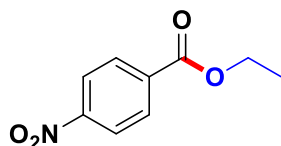

**Ethyl 4-nitrobenzoate (3aa)**<sup>[1]</sup>: Yield = 65% (126.9 mg). Orange solid.

<sup>1</sup>H NMR (400 MHz, Chloroform-*d*):  $\delta$  8.28 (d,  $J$  = 8.5 Hz, 2H), 8.21 (d,  $J$  = 8.6 Hz, 2H), 4.43 (q,  $J$  = 7.1 Hz, 2H), 1.42 (t,  $J$  = 7.1 Hz, 3H) ppm.

<sup>13</sup>C NMR (75 MHz, Chloroform-*d*):  $\delta$  164.6, 150.4, 135.8, 130.6, 123.4, 61.9, 14.2 ppm.

**HRMS m/z:** calcd for C<sub>9</sub>H<sub>10</sub>NO<sub>4</sub> [M+H]<sup>+</sup> 196.0604, found: 196.0610.

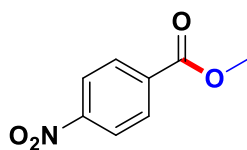

**Methyl 4-nitrobenzoate (3ab)**<sup>[1]</sup>: Yield = 63% (114.1 mg). Orange solid.

**<sup>1</sup>H NMR (400 MHz, Chloroform-*d*):** δ 8.32 – 8.26 (m, 2H), 8.24 – 8.17 (m, 2H), 3.97 (s, 3H) ppm.

**<sup>13</sup>C NMR (75 MHz, Chloroform-*d*):** δ 165.1, 150.5, 135.4, 130.7, 123.5, 52.8 ppm.

**HRMS m/z:** calcd for C<sub>8</sub>H<sub>8</sub>NO<sub>4</sub> [M+H]<sup>+</sup> 182.0448, found: 182.0453.

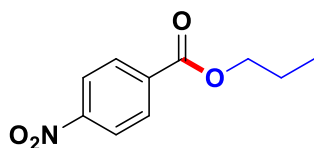

**Propyl 4-nitrobenzoate (3ac)**<sup>[2]</sup>: Yield = 52% (108.8 mg). Orange solid.

**<sup>1</sup>H NMR (400 MHz, Chloroform-*d*):** δ 8.32 – 8.25 (m, 2H), 8.20 (d, *J* = 8.5 Hz, 2H), 4.33 (t, *J* = 6.7 Hz, 2H), 1.82 (h, *J* = 7.1 Hz, 2H), 1.04 (t, *J* = 7.4 Hz, 3H) ppm.

**<sup>13</sup>C NMR (75 MHz, Chloroform-*d*):** δ 164.7, 150.4, 135.8, 130.6, 123.5, 67.4, 22.0, 10.4 ppm.

**HRMS m/z:** calcd for C<sub>10</sub>H<sub>12</sub>NO<sub>4</sub> [M+H]<sup>+</sup> 210.0761, found: 210.0766.

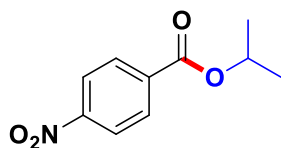

**Isopropyl 4-nitrobenzoate (3ad)**<sup>[3]</sup>: Yield = 53% (110.9 mg). Orange solid.

**<sup>1</sup>H NMR (400 MHz, Chloroform-*d*):** δ 8.27 (d, *J* = 8.4 Hz, 2H), 8.19 (d, *J* = 8.5 Hz, 2H), 5.28 (hept, *J* = 6.3 Hz, 1H), 1.40 (d, *J* = 6.3 Hz, 6H) ppm.

**<sup>13</sup>C NMR (75 MHz, Chloroform-*d*):** δ 164.1, 150.4, 136.2, 130.6, 123.4, 69.7, 21.8 ppm.

**HRMS m/z:** calcd for C<sub>10</sub>H<sub>12</sub>NO<sub>4</sub> [M+H]<sup>+</sup> 210.0761, found: 210.0765.

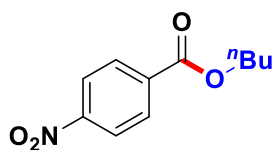

**Butyl 4-nitrobenzoate (3ae)**<sup>[2]</sup>: Yield = 59% (131.7 mg). Orange solid.

**<sup>1</sup>H NMR (400 MHz, Chloroform-*d*):** δ 8.29 (d, *J* = 8.6 Hz, 2H), 8.21 (d, *J* = 8.6 Hz, 2H), 4.38 (t, *J* = 6.6 Hz, 2H), 1.78 (p, *J* = 6.9 Hz, 2H), 1.49 (h, *J* = 7.4 Hz, 2H), 0.99 (t, *J* = 7.4 Hz, 3H) ppm.

**<sup>13</sup>C NMR (75 MHz, Chloroform-*d*):** δ 164.7, 150.4, 135.8, 130.6, 123.5, 65.8, 30.6, 19.2, 13.7 ppm.

**HRMS m/z:** calcd for C<sub>11</sub>H<sub>14</sub>NO<sub>4</sub> [M+H]<sup>+</sup> 224.0917, found: 224.0923.

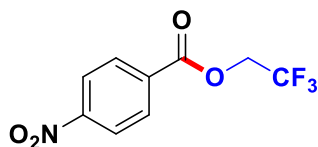

**2,2,2-Trifluoroethyl 4-nitrobenzoate (3af)**<sup>[4]</sup>: Yield = 18% (44.8 mg). Light orange solid.

**<sup>1</sup>H NMR (400 MHz, Chloroform-*d*):** δ 8.36 – 8.32 (m, 2H), 8.29 – 8.25 (m, 2H), 4.77 (q, *J* = 8.3

Hz, 2H) ppm.

<sup>19</sup>F NMR (376 MHz, Chloroform-*d*):  $\delta$  -73.45 (t,  $J$  = 8.2 Hz, 3F).

<sup>13</sup>C NMR (101 MHz, Chloroform-*d*):  $\delta$  163.1, 151.0, 133.6, 131.2, 123.8, 122.8 (q,  $J$  = 275.4 Hz), 61.3 (q,  $J$  = 36.7 Hz) ppm.

HRMS  $m/z$ : calcd for C<sub>9</sub>H<sub>7</sub>F<sub>3</sub>NO<sub>4</sub> [M+H]<sup>+</sup> 250.0322, found: 250.0327.

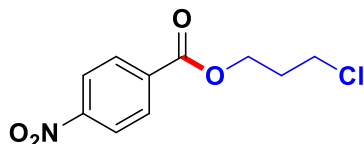

**3-Chloropropyl 4-nitrobenzoate (3ag)**<sup>[5]</sup>: Yield = 59% (143.7 mg). Light yellow oil.

<sup>1</sup>H NMR (401 MHz, Chloroform-*d*):  $\delta$  8.33 – 8.25 (m, 2H), 8.23 – 8.17 (m, 2H), 4.54 (t,  $J$  = 6.1 Hz, 2H), 3.70 (t,  $J$  = 6.3 Hz, 2H), 2.27 (p,  $J$  = 6.2 Hz, 2H) ppm.

<sup>13</sup>C NMR (101 MHz, Chloroform-*d*):  $\delta$  164.5, 150.6, 135.3, 130.7, 123.6, 62.7, 41.0, 31.4 ppm.

HRMS  $m/z$ : calcd for C<sub>10</sub>H<sub>11</sub>ClNO<sub>4</sub> [M+H]<sup>+</sup> 244.0371, found: 244.0377.

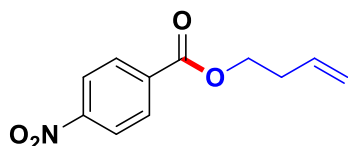

**But-3-en-1-yl 4-nitrobenzoate (3ah)**<sup>[6]</sup>: Yield = 45% (99.5 mg). Orange oil.

<sup>1</sup>H NMR (401 MHz, Chloroform-*d*):  $\delta$  8.27 – 8.21 (m, 2H), 8.19 – 8.13 (m, 2H), 5.89 – 5.76 (m, 1H), 5.20 – 5.04 (m, 2H), 4.39 (t,  $J$  = 6.6 Hz, 2H), 2.56 – 2.46 (m, 2H) ppm.

<sup>13</sup>C NMR (101 MHz, Chloroform-*d*):  $\delta$  164.5, 150.4, 135.6, 133.6, 130.6, 123.4, 117.6, 64.7, 32.9 ppm.

HRMS  $m/z$ : calcd for C<sub>11</sub>H<sub>12</sub>NO<sub>4</sub> [M+H]<sup>+</sup> 222.0761, found: 222.0766.

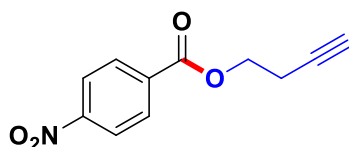

**But-3-yn-1-yl 4-nitrobenzoate (3ai)**<sup>[7]</sup>: Yield = 44% (96.4 mg). Orange solid.

<sup>1</sup>H NMR (401 MHz, Chloroform-*d*):  $\delta$  8.30 – 8.25 (m, 2H), 8.24 – 8.18 (m, 2H), 4.50 – 4.40 (m, 2H), 2.73 – 2.65 (m, 2H), 2.04 (t,  $J$  = 2.7 Hz, 1H) ppm.

<sup>13</sup>C NMR (101 MHz, Chloroform-*d*):  $\delta$  164.3, 150.5, 135.2, 130.7, 123.5, 79.6, 70.3, 63.3, 18.9 ppm.

HRMS  $m/z$ : calcd for C<sub>11</sub>H<sub>10</sub>NO<sub>4</sub> [M+H]<sup>+</sup> 220.0604, found: 220.0611.

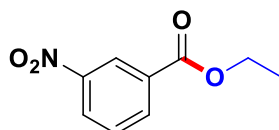

**Ethyl 3-nitrobenzoate (3ba)**<sup>[8]</sup>: Yield = 50% (97.6 mg). Light white solid.

<sup>1</sup>H NMR (401 MHz, Chloroform-*d*):  $\delta$  8.87 – 8.77 (m, 1H), 8.43 – 8.29 (m, 2H), 7.67 – 7.59 (m, 1H), 4.48 – 4.37 (m, 2H), 1.45 – 1.38 (m, 3H) ppm.

<sup>13</sup>C NMR (101 MHz, Chloroform-*d*):  $\delta$  164.4, 148.2, 135.2, 132.1, 129.5, 127.2, 124.4, 61.9, 14.2 ppm.

HRMS  $m/z$ : calcd for C<sub>9</sub>H<sub>10</sub>NO<sub>4</sub> [M+H]<sup>+</sup> 196.0604, found: 196.0610.

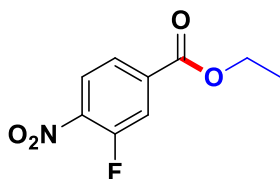

**Ethyl 3-fluoro-4-nitrobenzoate (3ca):** Yield = 47% (100.2 mg). Orange oil.

**<sup>1</sup>H NMR (401 MHz, Chloroform-*d*):**  $\delta$  8.15 – 8.03 (m, 1H), 8.00 – 7.85 (m, 2H), 4.42 (q,  $J$  = 7.2 Hz, 2H), 1.41 (t,  $J$  = 7.2 Hz, 3H) ppm.

**<sup>19</sup>F NMR (377 MHz, Chloroform-*d*):**  $\delta$  -116.58 ppm.

**<sup>13</sup>C NMR (101 MHz, Chloroform-*d*):**  $\delta$  163.5, 155.0 (d,  $J$  = 263.7 Hz), 139.8 (d,  $J$  = 7.7 Hz), 137.0 (d,  $J$  = 7.7 Hz), 126.1 (d,  $J$  = 2.7 Hz), 125.4 (d,  $J$  = 2.7 Hz), 119.6 (d,  $J$  = 22.2 Hz), 62.3, 14.1 ppm.

**HRMS  $m/z$ :** calcd for C<sub>9</sub>H<sub>9</sub>FNO<sub>4</sub> [M+H]<sup>+</sup> 214.0510, found: 214.0516.

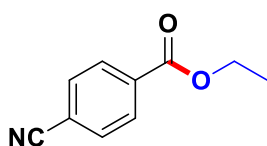

**Ethyl 4-cyanobenzoate (3da)<sup>[9]</sup>:** Yield = 40% (70.1 mg). White solid.

**<sup>1</sup>H NMR (401 MHz, Chloroform-*d*):**  $\delta$  8.17 – 8.08 (m, 2H), 7.77 – 7.68 (m, 2H), 4.40 (q,  $J$  = 7.1 Hz, 2H), 1.40 (t,  $J$  = 7.1 Hz, 3H) ppm.

**<sup>13</sup>C NMR (101 MHz, Chloroform-*d*):**  $\delta$  164.9, 134.2, 132.1, 130.0, 118.0, 116.2, 61.7, 14.2 ppm.

**HRMS  $m/z$ :** calcd for C<sub>10</sub>H<sub>10</sub>NO<sub>2</sub> [M+H]<sup>+</sup> 176.0706, found: 176.0712.

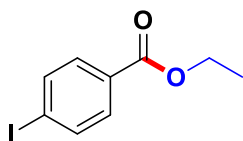

**Ethyl 4-iodobenzoate (3ea)<sup>[9]</sup>:** Yield = 33% (91.1 mg). Yellow oil.

**<sup>1</sup>H NMR (401 MHz, Chloroform-*d*):**  $\delta$  7.84 – 7.68 (m, 4H), 4.36 (q,  $J$  = 7.2 Hz, 2H), 1.38 (t,  $J$  = 7.1 Hz, 3H) ppm.

**<sup>13</sup>C NMR (101 MHz, Chloroform-*d*):**  $\delta$  166.1, 137.6, 131.0, 129.9, 100.5, 61.2, 14.3 ppm.

**HRMS  $m/z$ :** calcd for C<sub>9</sub>H<sub>10</sub>IO<sub>2</sub> [M+H]<sup>+</sup> 276.9720, found: 276.9725.

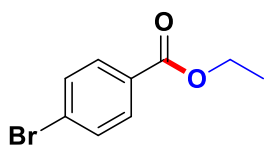

**Ethyl 4-bromobenzoate (3fa)<sup>[9]</sup>:** Yield = 25% (57.3 mg). Yellow solid.

**<sup>1</sup>H NMR (401 MHz, Chloroform-*d*):**  $\delta$  7.95 – 7.87 (m, 2H), 7.60 – 7.54 (m, 2H), 4.37 (q,  $J$  = 7.2 Hz, 2H), 1.39 (t,  $J$  = 7.1 Hz, 3H) ppm.

**<sup>13</sup>C NMR (101 MHz, Chloroform-*d*):**  $\delta$  165.9, 131.6, 131.1, 129.4, 127.9, 61.2, 14.3 ppm.

**HRMS  $m/z$ :** calcd for C<sub>9</sub>H<sub>10</sub>BrO<sub>2</sub> [M+H]<sup>+</sup> 228.9859, found: 228.9864.

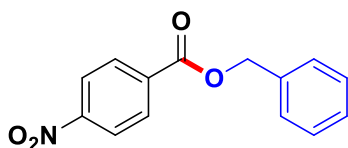

**Benzyl 4-nitrobenzoate (3aj)**<sup>[5]</sup>: Yield = 60% (159.2 mg). Yellow solid.

**<sup>1</sup>H NMR (401 MHz, Chloroform-*d*)**: δ 8.30 – 8.18 (m, 4H), 7.49 – 7.32 (m, 5H), 5.40 (s, 2H) ppm.

**<sup>13</sup>C NMR (101 MHz, Chloroform-*d*)**: δ 164.5, 150.5, 135.4, 135.2, 130.8, 128.7, 128.6, 128.4, 123.5, 67.6 ppm.

**HRMS m/z**: calcd for C<sub>14</sub>H<sub>12</sub>NO<sub>4</sub> [M+H]<sup>+</sup> 258.0761, found: 258.0766.

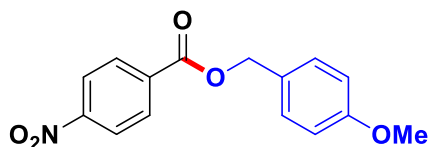

**4-methoxybenzyl 4-nitrobenzoate (3ak)**<sup>[10]</sup>: Yield = 65% (186.7 mg). Yellow solid.

**<sup>1</sup>H NMR (400 MHz, Chloroform-*d*)**: δ 8.29 – 8.24 (m, 2H), 8.23 – 8.18 (m, 2H), 7.42 – 7.37 (m, 2H), 6.96 – 6.88 (m, 2H), 5.34 (s, 2H), 3.82 (s, 3H) ppm.

**<sup>13</sup>C NMR (75 MHz, Chloroform-*d*)**: δ 164.6, 159.9, 150.4, 135.6, 130.7, 130.4, 127.2, 123.5, 114.0, 67.5, 55.3 ppm.

**HRMS m/z**: calcd for C<sub>15</sub>H<sub>14</sub>NO<sub>5</sub> [M+H]<sup>+</sup> 288.0866, found: 288.0872.

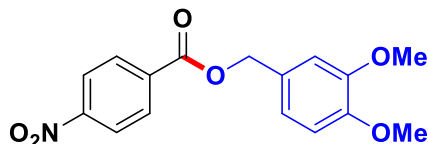

**3,4-Dimethoxybenzyl 4-nitrobenzoate (3al)**: Yield = 71% (225.3 mg). Yellow solid. M.p. = 105.3-106.8 °C.

**<sup>1</sup>H NMR (401 MHz, Chloroform-*d*)**: δ 8.22 – 8.09 (m, 4H), 7.02 – 6.91 (m, 2H), 6.83 (dd, *J* = 8.2, 2.1 Hz, 1H), 5.28 (d, *J* = 2.0 Hz, 2H), 3.85 (s, 3H), 3.82 (s, 3H) ppm.

**<sup>13</sup>C NMR (101 MHz, Chloroform-*d*)**: δ 164.3, 150.2, 149.1, 148.8, 135.3, 130.5, 127.4, 123.2, 121.4, 111.7, 110.8, 67.5, 55.6, 55.6 ppm.

**HRMS m/z**: calcd for C<sub>16</sub>H<sub>16</sub>NO<sub>6</sub> [M+H]<sup>+</sup> 318.0972, found: 318.0977.

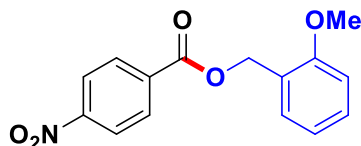

**2-Methoxybenzyl 4-nitrobenzoate (3am)**: Yield = 72% (206.8 mg). White solid. M.p. = 77.3-78.4 °C.

**<sup>1</sup>H NMR (400 MHz, Chloroform-*d*)**: δ 8.30 – 8.15 (m, 4H), 7.44 – 7.38 (m, 1H), 7.37 – 7.31 (m, 1H), 6.98 (t, *J* = 7.5 Hz, 1H), 6.93 (d, *J* = 8.2 Hz, 1H), 5.45 (s, 2H), 3.86 (s, 3H) ppm.

**<sup>13</sup>C NMR (101 MHz, Chloroform-*d*)**: δ 164.5, 157.5, 150.3, 135.6, 130.6, 129.9, 129.7, 123.4, 123.3, 120.3, 110.4, 63.0, 55.3 ppm.

**HRMS m/z**: calcd for C<sub>15</sub>H<sub>14</sub>NO<sub>5</sub> [M+H]<sup>+</sup> 288.0866, found: 288.0872.

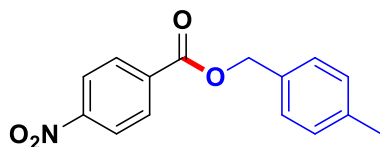

**4-Methylbenzyl 4-nitrobenzoate (3an)**<sup>[11]</sup>: Yield = 62% (168.2 mg). White solid.

**<sup>1</sup>H NMR (400 MHz, Chloroform-*d*)**: δ 8.27 (d, *J* = 8.7 Hz, 2H), 8.22 (d, *J* = 8.8 Hz, 2H), 7.35 (d,

$J = 7.7$  Hz, 2H), 7.22 (d,  $J = 7.7$  Hz, 2H), 5.36 (s, 2H), 2.38 (s, 3H) ppm.

$^{13}\text{C}$  NMR (101 MHz, Chloroform-*d*):  $\delta$  164.5, 150.4, 138.6, 135.5, 132.2, 130.7, 129.4, 128.6, 123.5, 67.6, 21.2 ppm.

HRMS  $m/z$ : calcd for  $\text{C}_{15}\text{H}_{14}\text{NO}_4$   $[\text{M}+\text{H}]^+$  272.0917, found: 272.0923.

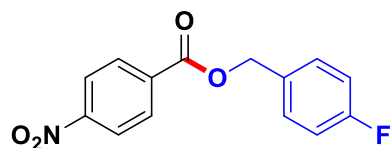

**4-Fluorobenzyl 4-nitrobenzoate (3ao)**<sup>[11]</sup>: Yield = 65% (178.8 mg). White solid.

$^1\text{H}$  NMR (401 MHz, Chloroform-*d*):  $\delta$  8.31 – 8.26 (m, 2H), 8.25 – 8.18 (m, 2H), 7.49 – 7.39 (m, 2H), 7.13 – 7.02 (m, 2H), 5.37 (s, 2H) ppm.

$^{19}\text{F}$  NMR (377 MHz, Chloroform-*d*):  $\delta$  -112.71 ppm.

$^{13}\text{C}$  NMR (101 MHz, Chloroform-*d*):  $\delta$  164.5, 162.8 (d,  $J = 245.9$  Hz), 150.6, 135.3, 131.1 (d,  $J = 3.2$  Hz), 130.8, 130.5 (d,  $J = 8.2$  Hz), 123.6, 115.7 (d,  $J = 21.5$  Hz), 66.9 ppm.

HRMS  $m/z$ : calcd for  $\text{C}_{14}\text{H}_{11}\text{FNO}_4$   $[\text{M}+\text{H}]^+$  276.0667, found: 276.0672.

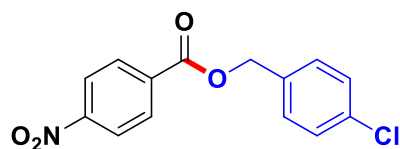

**4-chlorobenzyl 4-nitrobenzoate (3ap)**<sup>[11]</sup>: Yield = 64% (186.7 mg). White solid.

$^1\text{H}$  NMR (401 MHz, Chloroform-*d*):  $\delta$  8.31 – 8.25 (m, 2H), 8.24 – 8.19 (m, 2H), 7.42 – 7.34 (m, 4H), 5.36 (s, 2H) ppm.

$^{13}\text{C}$  NMR (101 MHz, Chloroform-*d*):  $\delta$  164.4, 150.6, 135.2, 134.6, 133.7, 130.8, 129.8, 128.9, 123.6, 66.8 ppm.

HRMS  $m/z$ : calcd for  $\text{C}_{14}\text{H}_{11}\text{ClNO}_4$   $[\text{M}+\text{H}]^+$  292.0371, found: 292.0377.

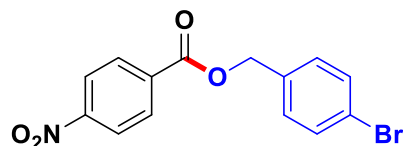

**4-Bromobenzyl 4-nitrobenzoate (3aq)**<sup>[12]</sup>: Yield = 55% (184.9 mg). White solid.

$^1\text{H}$  NMR (401 MHz, Chloroform-*d*):  $\delta$  8.32 – 8.26 (m, 2H), 8.25 – 8.18 (m, 2H), 7.56 – 7.51 (m, 2H), 7.36 – 7.30 (m, 2H), 5.35 (s, 2H) ppm.

$^{13}\text{C}$  NMR (101 MHz, Chloroform-*d*):  $\delta$  164.5, 150.5, 135.4, 135.2, 130.8, 128.7, 128.6, 128.4, 123.5, 67.6 ppm.

HRMS  $m/z$ : calcd for  $\text{C}_{14}\text{H}_{11}\text{BrNO}_4$   $[\text{M}+\text{H}]^+$  335.9866, found: 335.9872.

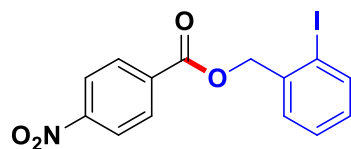

**2-Iodobenzyl 4-nitrobenzoate (3ar)**: Yield = 52% (199.2 mg). White solid. M.p. = 108.5-109.1 °C.

$^1\text{H}$  NMR (401 MHz, Chloroform-*d*):  $\delta$  8.34 – 8.22 (m, 4H), 7.95 – 7.87 (m, 1H), 7.50 – 7.45 (m, 1H), 7.42 – 7.36 (m, 1H), 7.12 – 7.03 (m, 1H), 5.42 (s, 2H) ppm.

$^{13}\text{C}$  NMR (101 MHz, Chloroform-*d*):  $\delta$  164.4, 150.7, 139.9, 137.8, 135.4, 131.0, 130.5, 130.2,



128.6, 123.7, 99.0, 71.3 ppm.

**HRMS m/z:** calcd for C<sub>14</sub>H<sub>11</sub>INO<sub>4</sub> [M+H]<sup>+</sup> 383.9727, found: 383.9733.

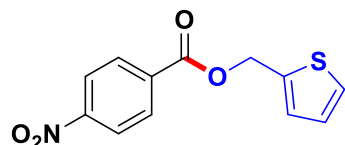

**Thiophen-2-ylmethyl 4-nitrobenzoate (3as):** Yield = 64% (169.5 mg). White solid. M.p. = 102.4-103.1 °C.

**<sup>1</sup>H NMR (401 MHz, Chloroform-*d*):** δ 8.30 – 8.15 (m, 4H), 7.36 (dd, *J* = 5.1, 1.3 Hz, 1H), 7.19 (d, *J* = 4.3 Hz, 1H), 7.02 (dd, *J* = 5.1, 3.5 Hz, 1H), 5.55 (s, 2H) ppm.

**<sup>13</sup>C NMR (101 MHz, Chloroform-*d*):** δ 164.4, 150.6, 137.0, 135.3, 130.9, 128.8, 127.3, 127.0, 123.5, 61.8 ppm.

**HRMS m/z:** calcd for C<sub>12</sub>H<sub>10</sub>NO<sub>4</sub>S [M+H]<sup>+</sup> 264.0325, found: 264.0331.

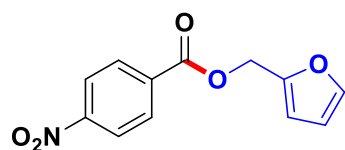

**Furan-2-ylmethyl 4-nitrobenzoate (3at):** Yield = 63% (156 mg). Light yellow solid. M.p. = 74.9-75.8 °C.

**<sup>1</sup>H NMR (401 MHz, Chloroform-*d*):** δ 8.28 – 8.23 (m, 2H), 8.23 – 8.18 (m, 2H), 7.45 (dd, *J* = 1.9, 0.8 Hz, 1H), 6.54 – 6.50 (m, 1H), 6.39 (dd, *J* = 3.3, 1.8 Hz, 1H), 5.34 (s, 2H) ppm.

**<sup>13</sup>C NMR (101 MHz, Chloroform-*d*):** δ 164.3, 150.5, 148.7, 143.6, 135.2, 130.8, 123.4, 111.4, 110.7, 59.2 ppm.

**HRMS m/z:** calcd for C<sub>12</sub>H<sub>10</sub>NO<sub>5</sub> [M+H]<sup>+</sup> 248.0553, found: 248.0559.

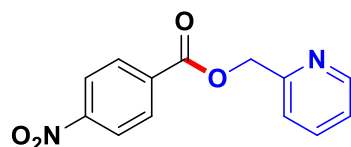

**Pyridin-2-ylmethyl 4-nitrobenzoate (3av):** Yield = 69% (178 mg). White solid. M.p. > 200 °C.

**<sup>1</sup>H NMR (401 MHz, Chloroform-*d*):** δ 8.65 – 8.60 (m, 1H), 8.32 – 8.24 (m, 4H), 7.74 (td, *J* = 7.7, 1.8 Hz, 1H), 7.46 – 7.42 (m, 1H), 7.30 – 7.26 (m, 1H), 5.51 (s, 2H) ppm.

**<sup>13</sup>C NMR (101 MHz, Chloroform-*d*):** δ 164.4, 155.0, 150.6, 149.7, 136.9, 135.2, 130.9, 123.6, 123.2, 122.1, 68.0 ppm.

**HRMS m/z:** calcd for C<sub>13</sub>H<sub>11</sub>N<sub>2</sub>O<sub>4</sub> [M+H]<sup>+</sup> 259.0713, found: 259.0719.

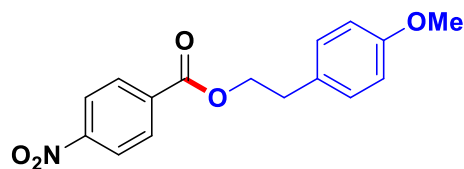

**4-Methoxyphenethyl 4-nitrobenzoate (3aw):** Yield = 66% (198.9 mg). White solid. M.p. = 112.3-113.0 °C.

**<sup>1</sup>H NMR (401 MHz, Chloroform-*d*):** δ 8.28 (dd, *J* = 8.9, 2.2 Hz, 2H), 8.22 – 8.11 (m, 2H), 7.19 (dd, *J* = 8.7, 2.2 Hz, 2H), 6.92 – 6.79 (m, 2H), 4.54 (t, *J* = 7.0 Hz, 2H), 3.79 (s, 3H), 3.04 (t, *J* = 7.0 Hz, 2H) ppm.

**<sup>13</sup>C NMR (101 MHz, Chloroform-*d*):**  $\delta$  164.6, 158.4, 150.5, 135.6, 130.6, 129.8, 129.3, 123.5, 114.0, 66.5, 55.2, 34.2 ppm.

**HRMS *m/z*:** calcd for C<sub>16</sub>H<sub>16</sub>NO<sub>5</sub> [M+H]<sup>+</sup> 302.1023, found: 302.1028.

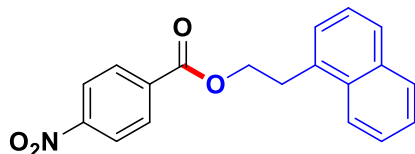

**2-(Naphthalen-1-yl)ethyl 4-nitrobenzoate (3ax):** Yield = 58% (186.4 mg). White solid. M.p. = 146.6-147.0 °C.

**<sup>1</sup>H NMR (400 MHz, Chloroform-*d*):**  $\delta$  8.29 – 8.23 (m, 2H), 8.18 – 8.11 (m, 3H), 7.92 – 7.86 (m, 1H), 7.82 – 7.76 (m, 1H), 7.61 – 7.49 (m, 2H), 7.47 – 7.41 (m, 2H), 4.72 (t, *J* = 7.2 Hz, 2H), 3.58 (t, *J* = 7.2 Hz, 2H) ppm.

**<sup>13</sup>C NMR (101 MHz, Chloroform-*d*):**  $\delta$  164.7, 150.5, 135.5, 133.9, 133.3, 132.0, 130.7, 128.9, 127.7, 127.1, 126.3, 125.8, 125.5, 123.5, 123.5, 65.9, 32.1 ppm.

**HRMS *m/z*:** calcd for C<sub>19</sub>H<sub>16</sub>NO<sub>4</sub> [M+H]<sup>+</sup> 322.1074, found: 322.1079.

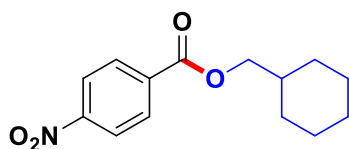

**Cyclohexylmethyl 4-nitrobenzoate (3ay):** Yield = 46% (121.1 mg). White solid. M.p. = 49.3-51.2 °C.

**<sup>1</sup>H NMR (401 MHz, Chloroform-*d*):**  $\delta$  8.29 – 8.22 (m, 2H), 8.21 – 8.14 (m, 2H), 4.16 (dd, *J* = 6.3, 2.0 Hz, 2H), 1.83 – 1.66 (m, 5H), 1.34 – 1.14 (m, 4H), 1.11 – 0.98 (m, 2H) ppm.

**<sup>13</sup>C NMR (101 MHz, Chloroform-*d*):**  $\delta$  164.7, 150.4, 135.8, 130.6, 123.5, 70.9, 37.1, 29.6, 26.2, 25.6 ppm.

**HRMS *m/z*:** calcd for C<sub>14</sub>H<sub>18</sub>NO<sub>4</sub> [M+H]<sup>+</sup> 264.1230, found: 264.1236.

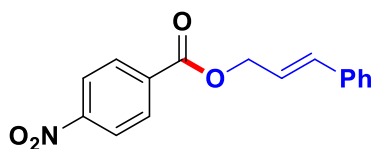

**Cinnamyl 4-nitrobenzoate (3az)<sup>[13]</sup>:** Yield = 62% (175.6 mg). White solid.

**<sup>1</sup>H NMR (401 MHz, Chloroform-*d*):**  $\delta$  8.24 – 8.15 (m, 4H), 7.40 – 7.35 (m, 2H), 7.31 – 7.26 (m, 2H), 7.25 – 7.20 (m, 1H), 6.71 (dt, *J* = 15.9, 1.4 Hz, 1H), 6.35 (dt, *J* = 15.8, 6.6 Hz, 1H), 4.97 (dd, *J* = 6.6, 1.3 Hz, 2H) ppm.

**<sup>13</sup>C NMR (101 MHz, Chloroform-*d*):**  $\delta$  164.4, 150.4, 135.8, 135.4, 135.1, 130.6, 128.6, 128.2, 126.6, 123.4, 122.2, 66.4 ppm.

**HRMS *m/z*:** calcd for C<sub>16</sub>H<sub>14</sub>NO<sub>4</sub> [M+H]<sup>+</sup> 284.0917, found: 284.0923.

## **References**

- [1] X.-F. Wu, C. Darcel, *Eur. J. Org. Chem.* **2009**, 2009, 1144-1147.
- [2] W. Zhong, H. Liu, C. Bai, S. Liao, Y. Li, *ACS Catal.* **2015**, 5, 1850-1856.
- [3] D. E. Bergbreiter, Y.-C. Yang, C. E. Hobbs, *J. Org. Chem.* **2011**, 76, 6912-6917.
- [4] M. Vandamme, L. Bouchard, A. Gilbert, M. Keita, J.-F. Paquin, *Org. Lett.* **2016**, 18, 6468-6471.
- [5] Y.-C. Xin, S.-H. Shi, D.-D. Xie, X.-P. Hui, P.-F. Xu, *Eur. J. Org. Chem.* **2011**, 2011, 6527-6531.
- [6] L. T. Ball, M. Green, G. C. Lloyd-Jones, C. A. Russell, *Org. Lett.* **2010**, 12, 4724-4727.
- [7] Z. Lu, B. S. Bajwa, S. Liu, S. Lee, G. B. Hammond, B. Xu, *Green Chem.* **2019**, 21, 1467-1471.
- [8] K. K. Rajbongshi, M. J. Sarma, P. Phukan, *Tetrahedron Lett.* **2014**, 55, 5358-5360.
- [9] S.-M. Wang, N. S. Alharbi, H.-L. Qin, *Synthesis* **2019**, 51, 3901-3907.
- [10] H. Tan, S.-A. Wang, Z. Yan, J. Liu, J. Wei, S. Song, N. Jiao, *Angew. Chem. Int. Ed.* **2021**, 60, 2140-2144.
- [11] W. Zhang, Y. Lu, *J. Comb. Chem.* **2007**, 9, 836-843.
- [12] T. Y. S. But, P. H. Toy, *J. Am. Chem. Soc.* **2006**, 128, 9636-9637.
- [13] C. Hollingworth, A. Hazari, M. N. Hopkinson, M. Tredwell, E. Benedetto, M. Huiban, A. D. Gee, J. M. Brown, V. Gouverneur, *Angew. Chem. Int. Ed.* **2011**, 50, 2613-2617.

# $^1\text{H}$ , $^{19}\text{F}$ , and $^{13}\text{C}$ NMR spectra of products

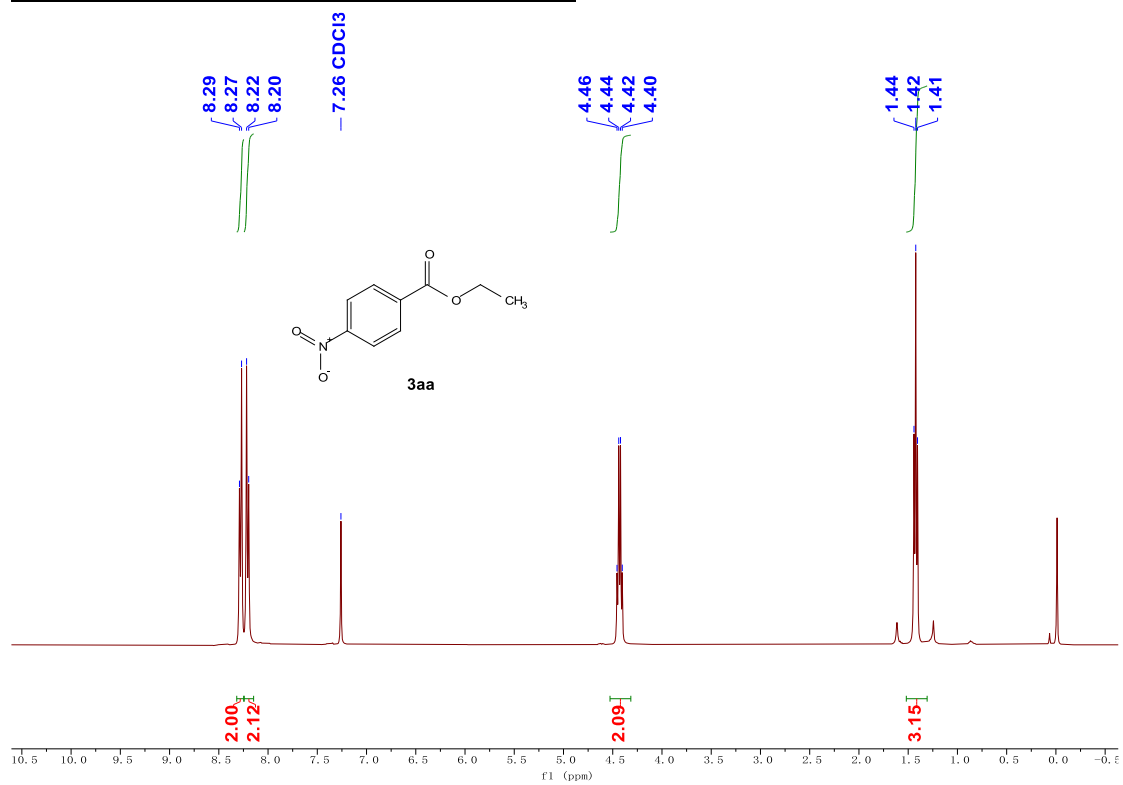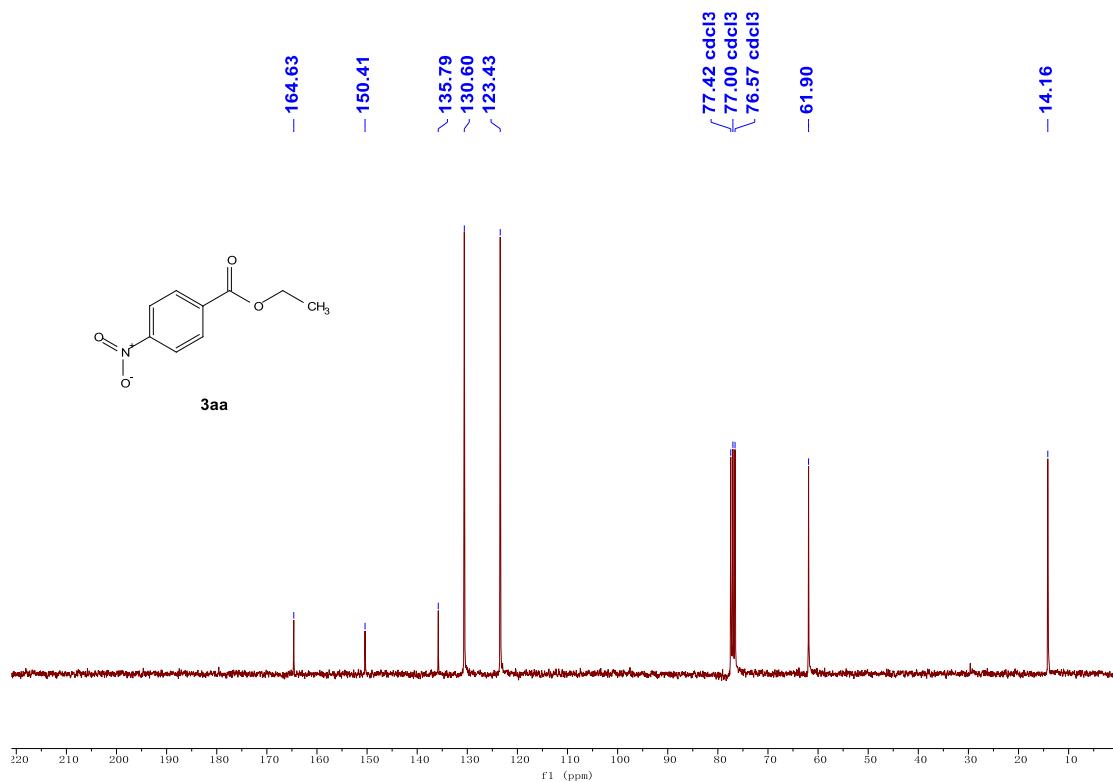

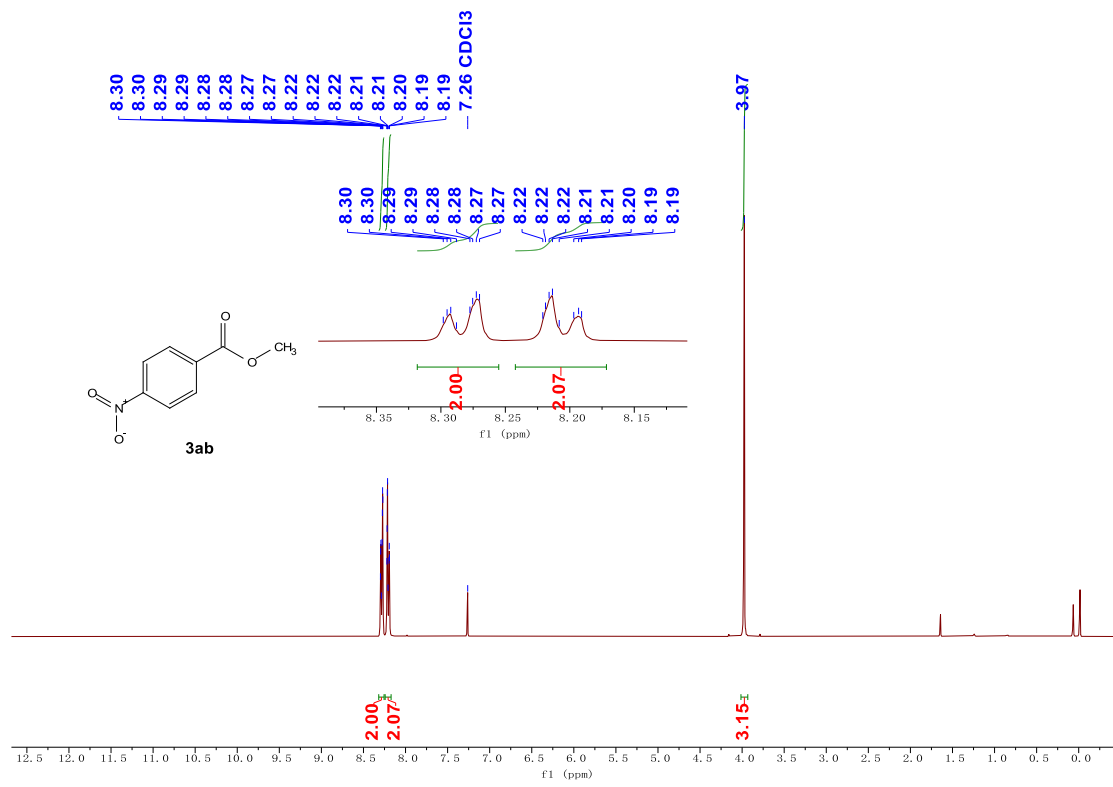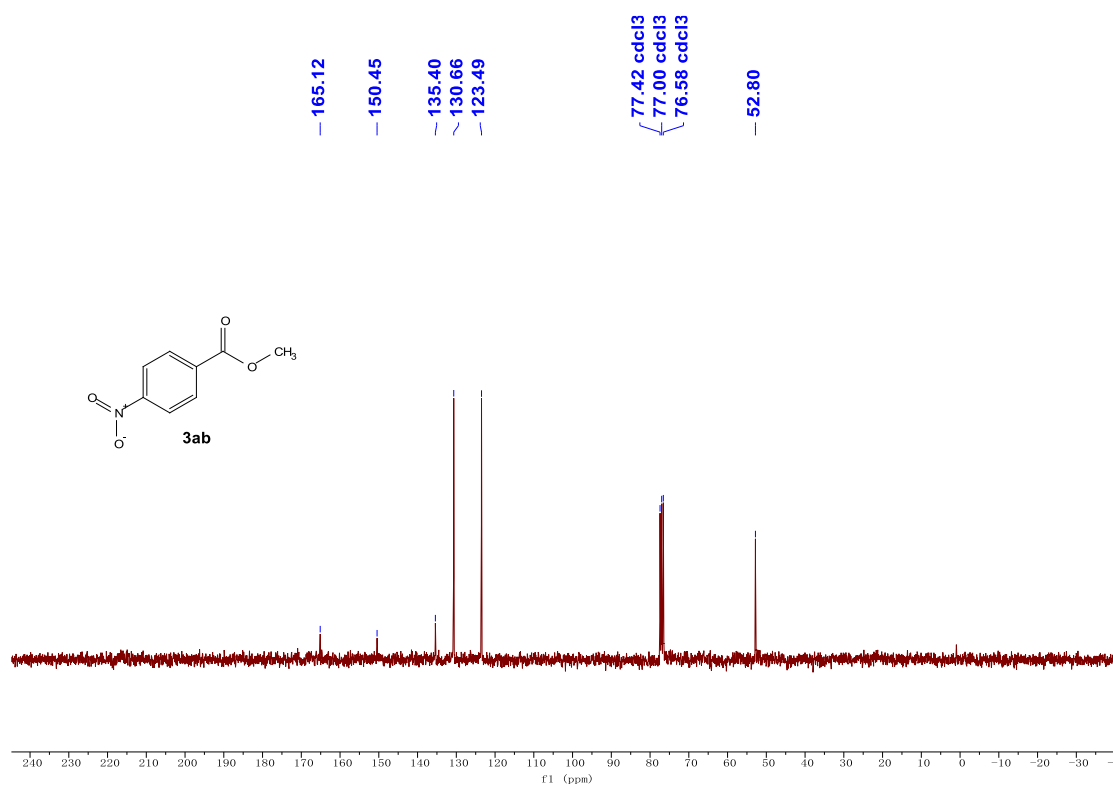

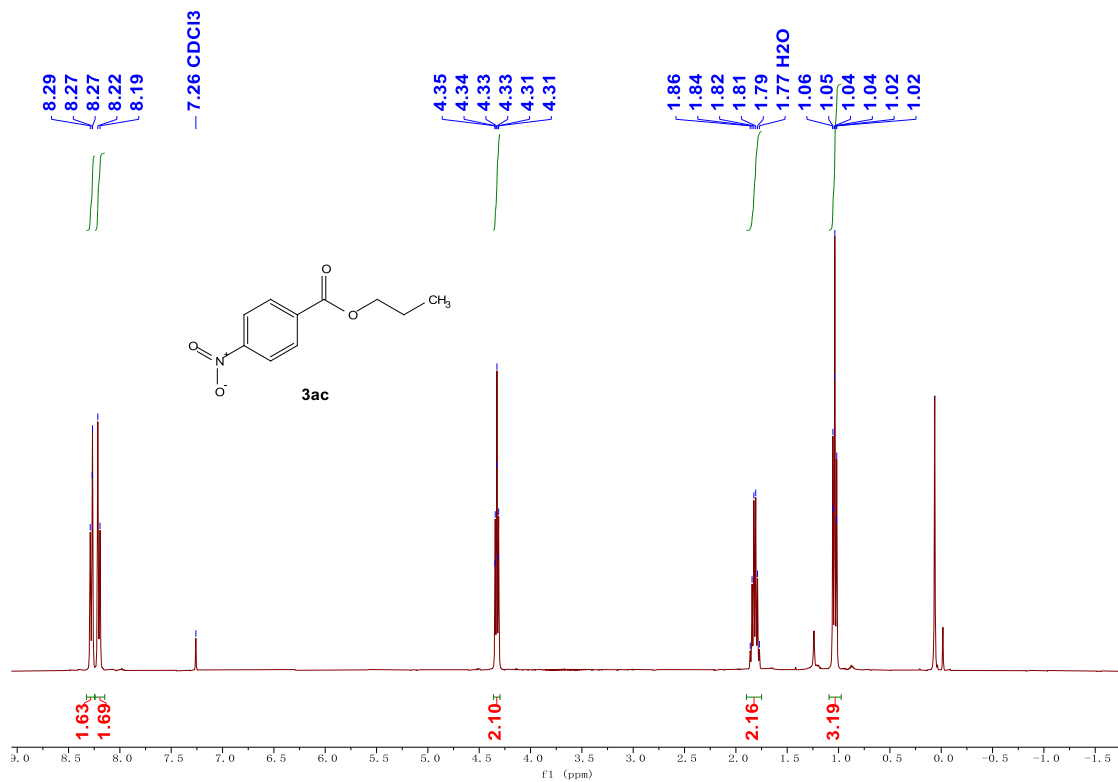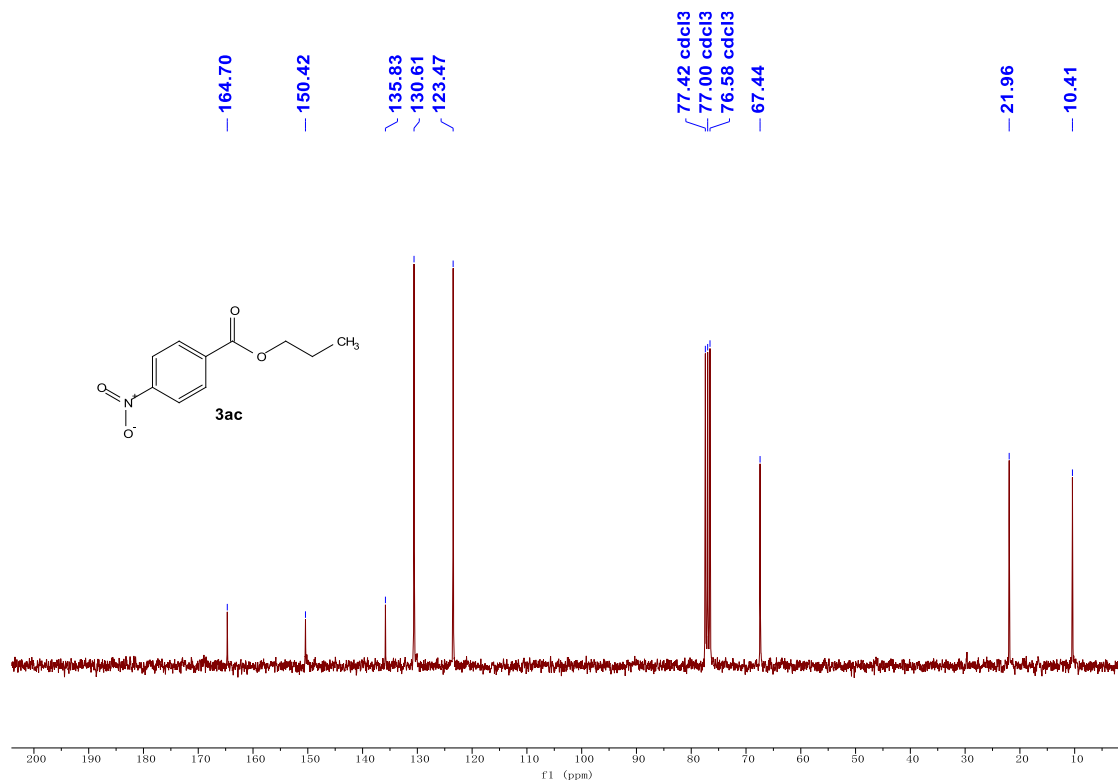

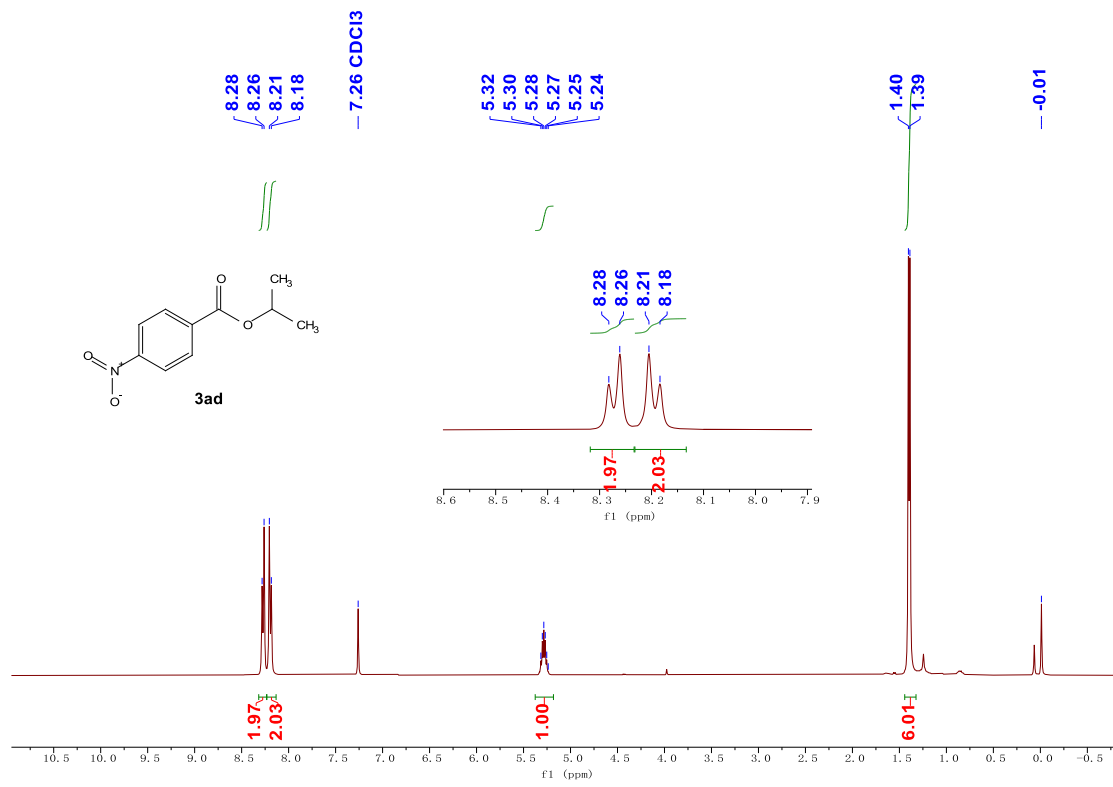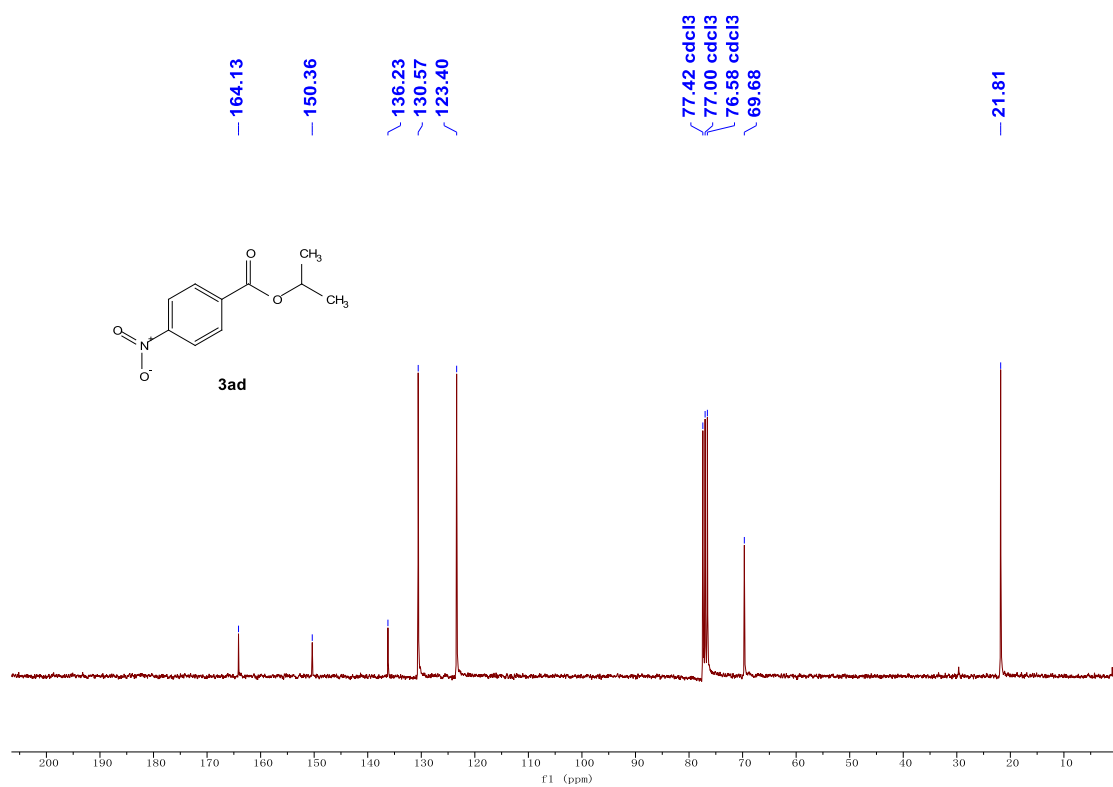

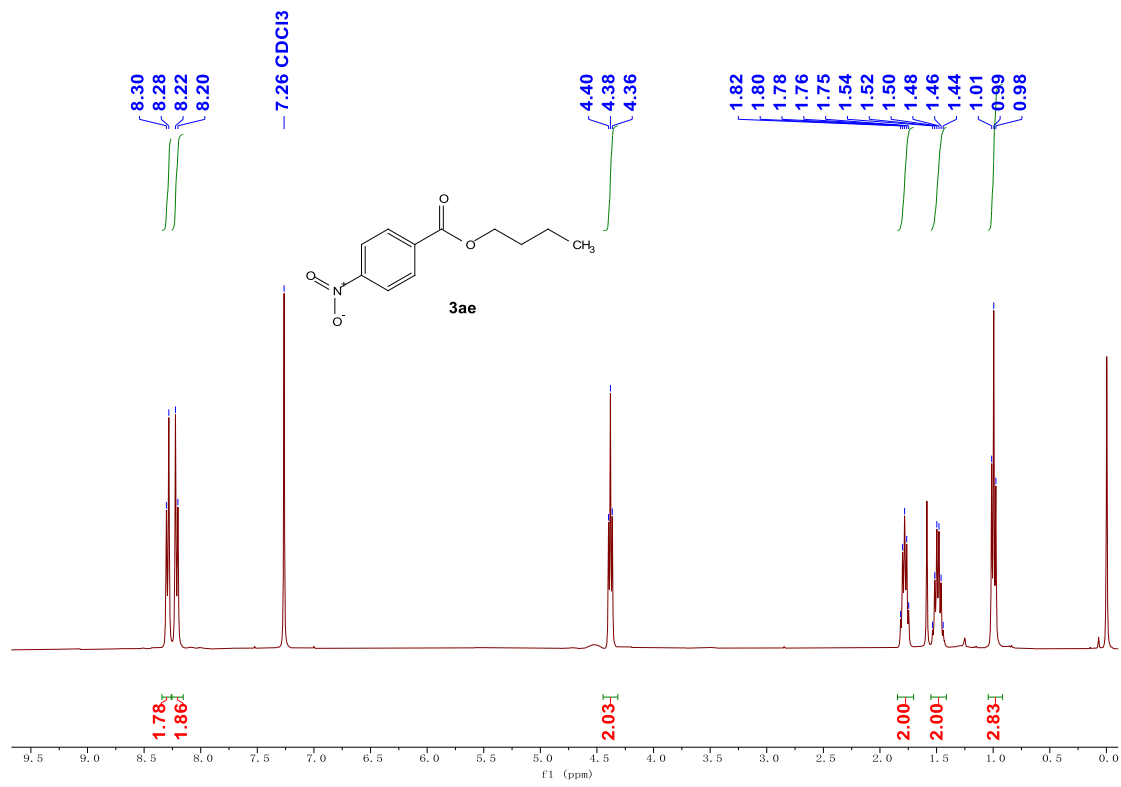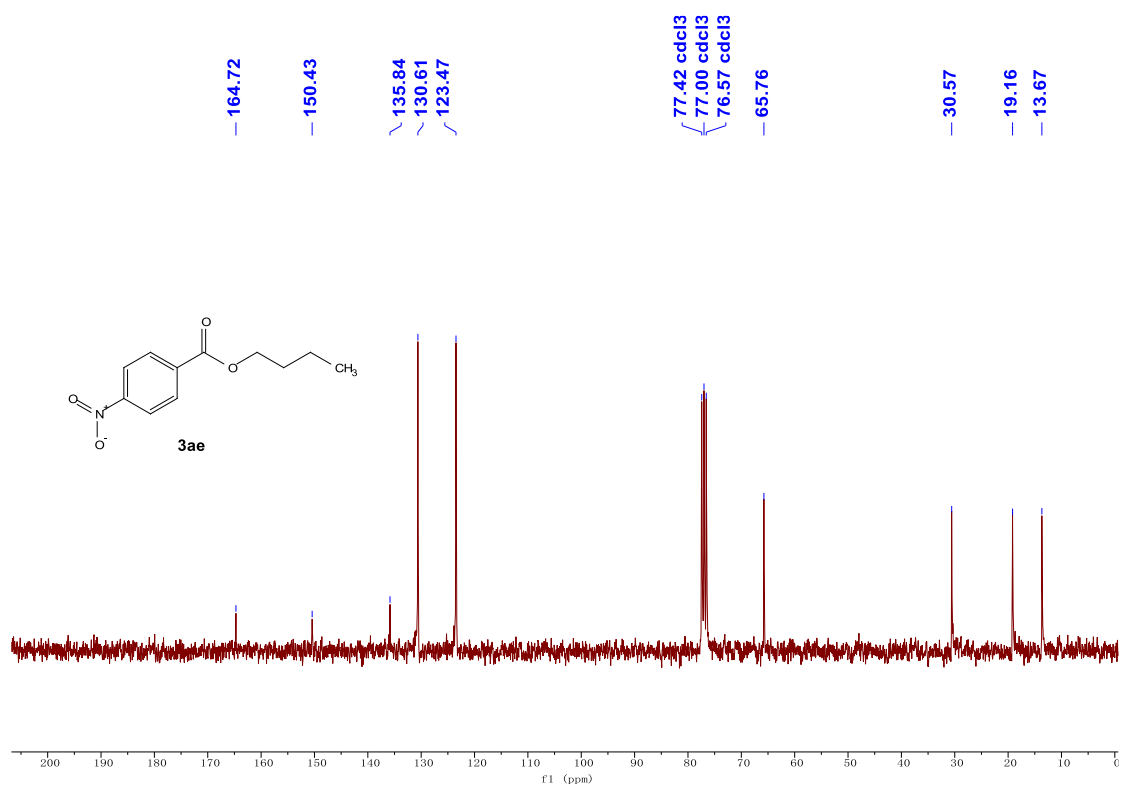



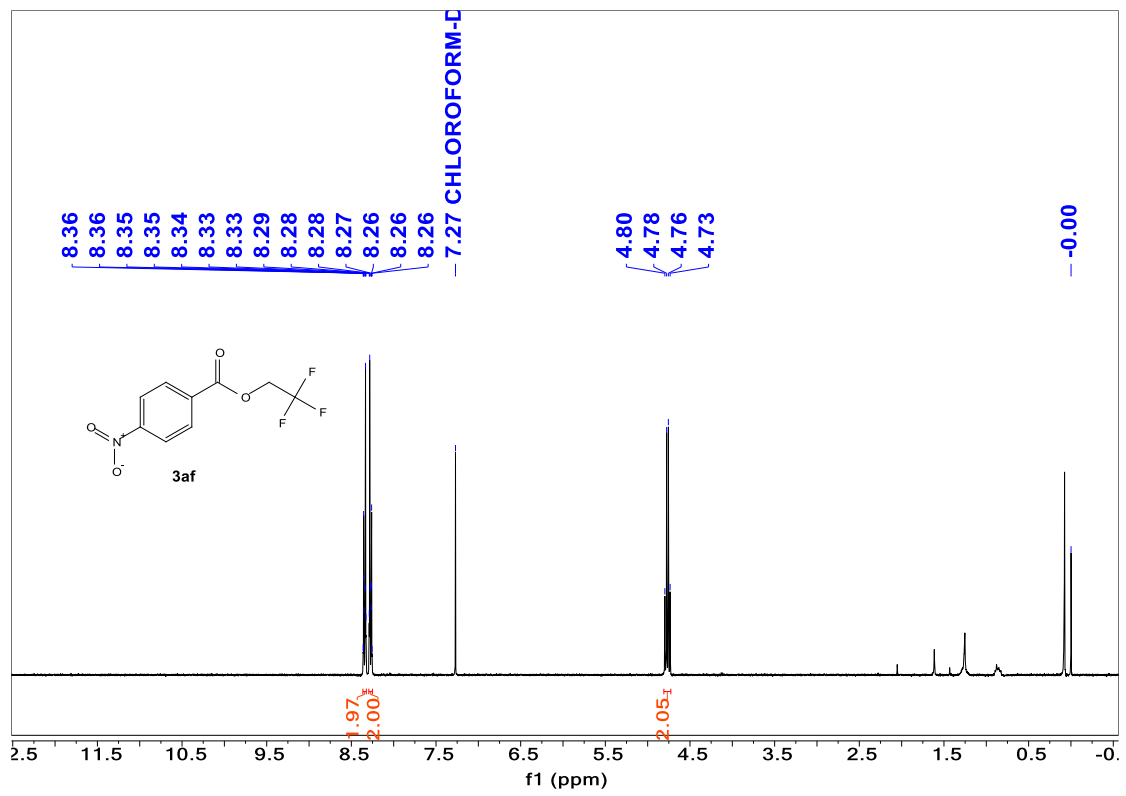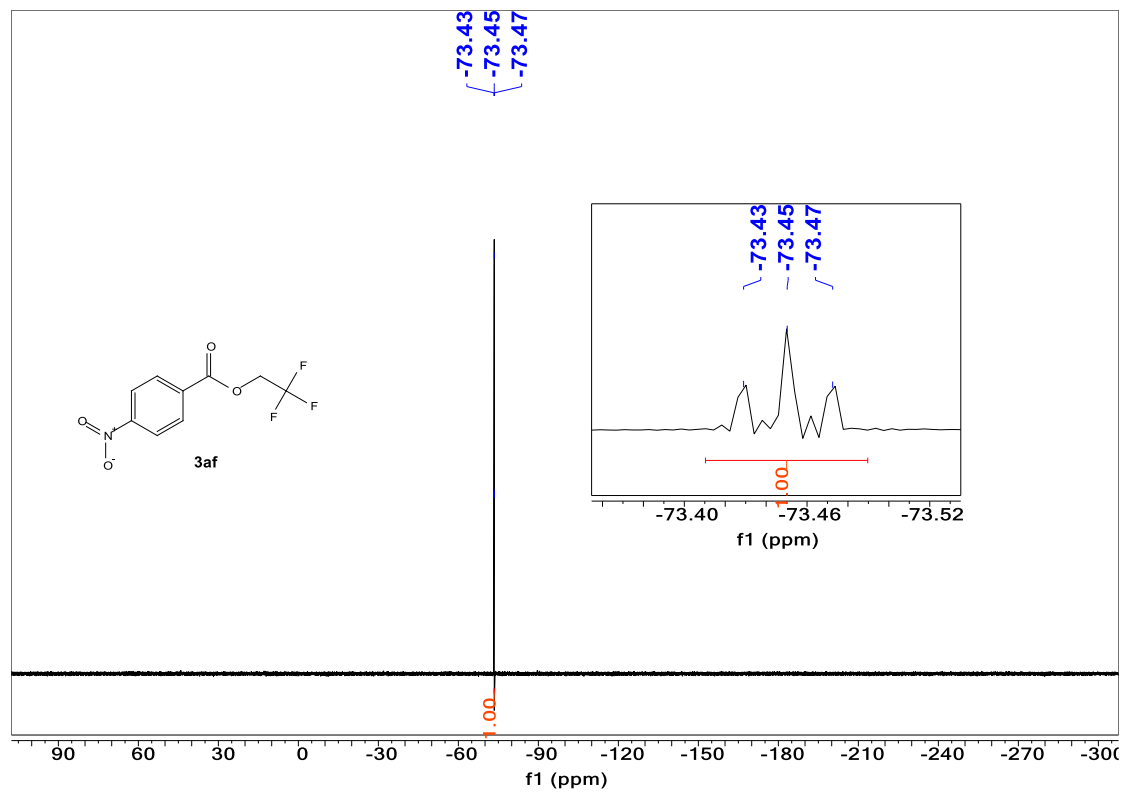

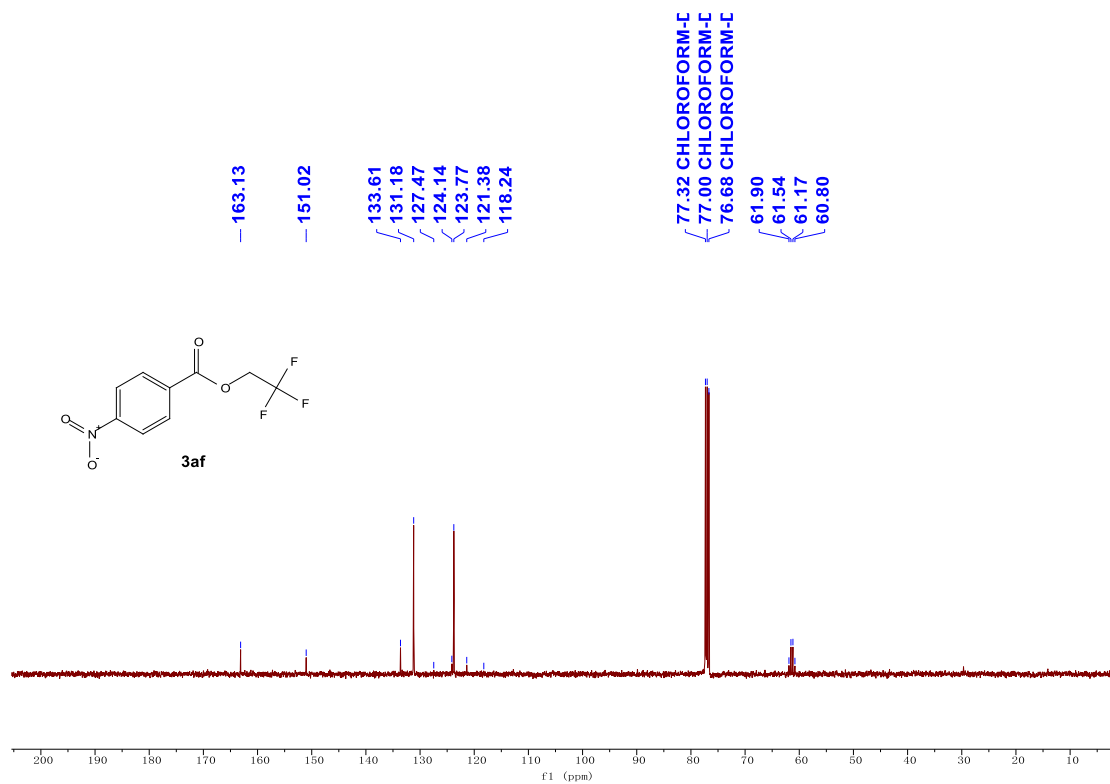

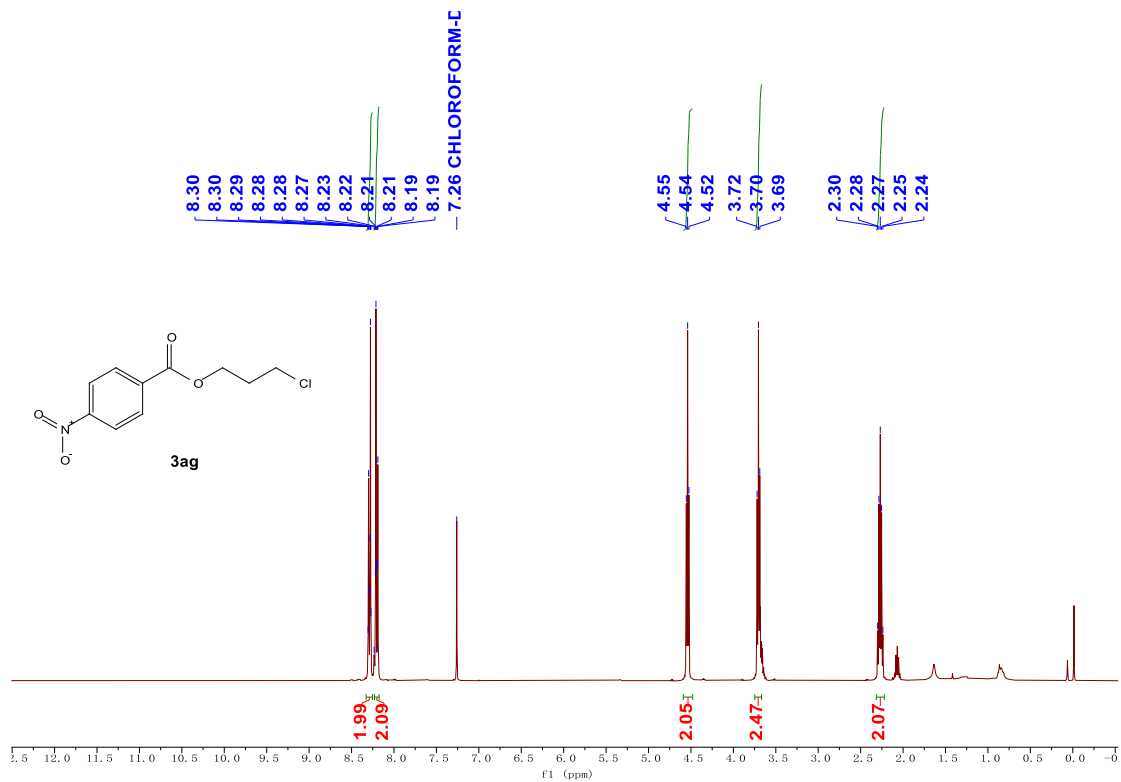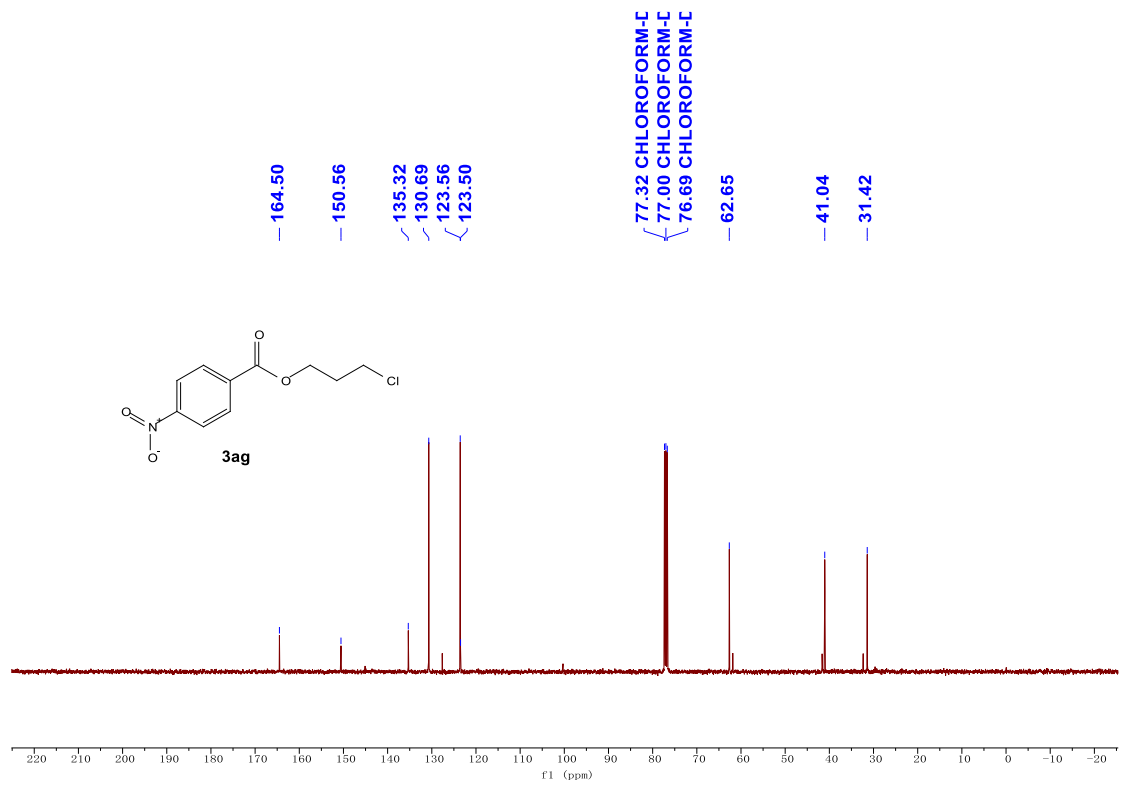

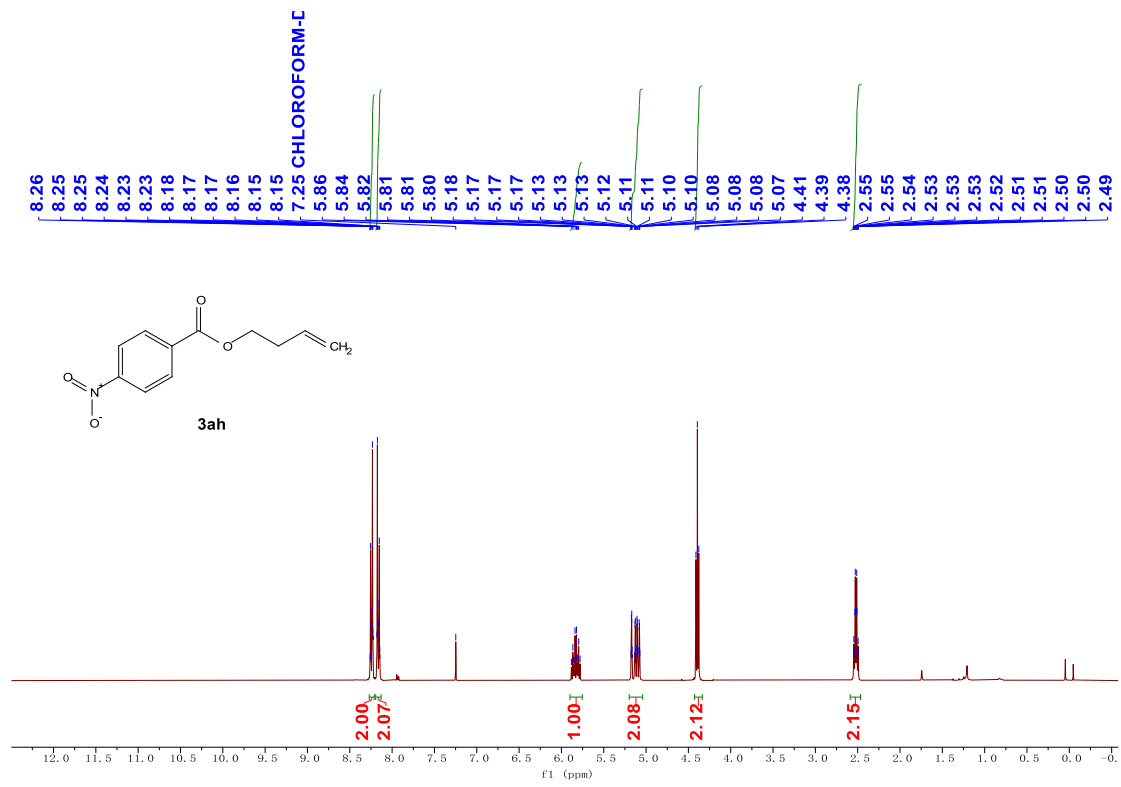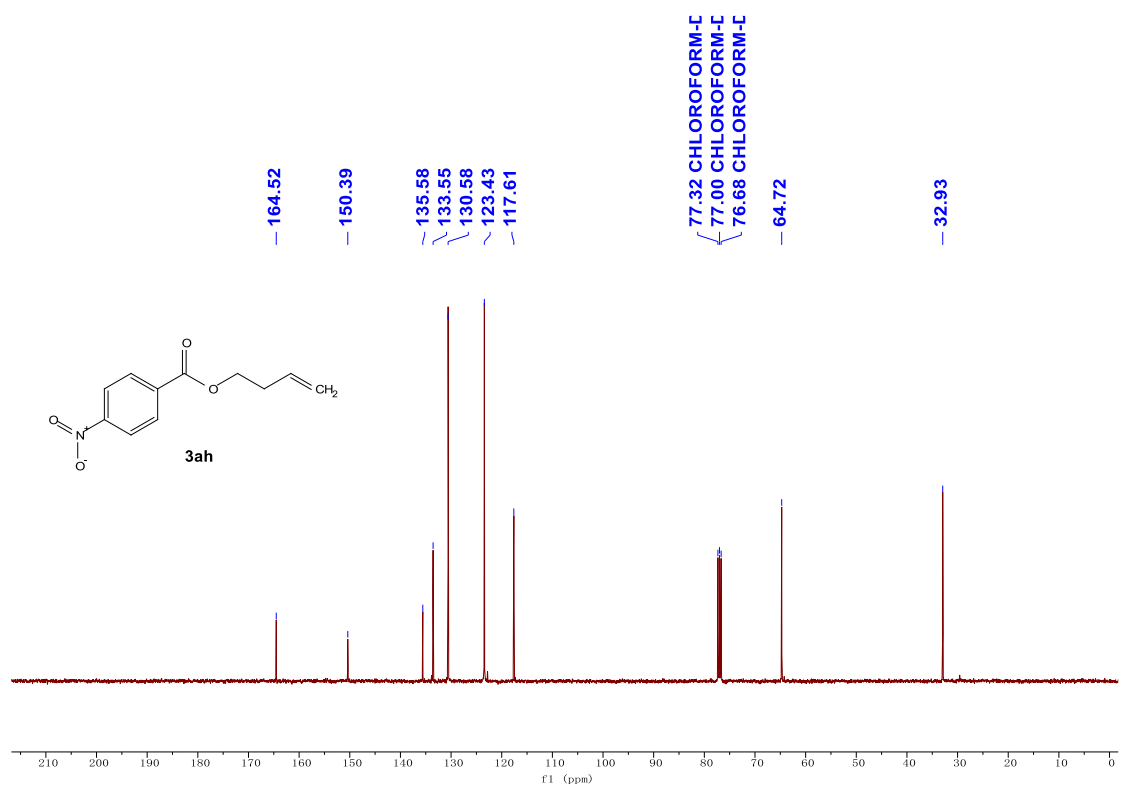

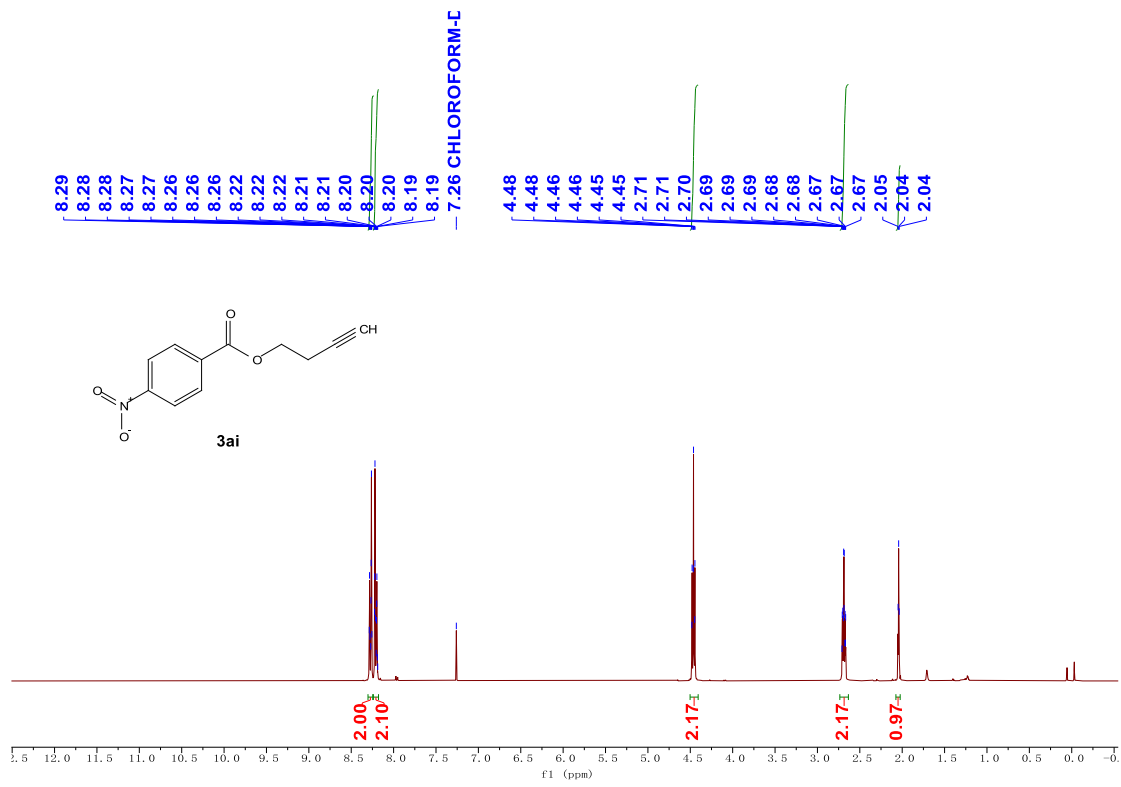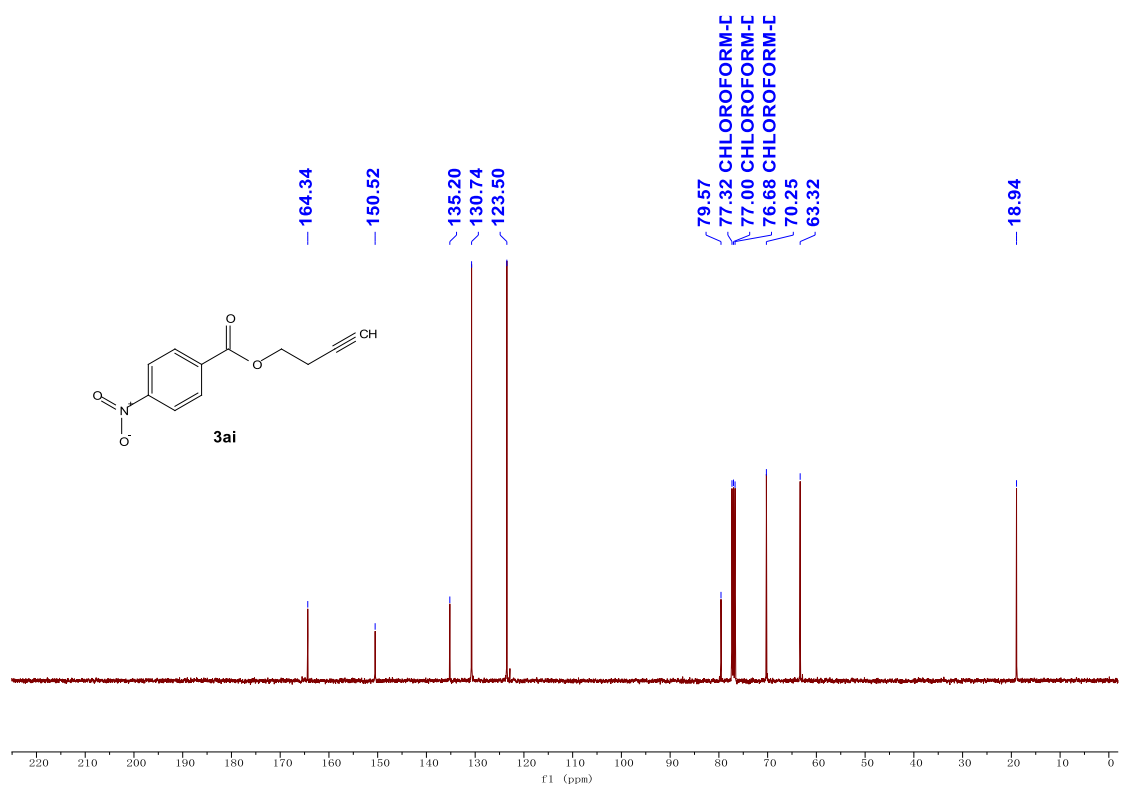

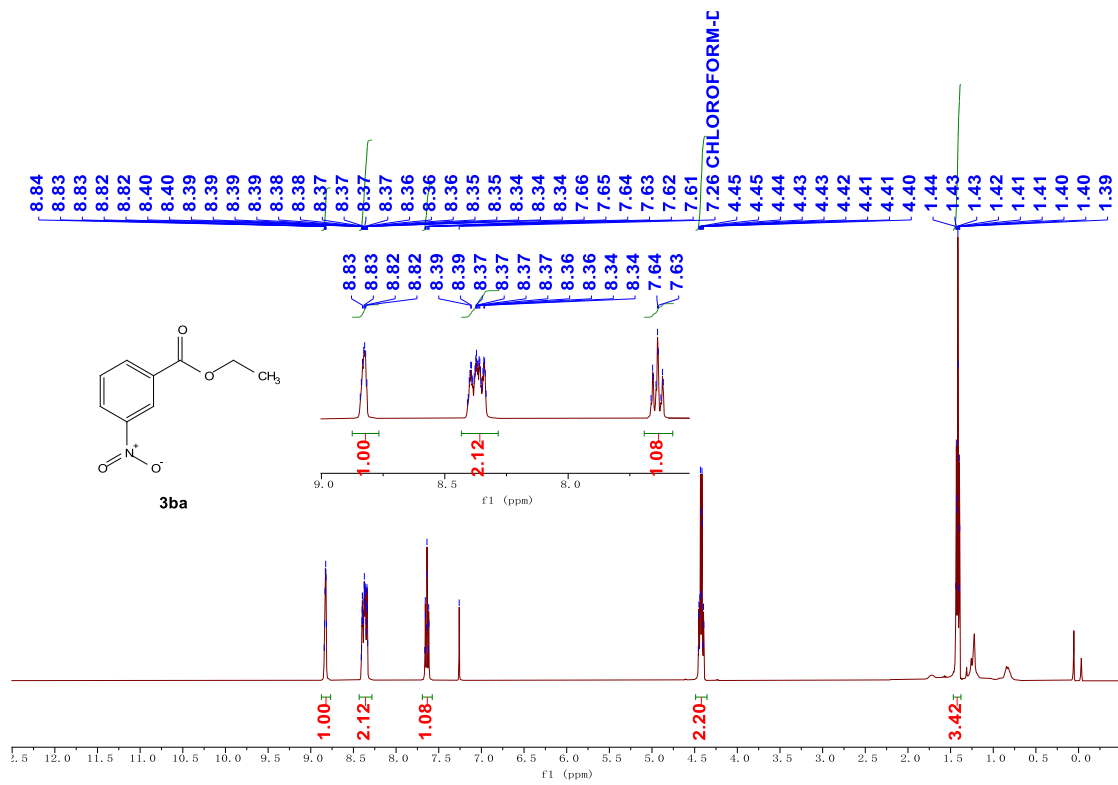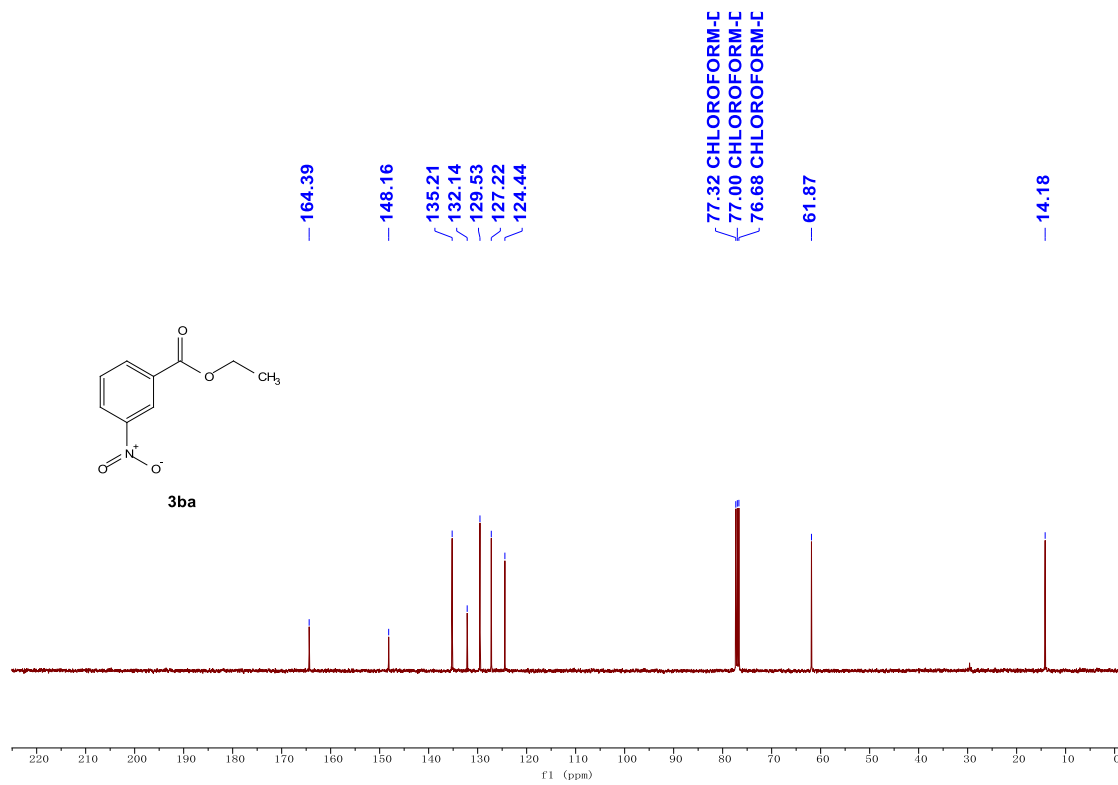

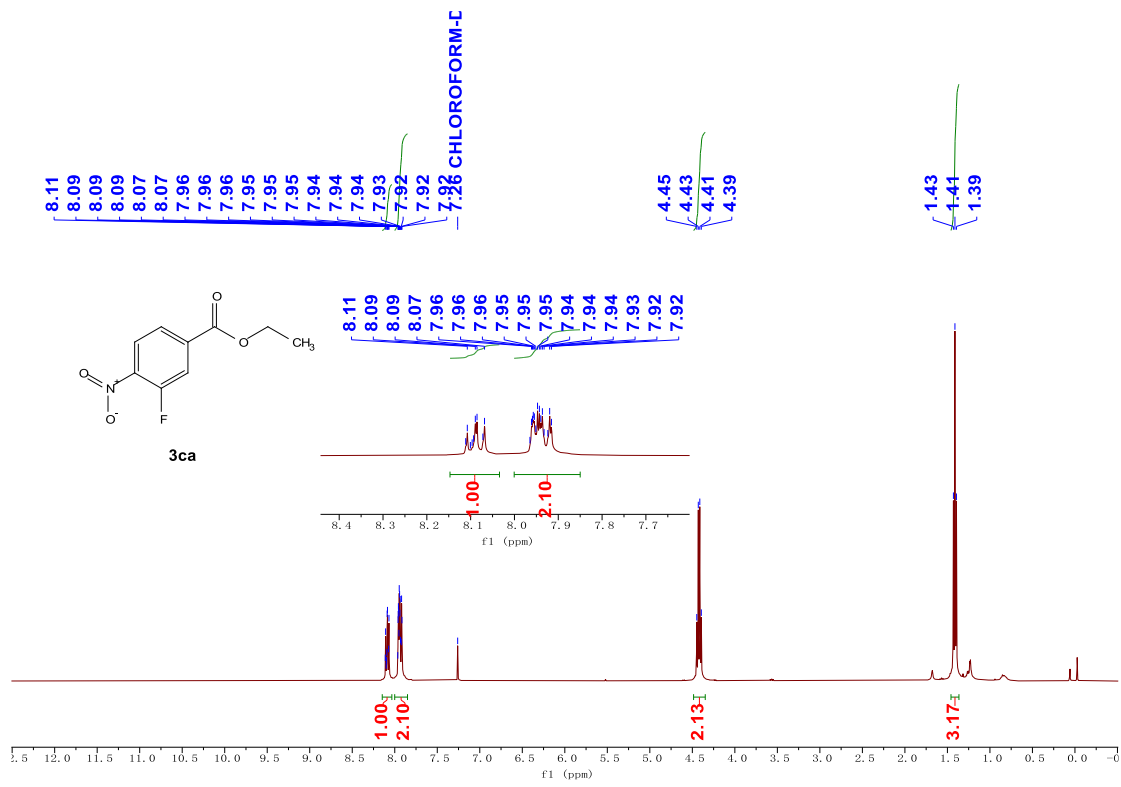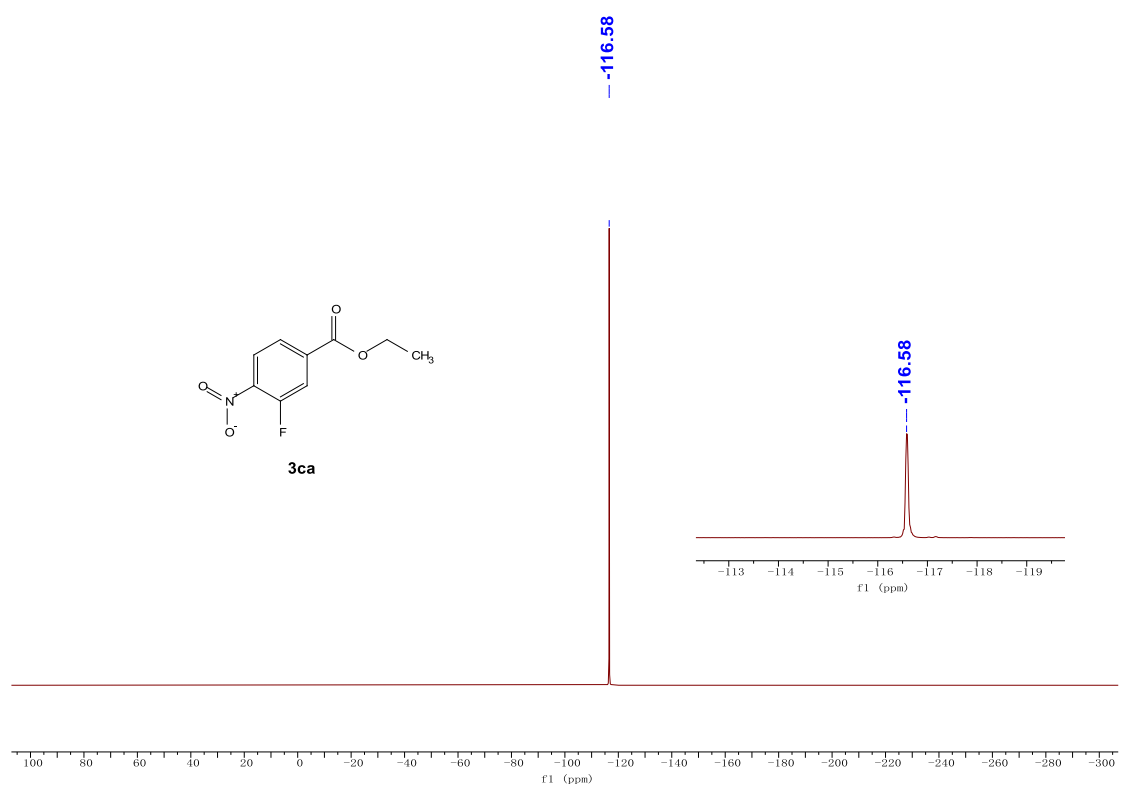

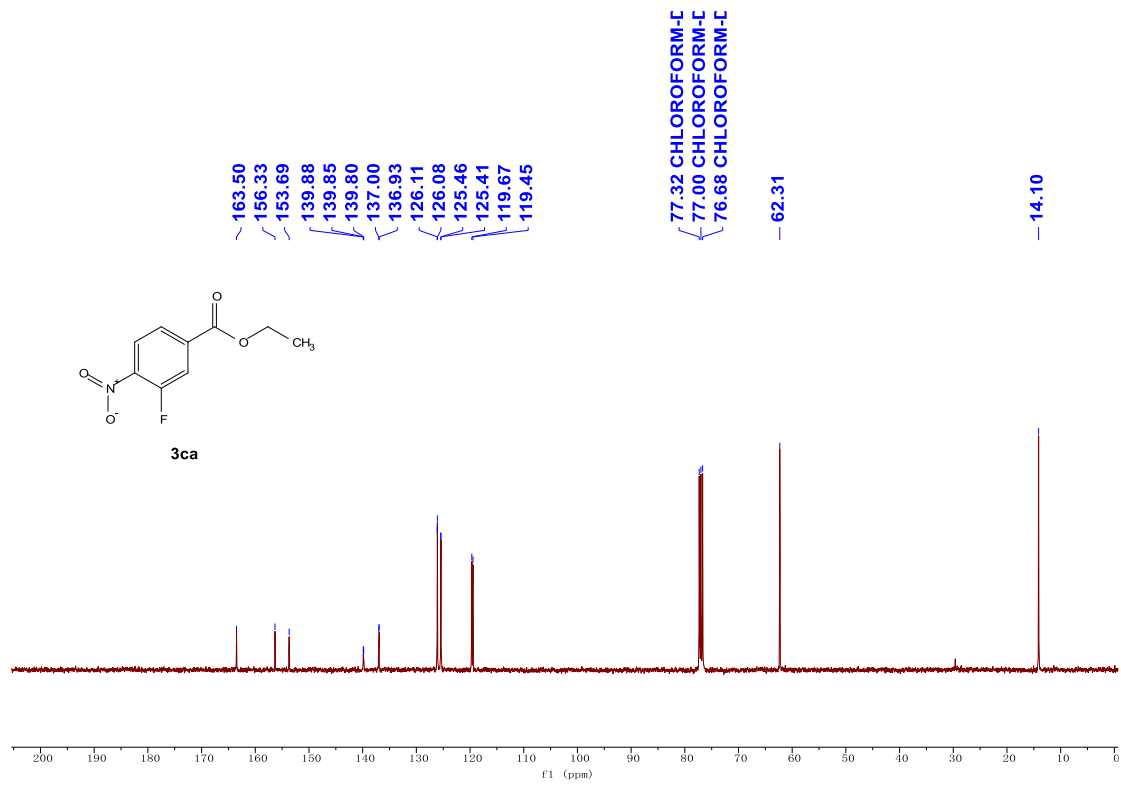



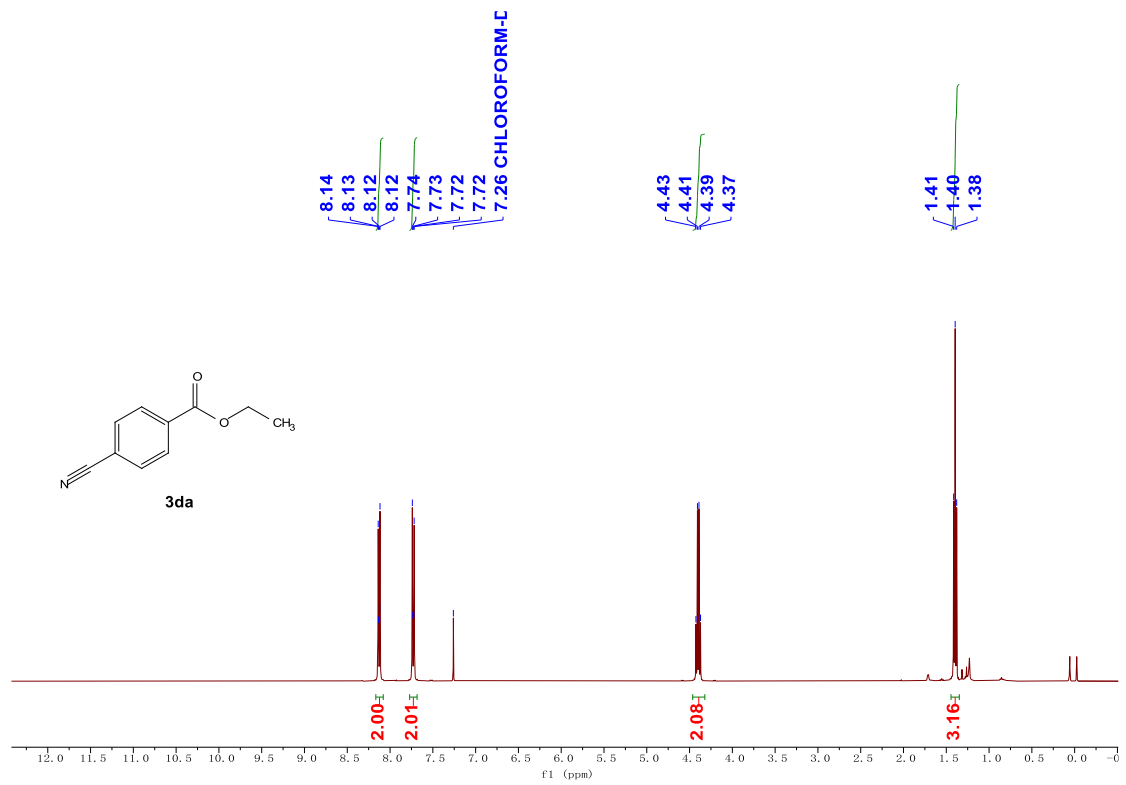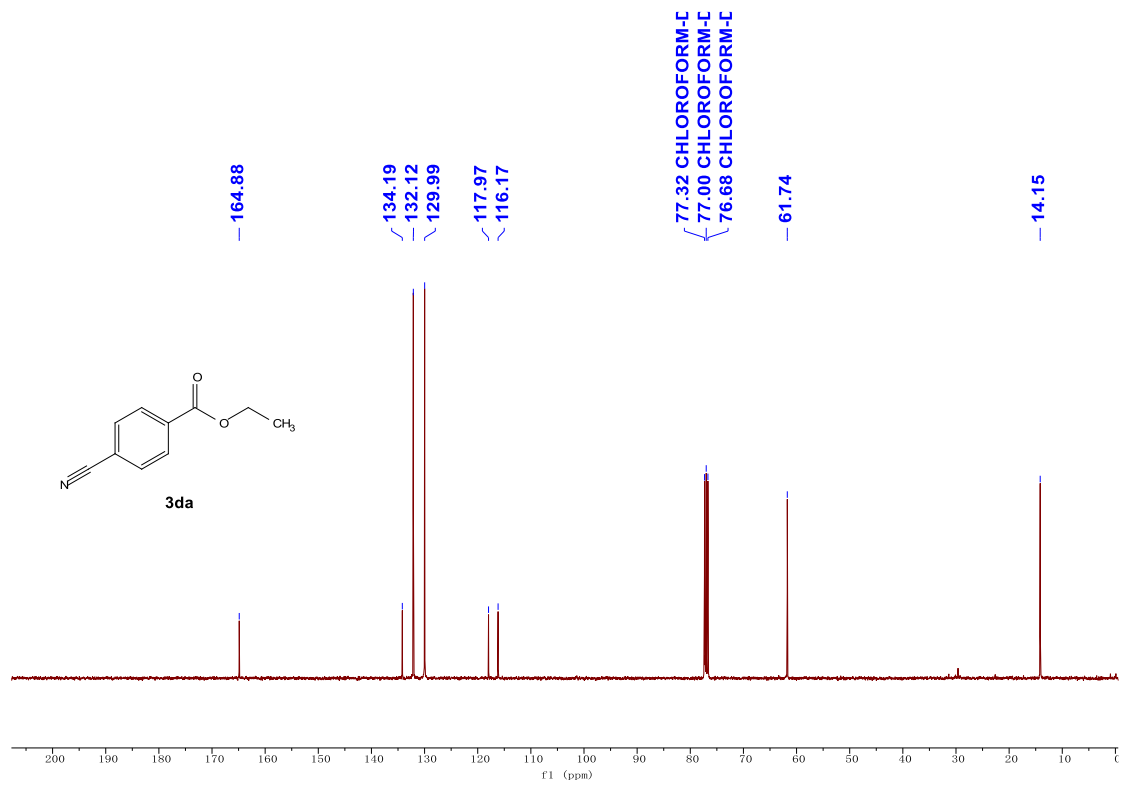

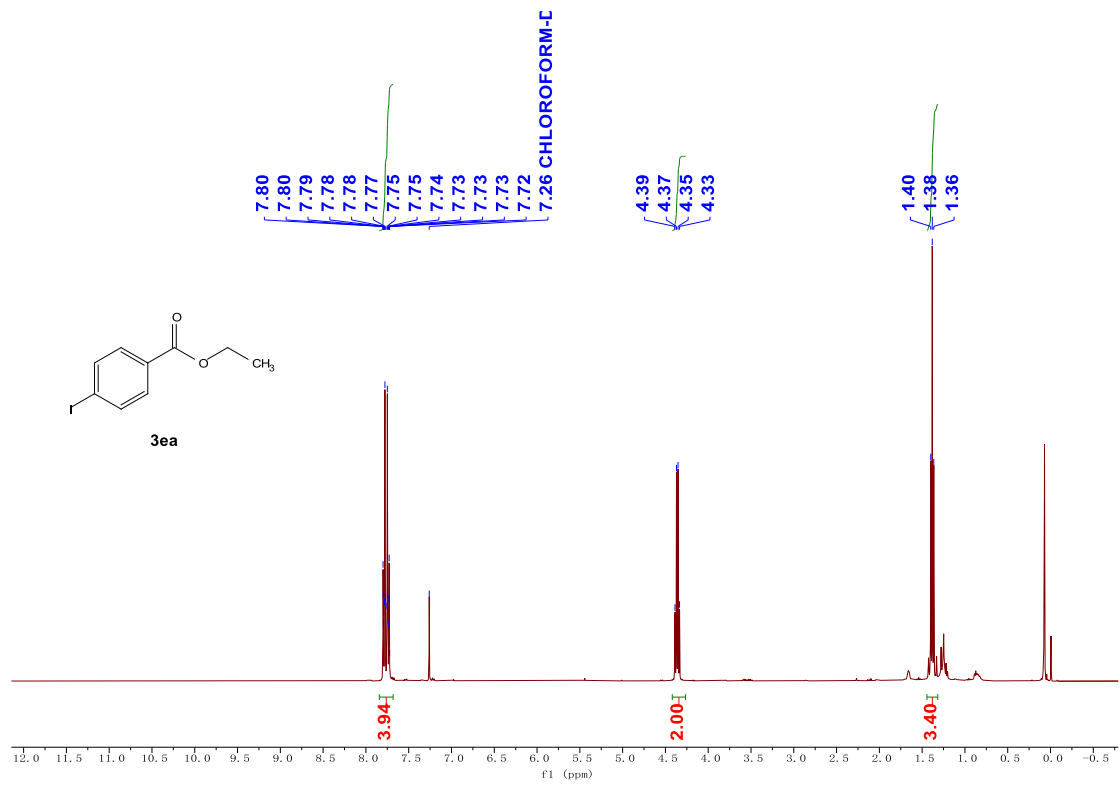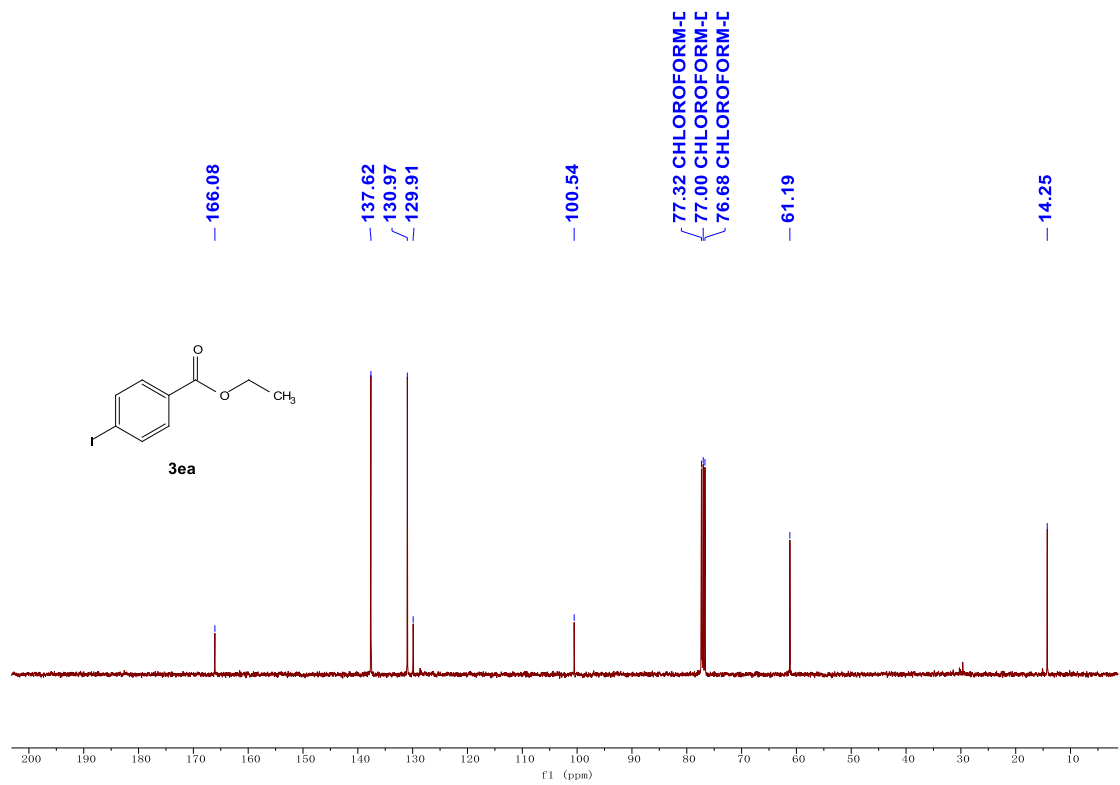

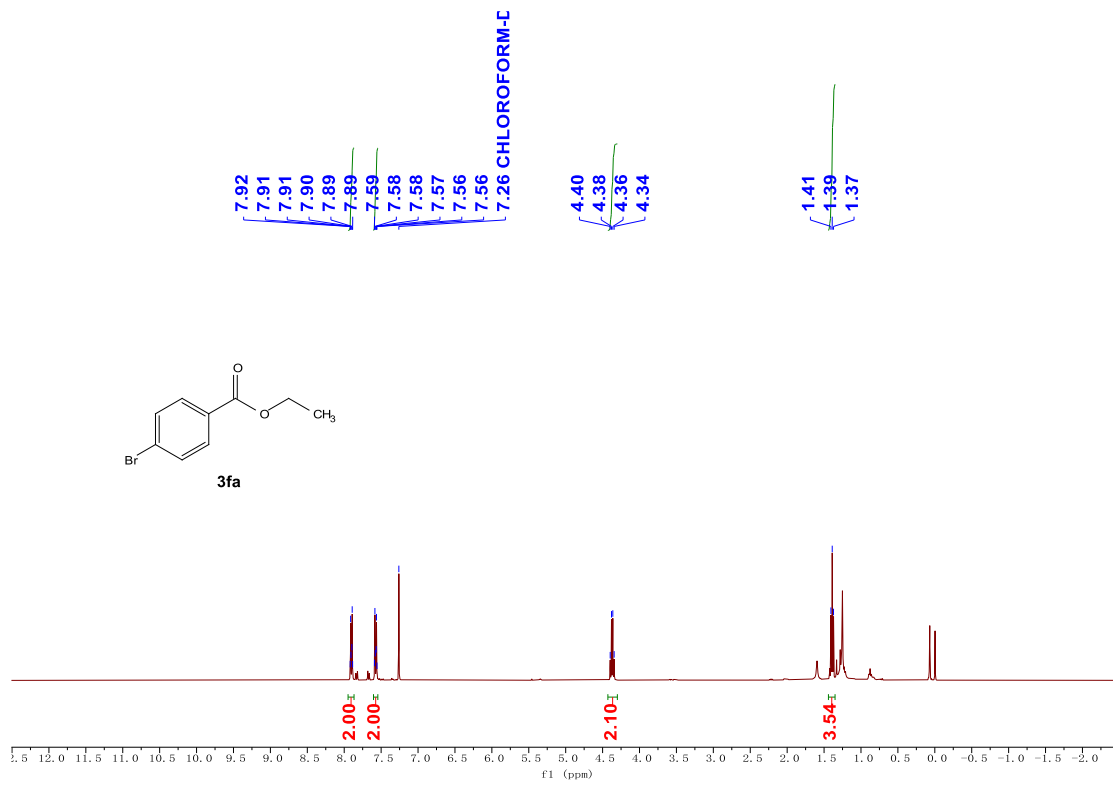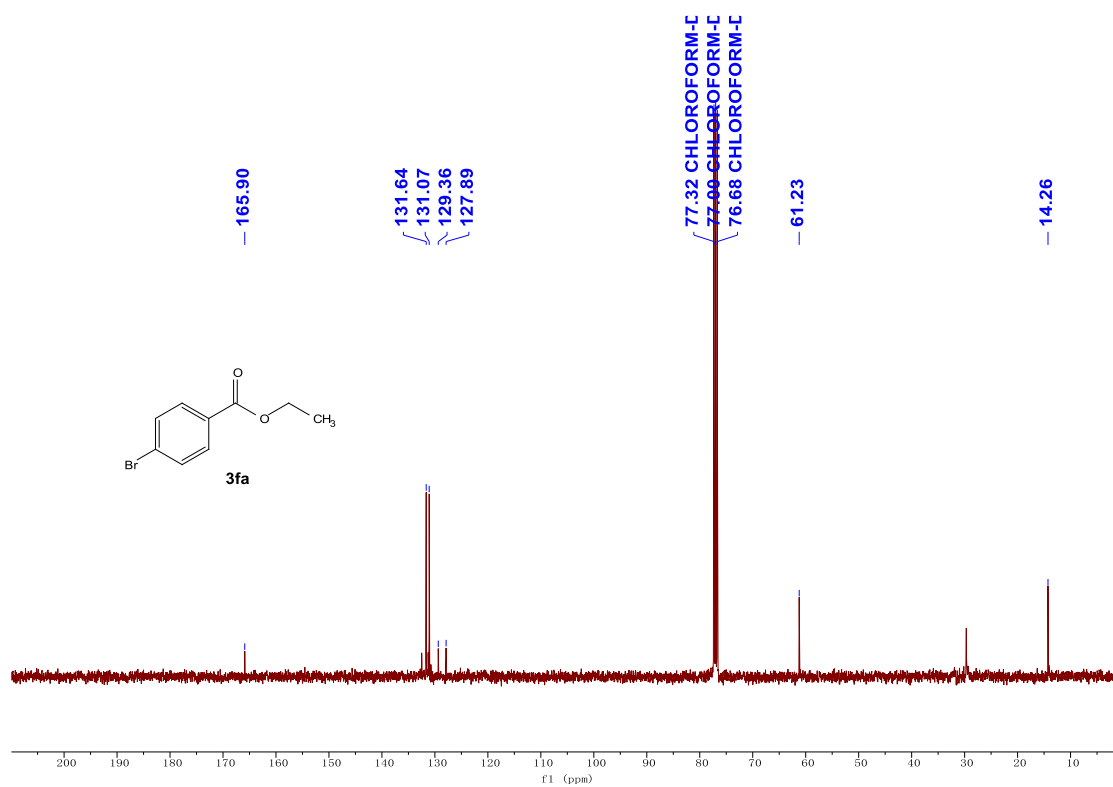

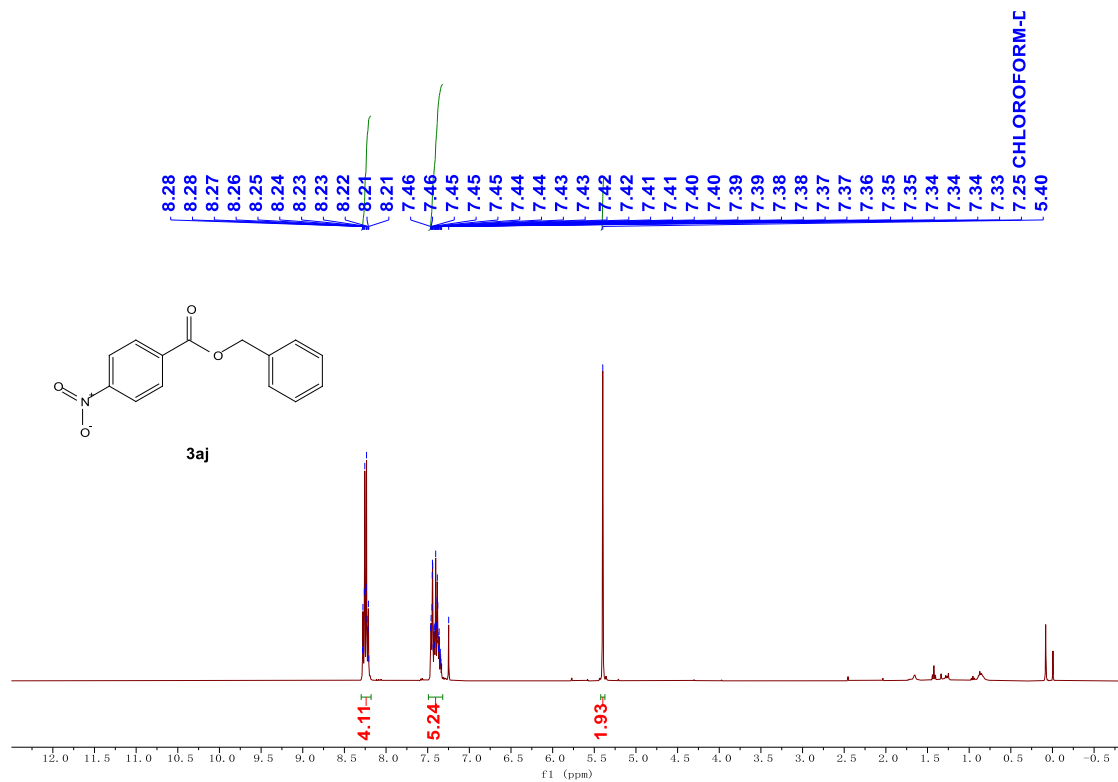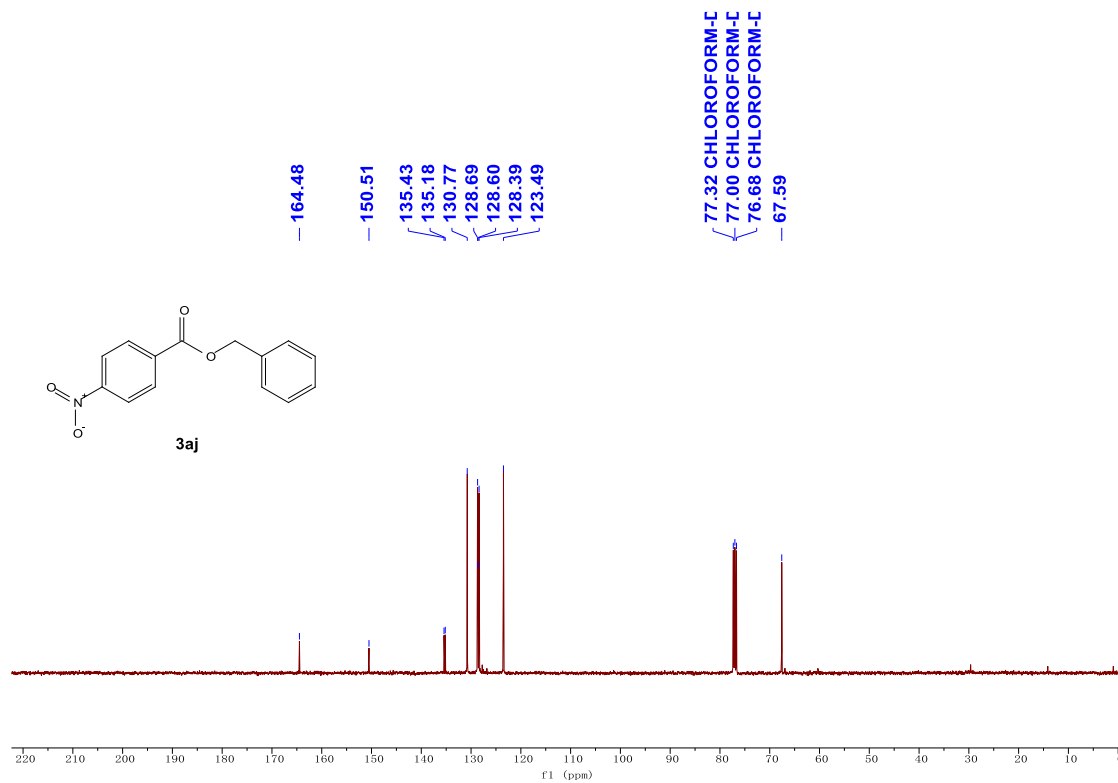

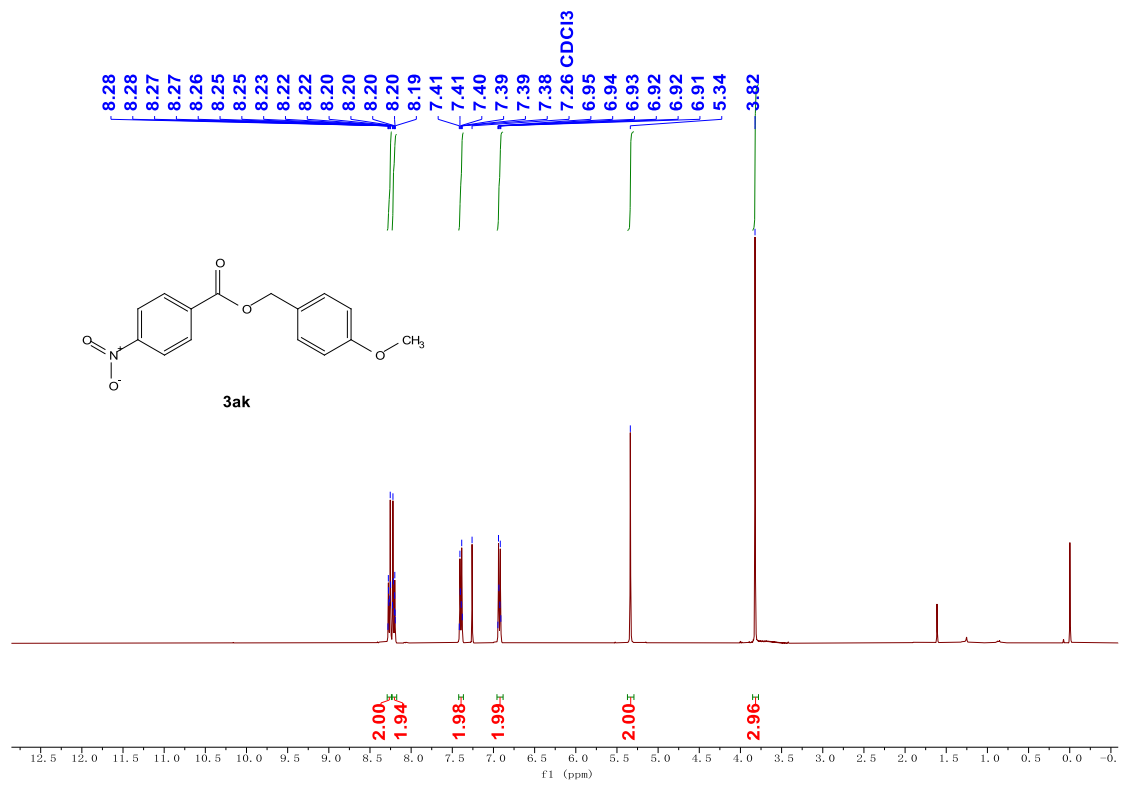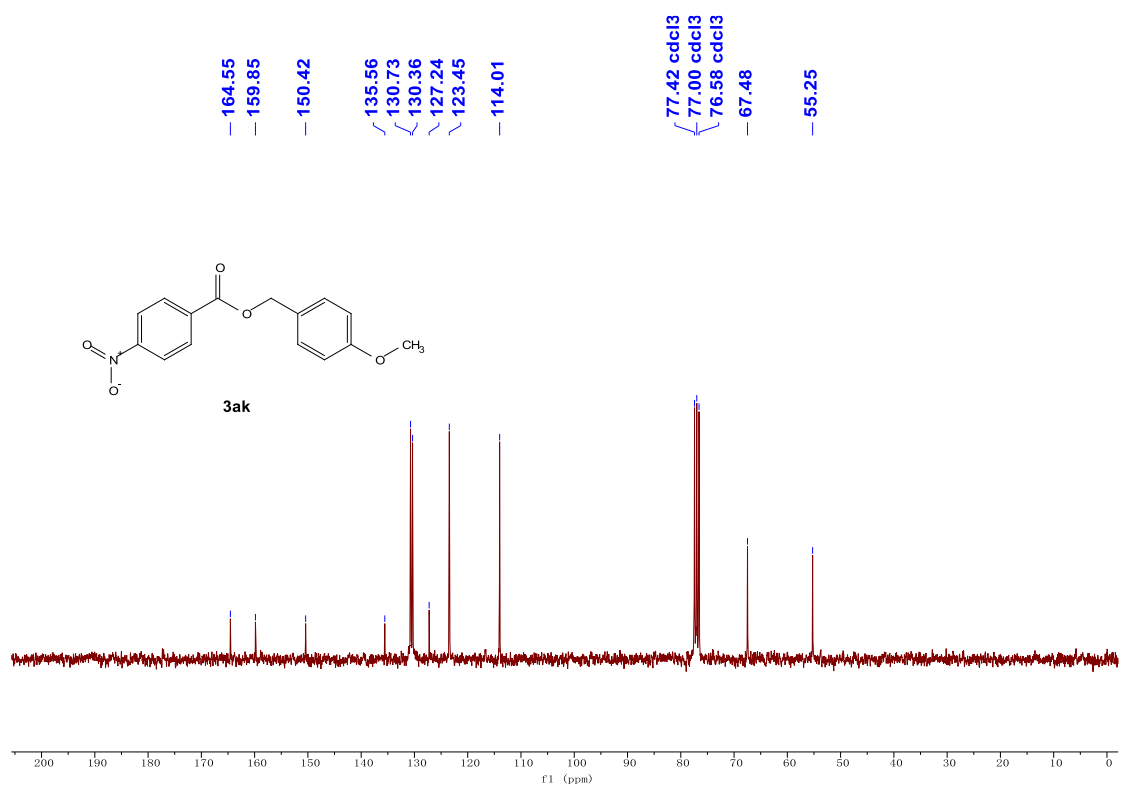

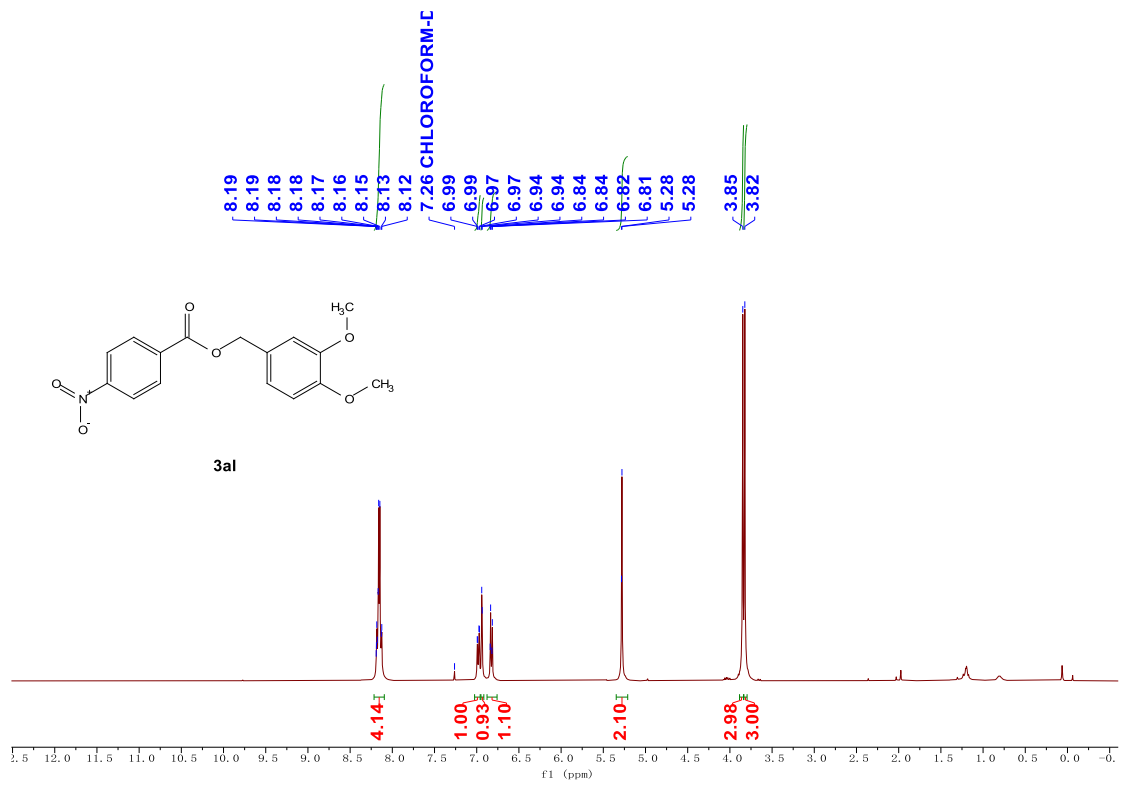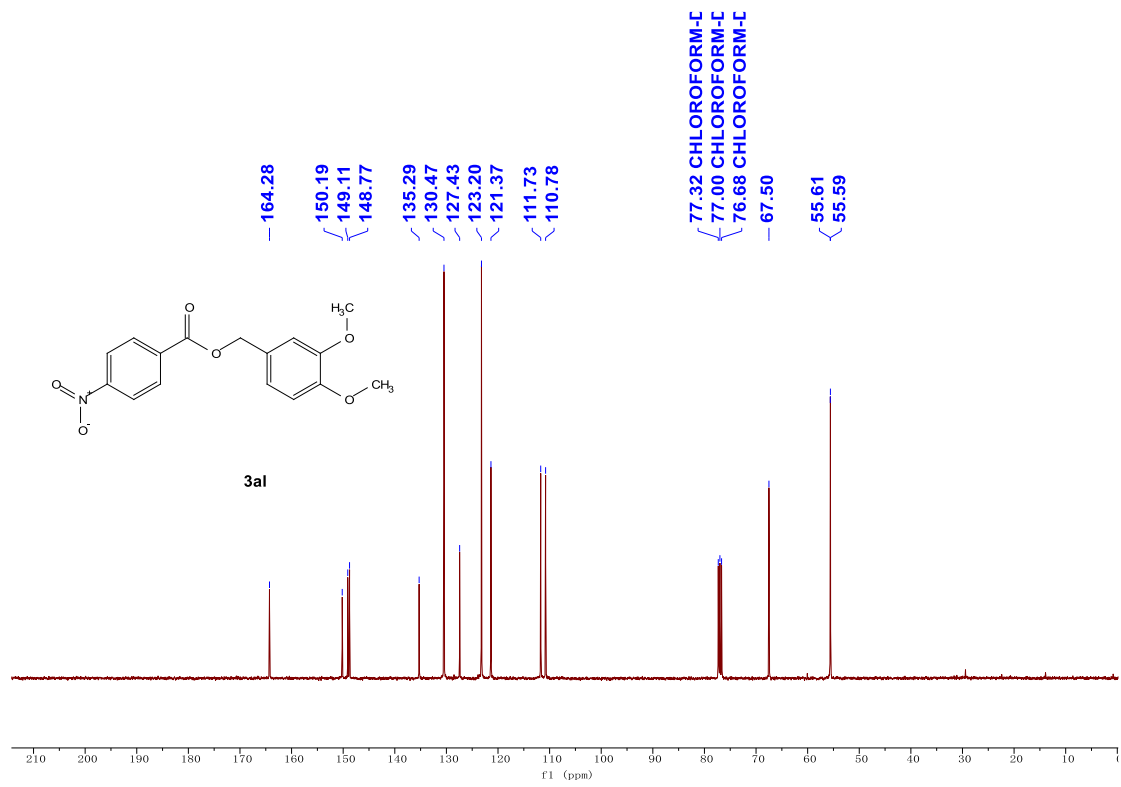

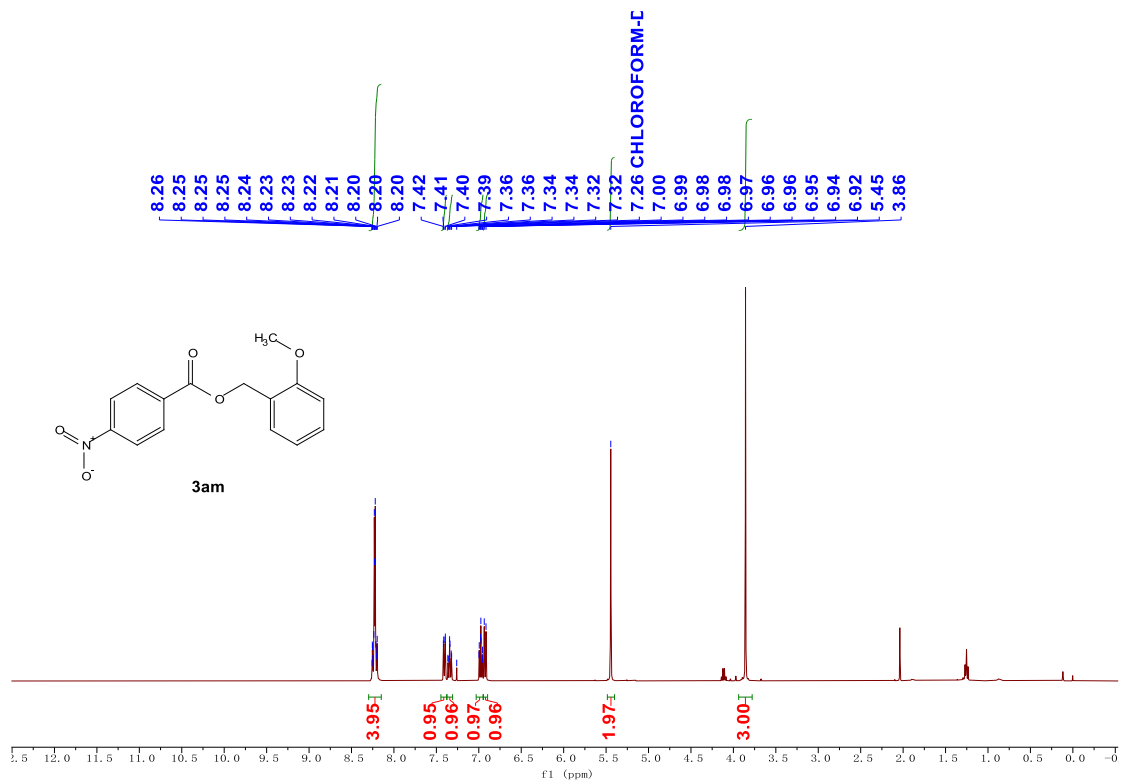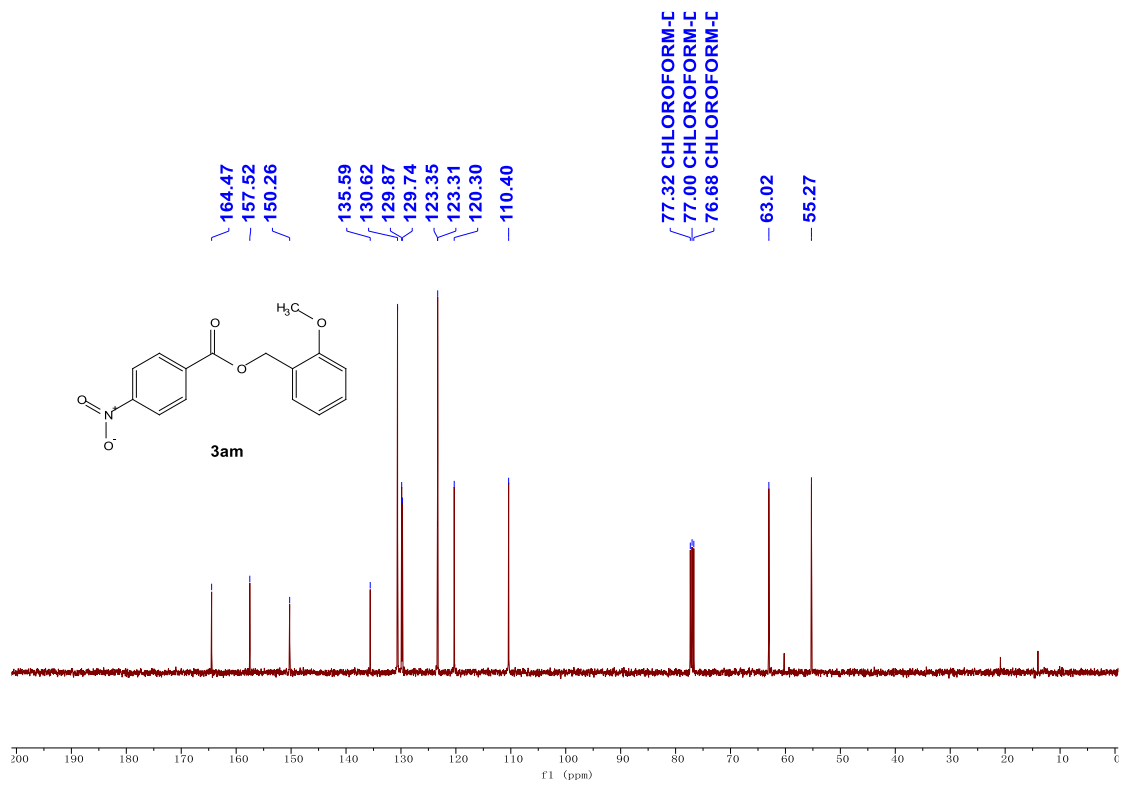

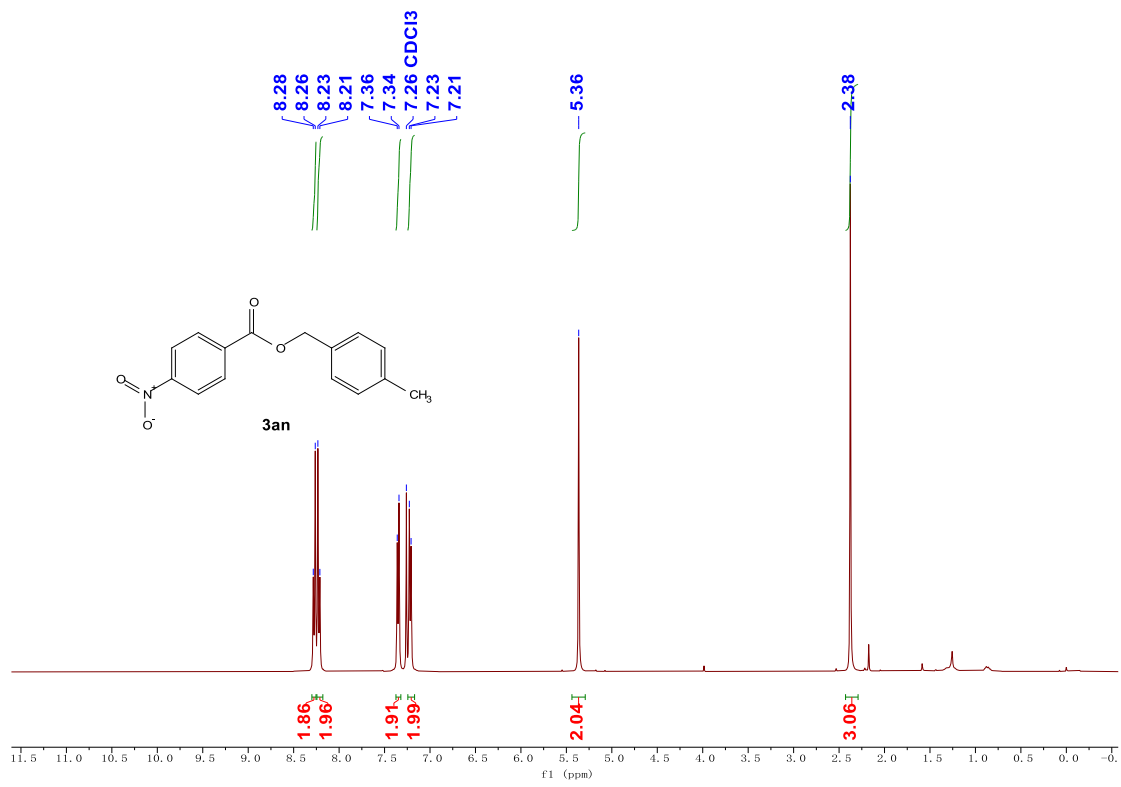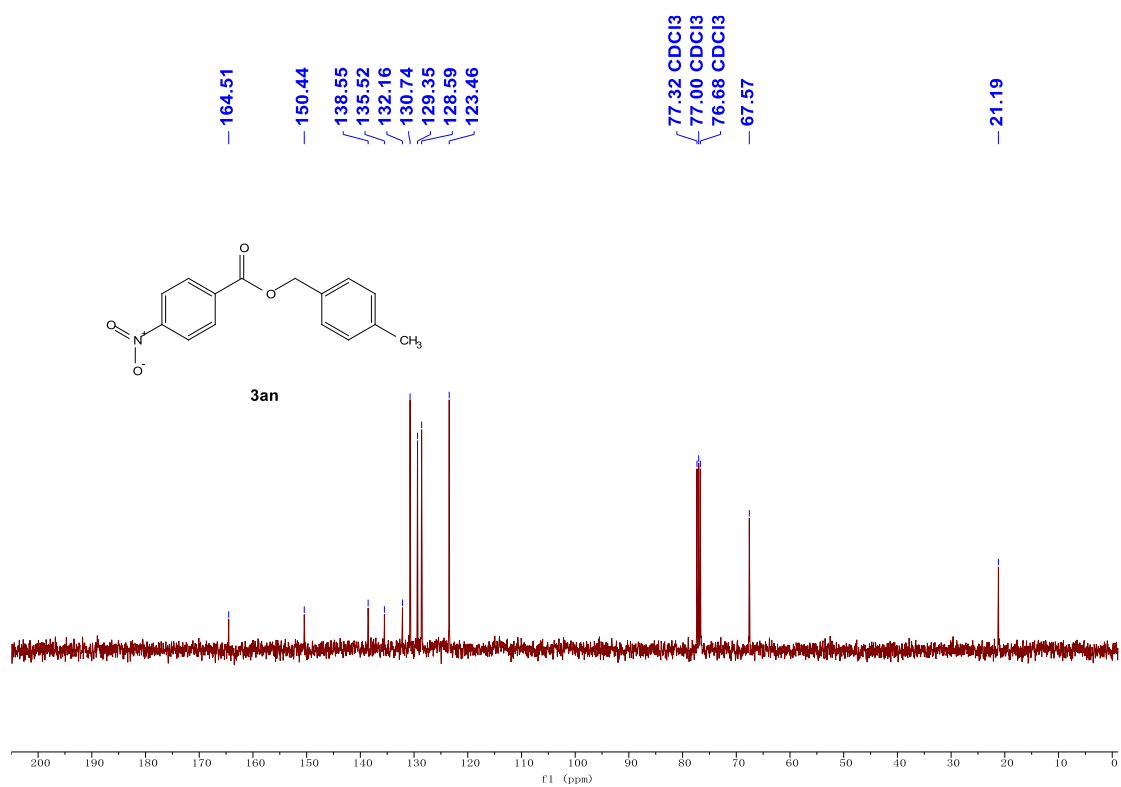



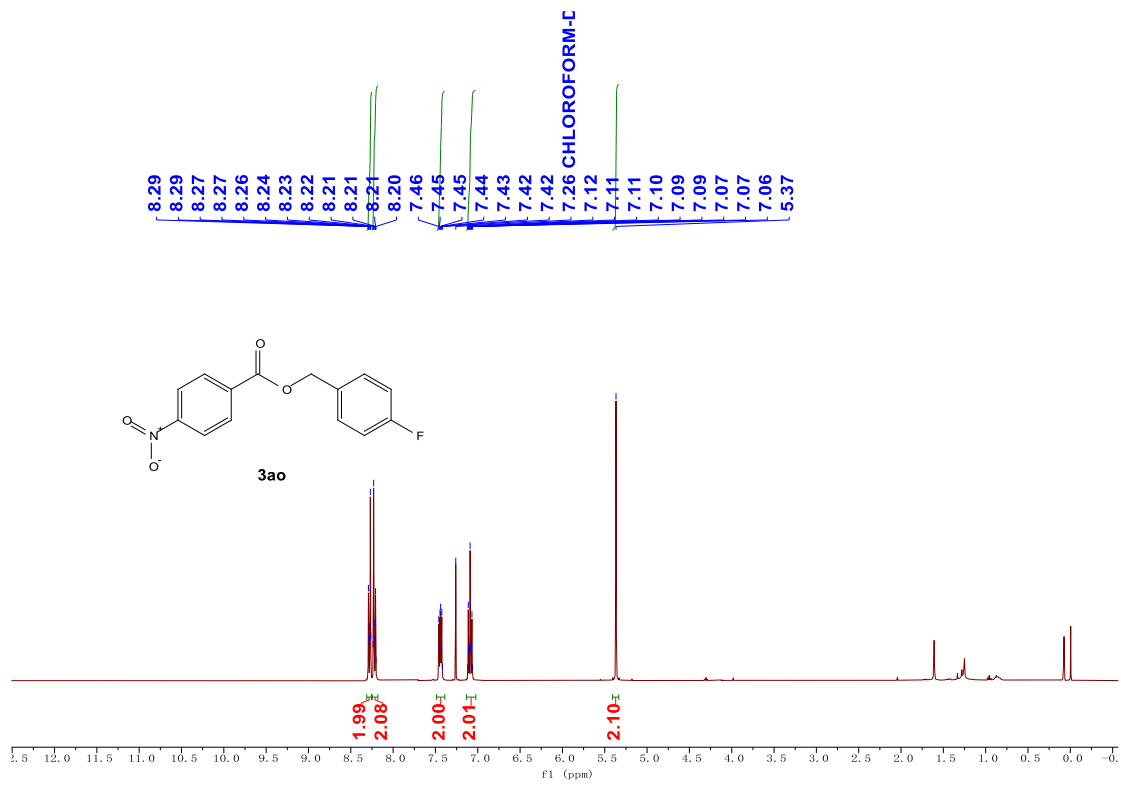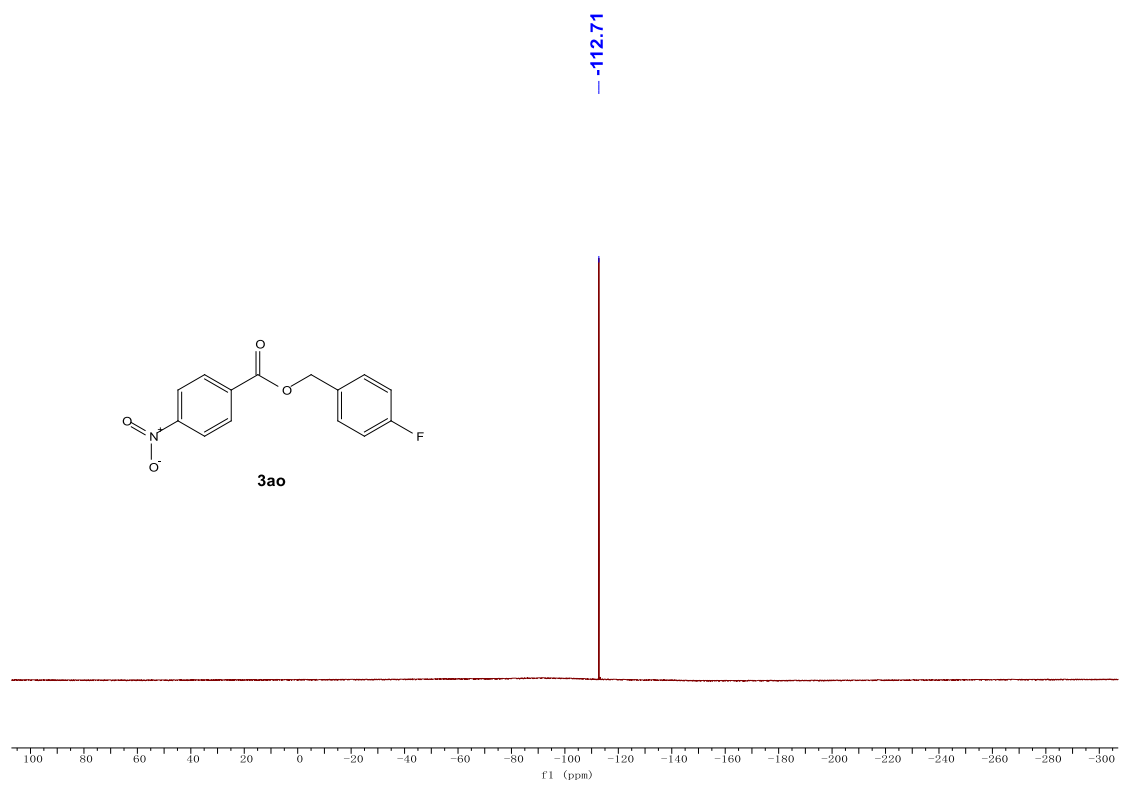

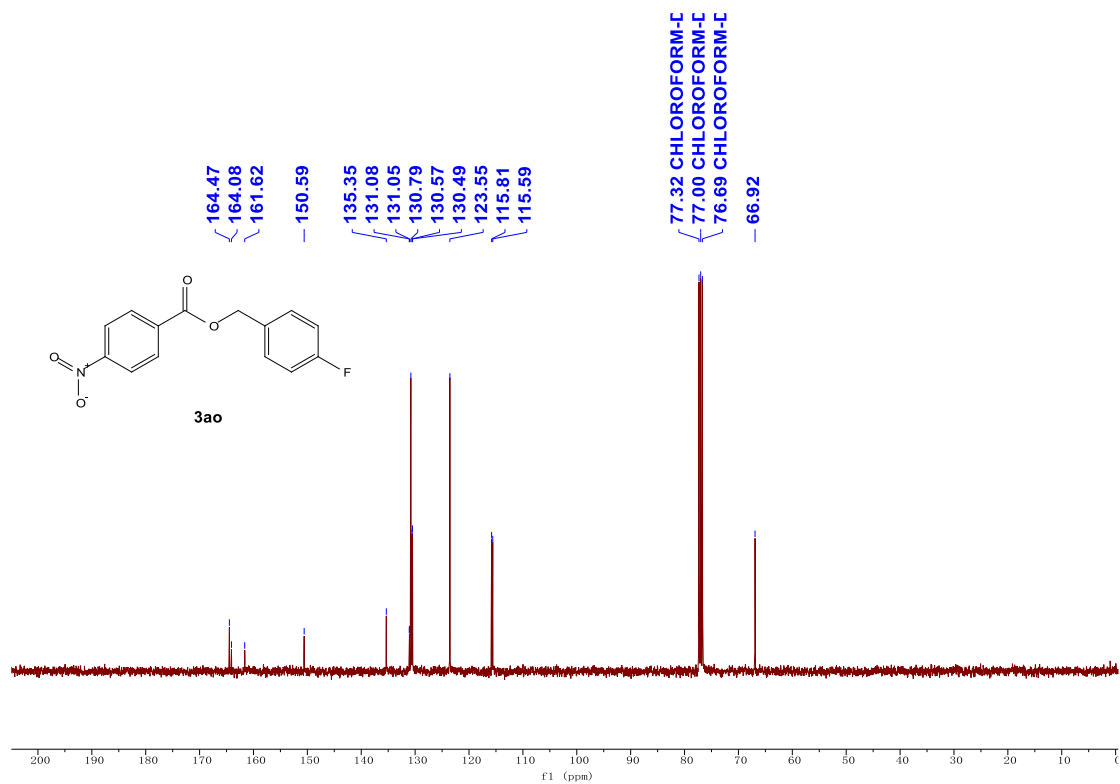

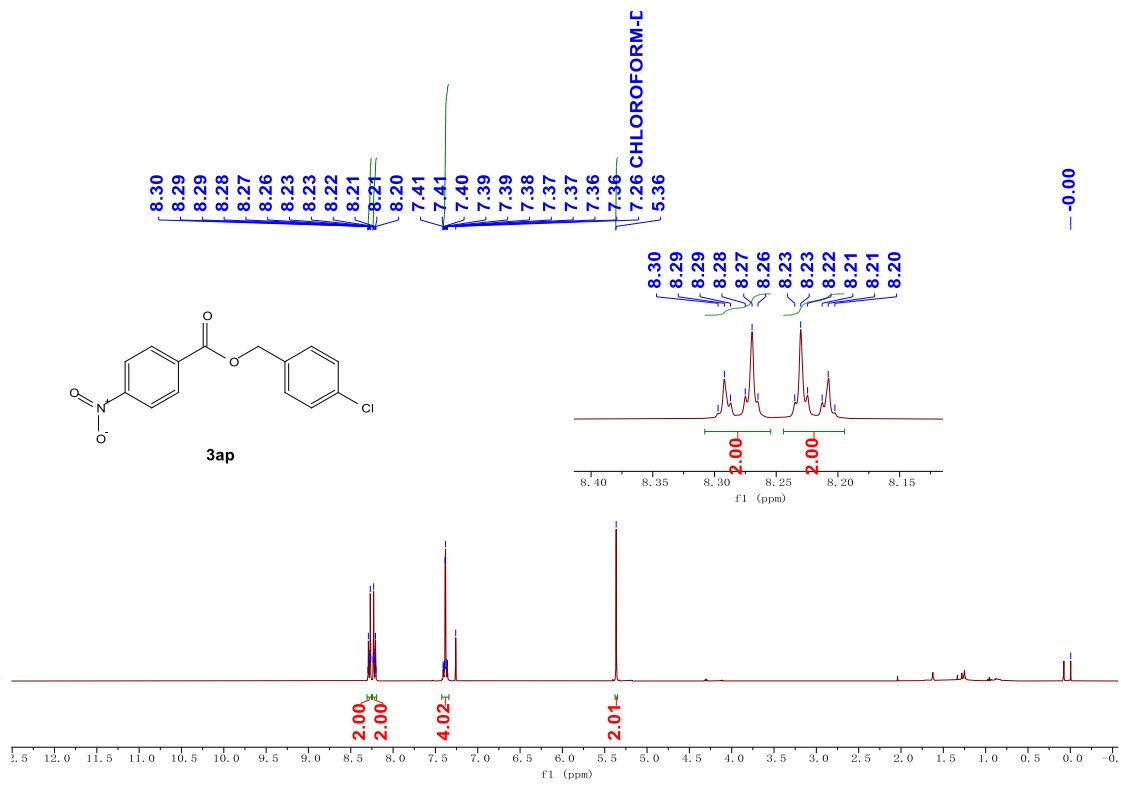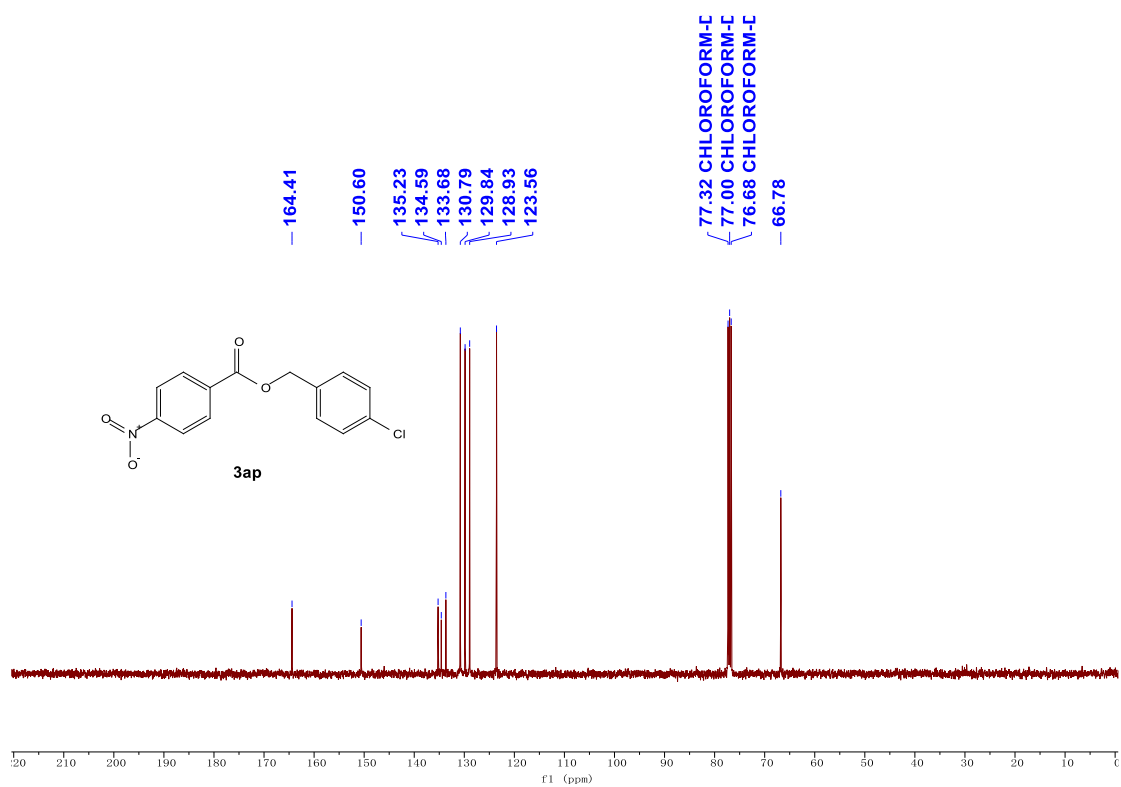

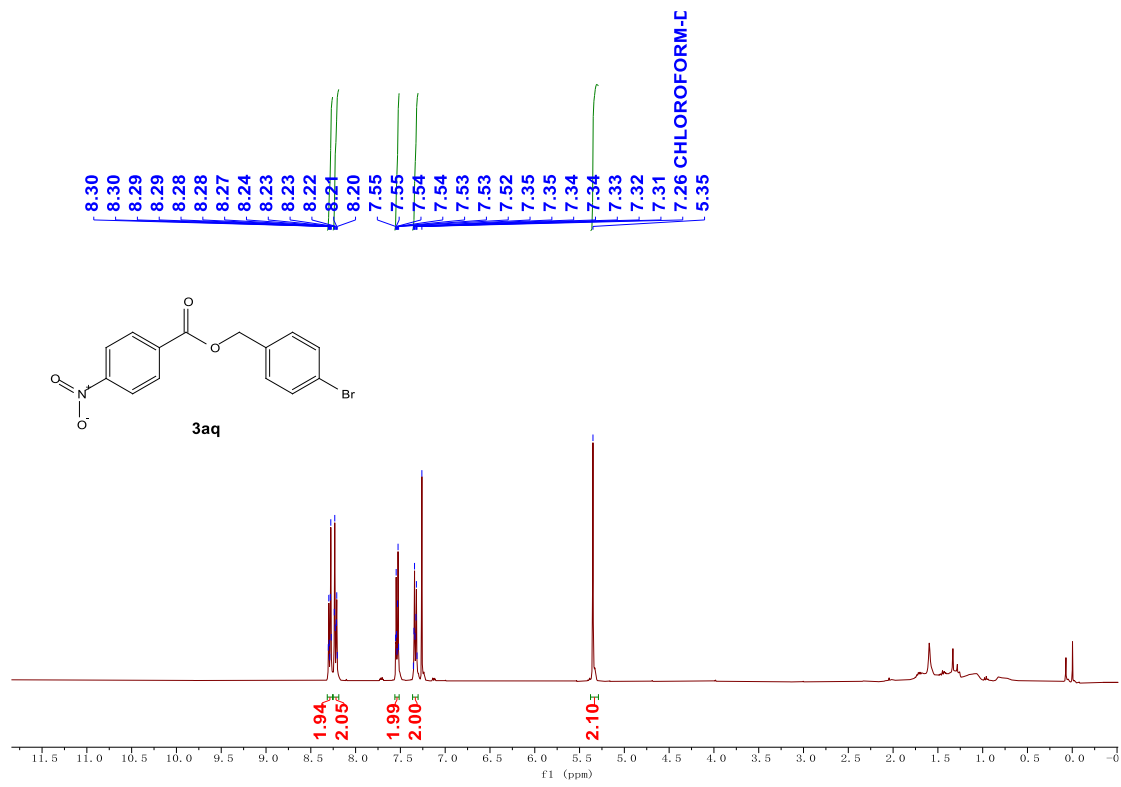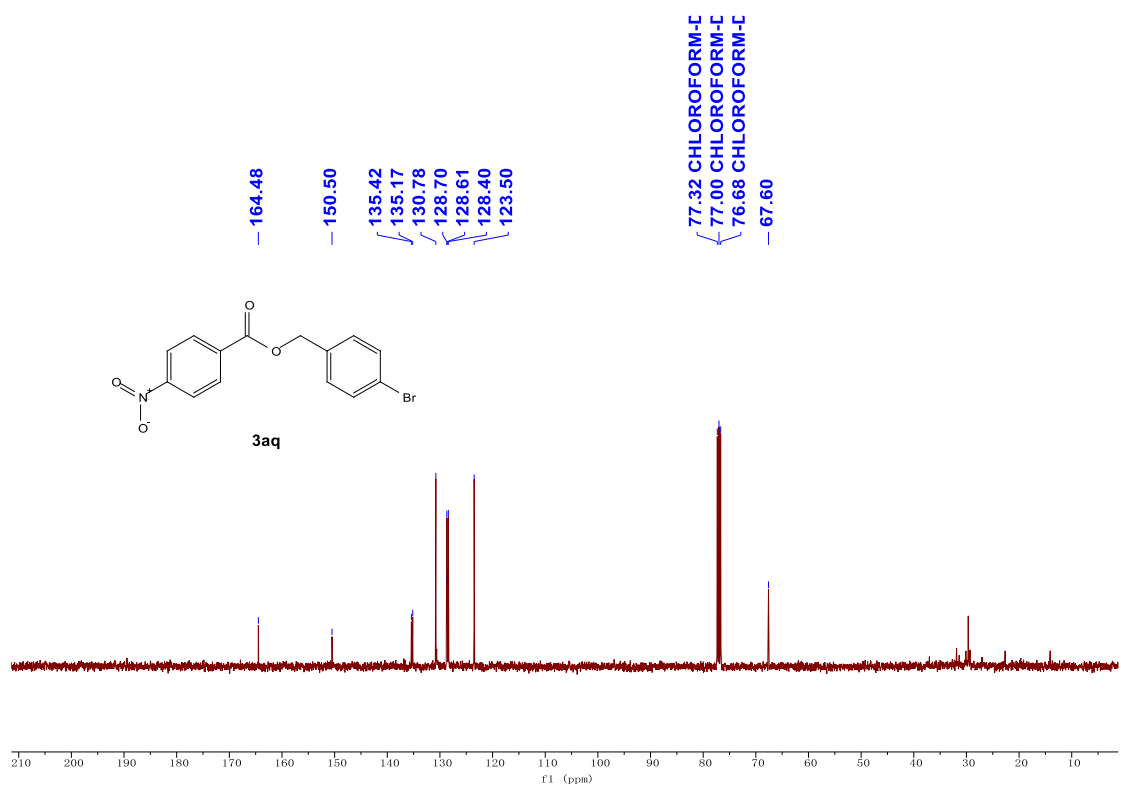

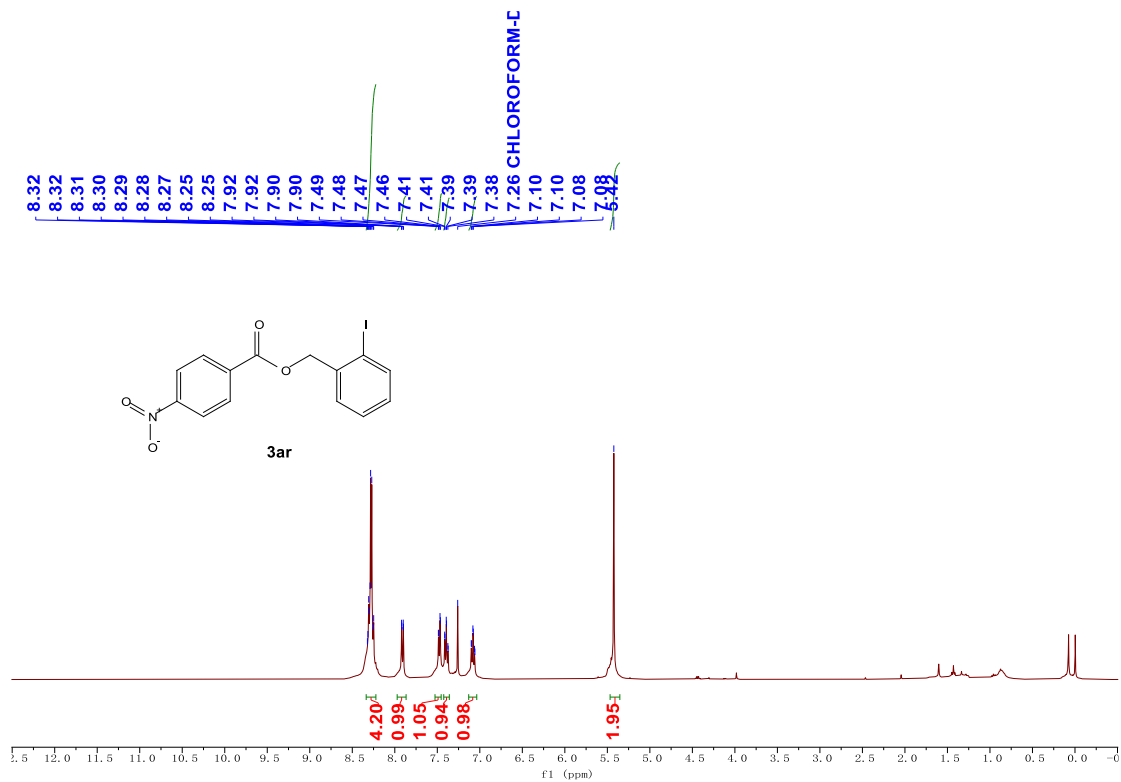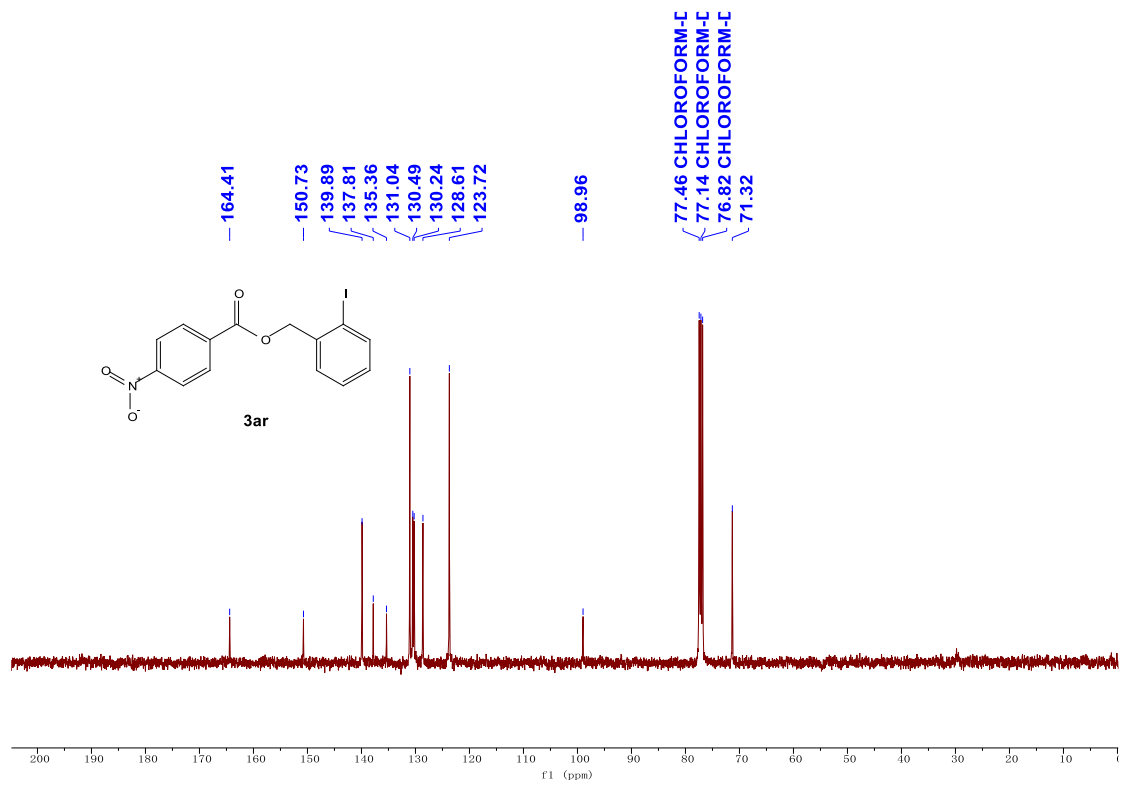

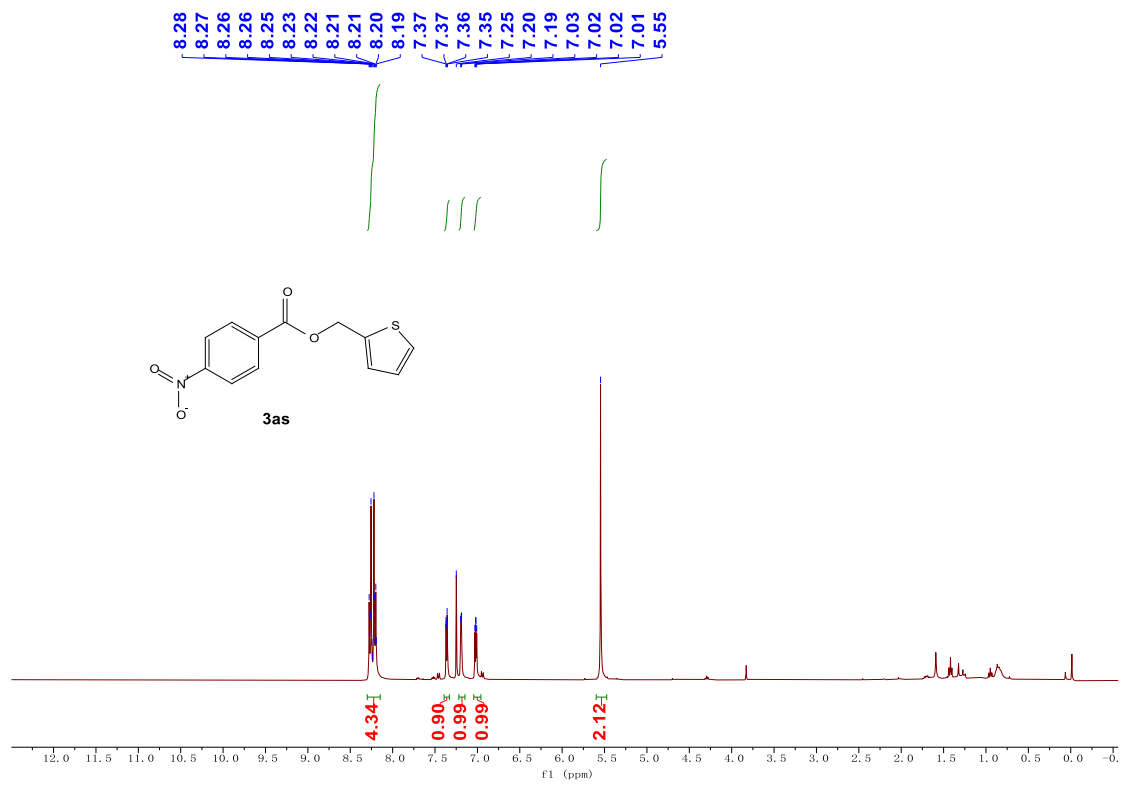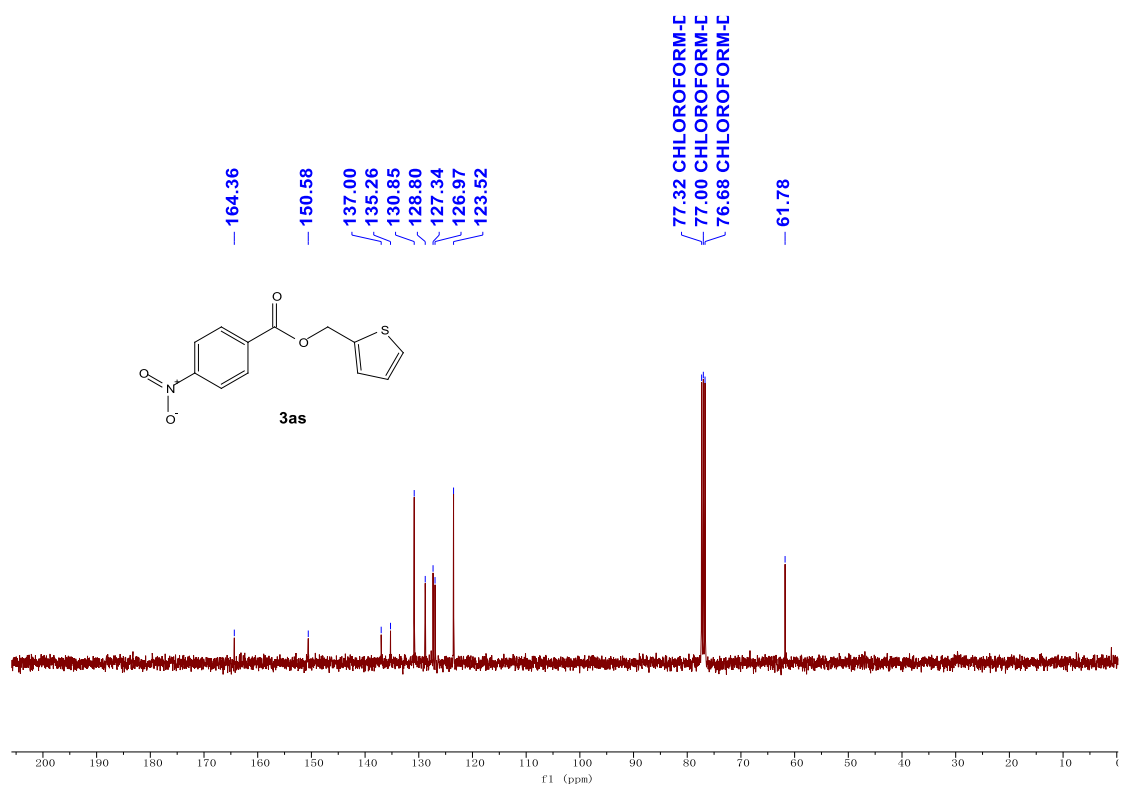

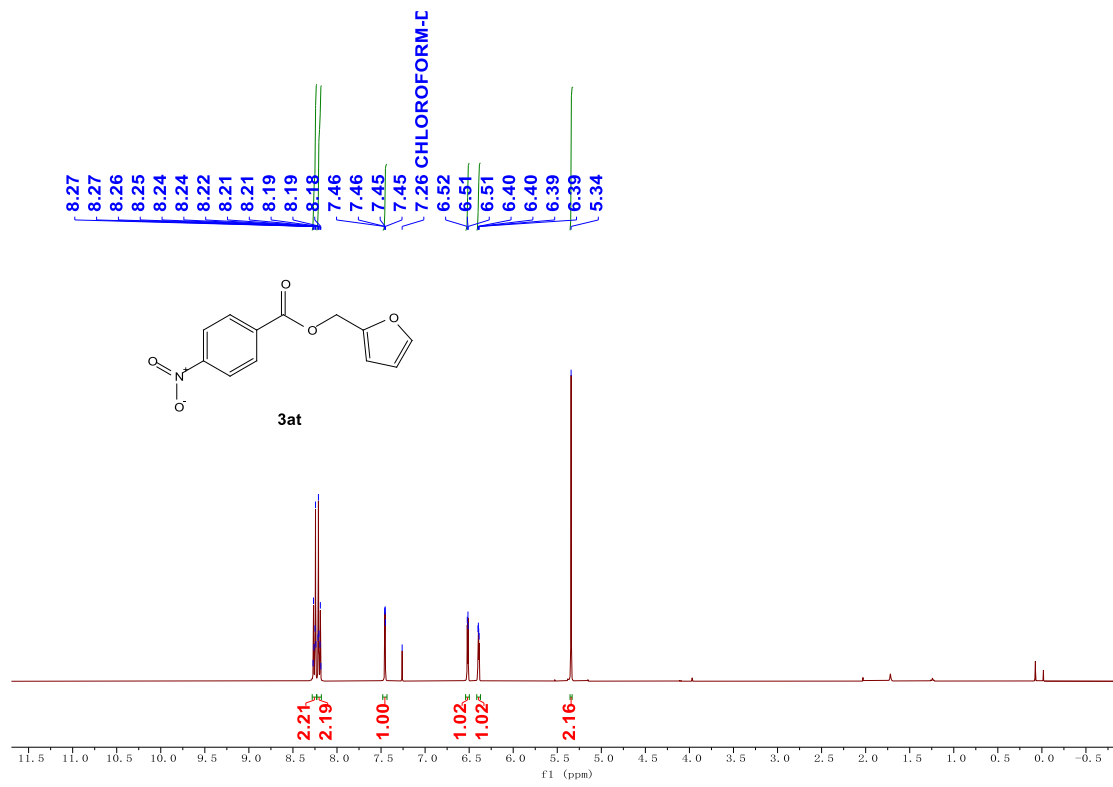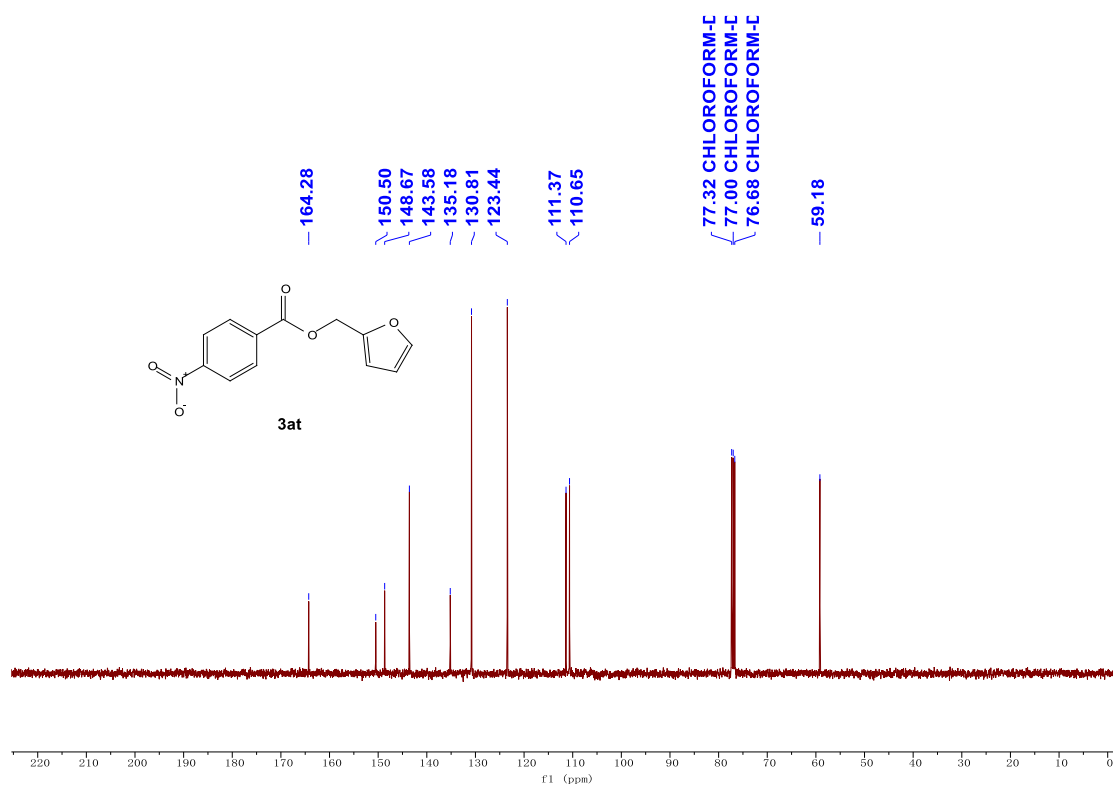

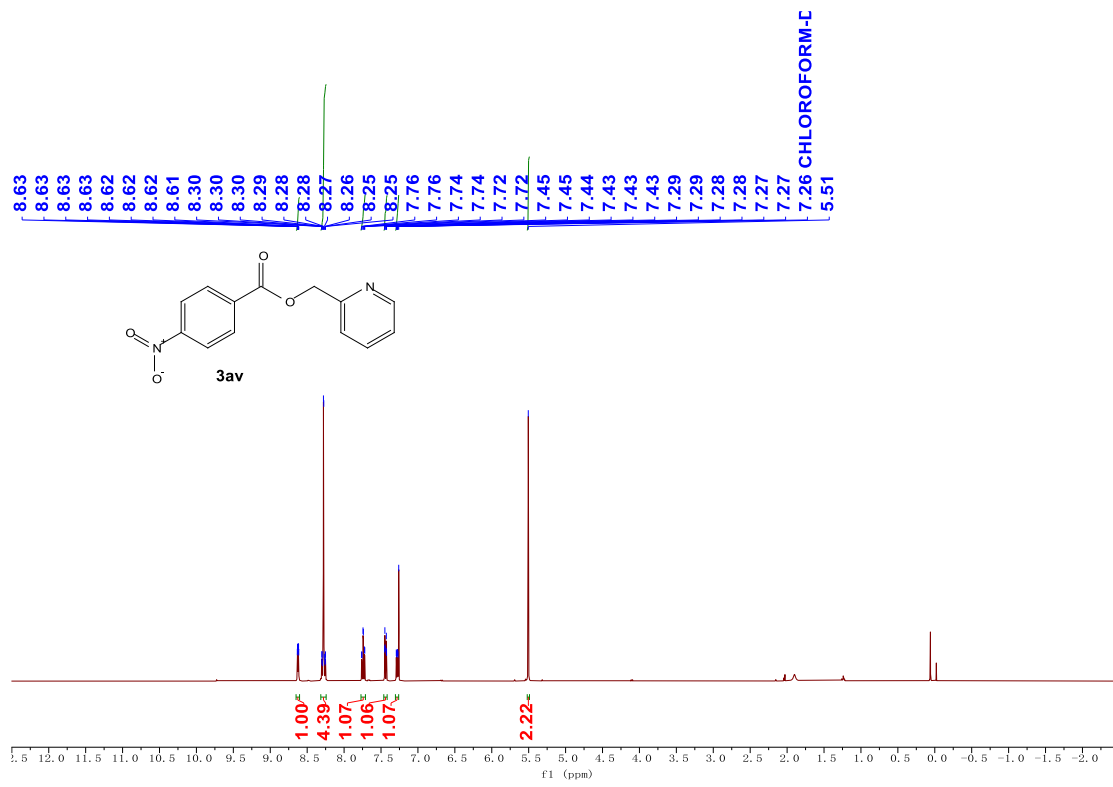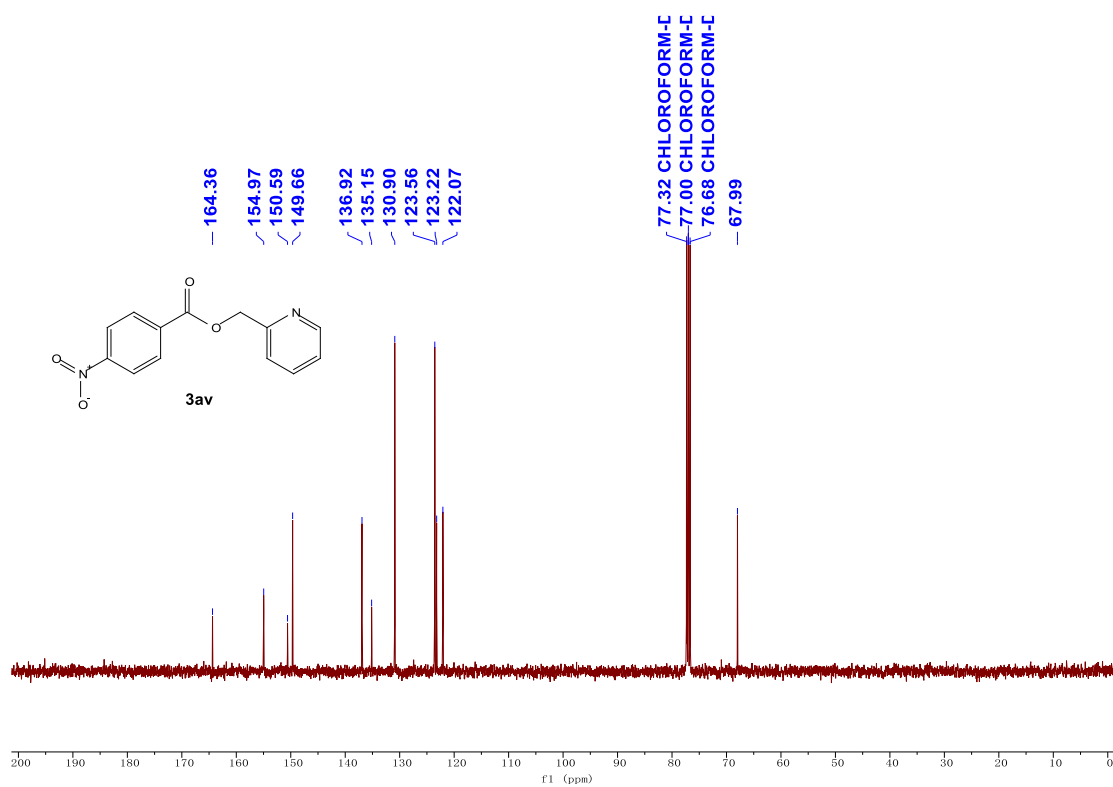



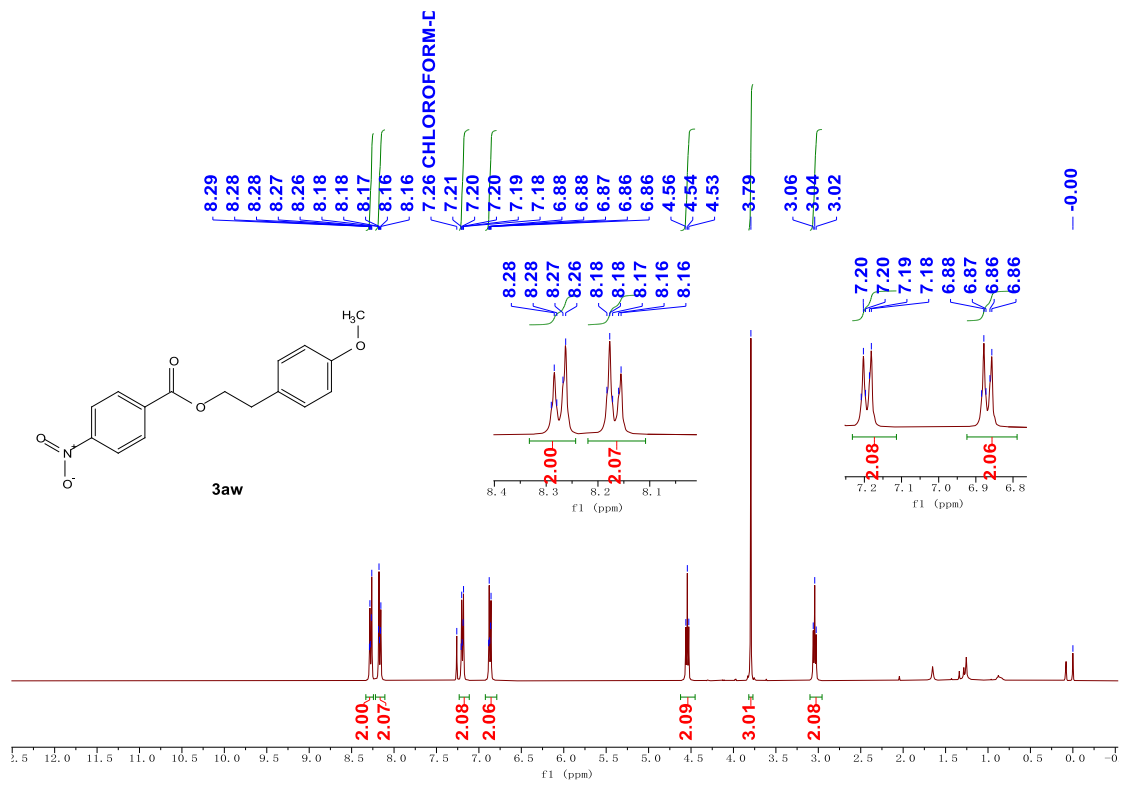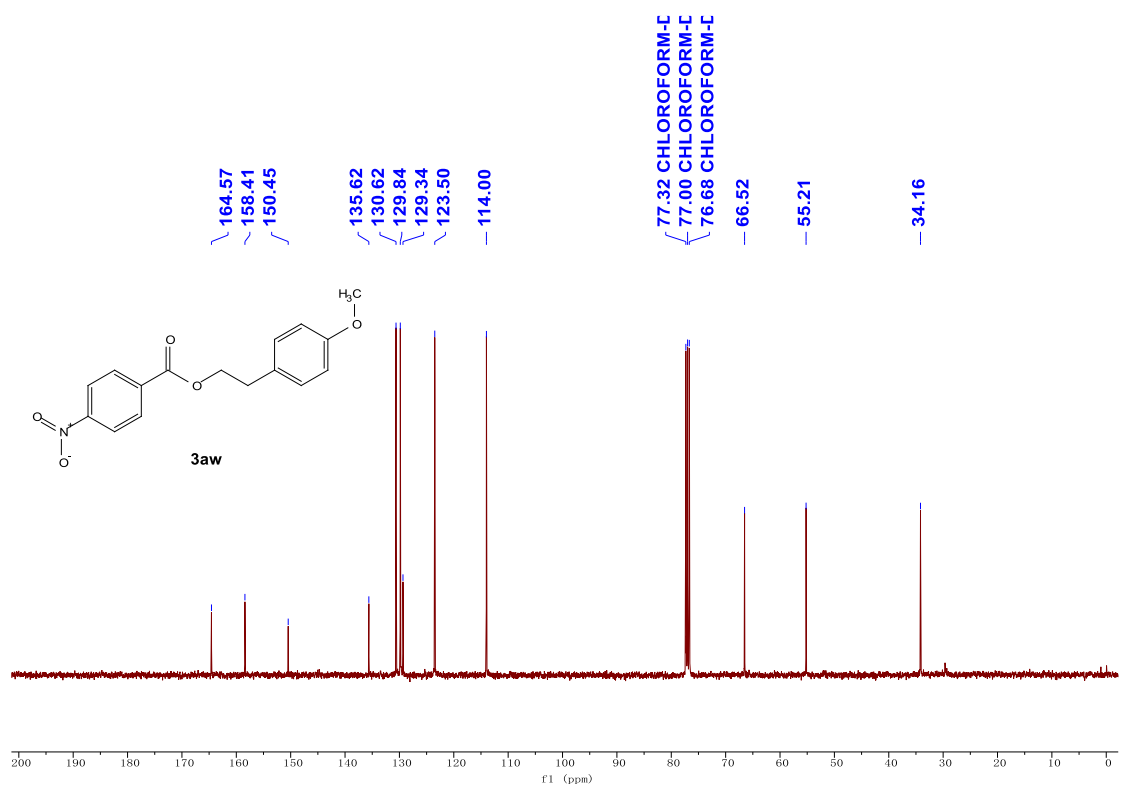

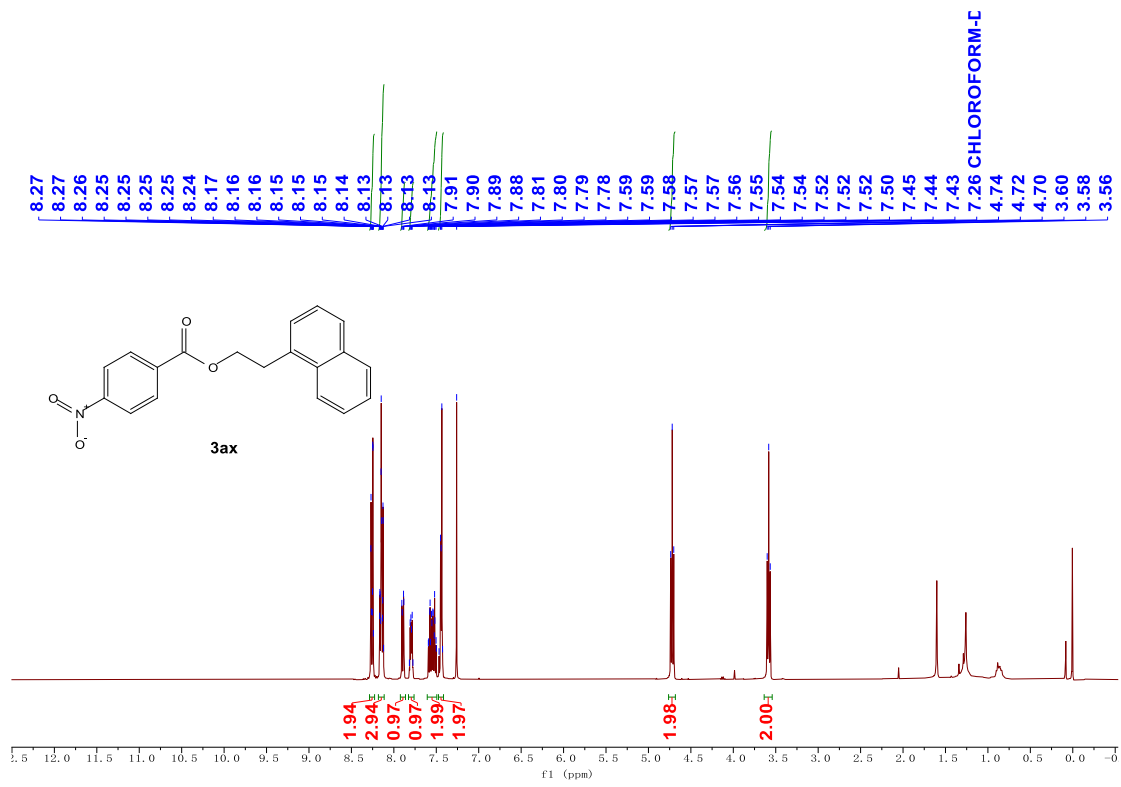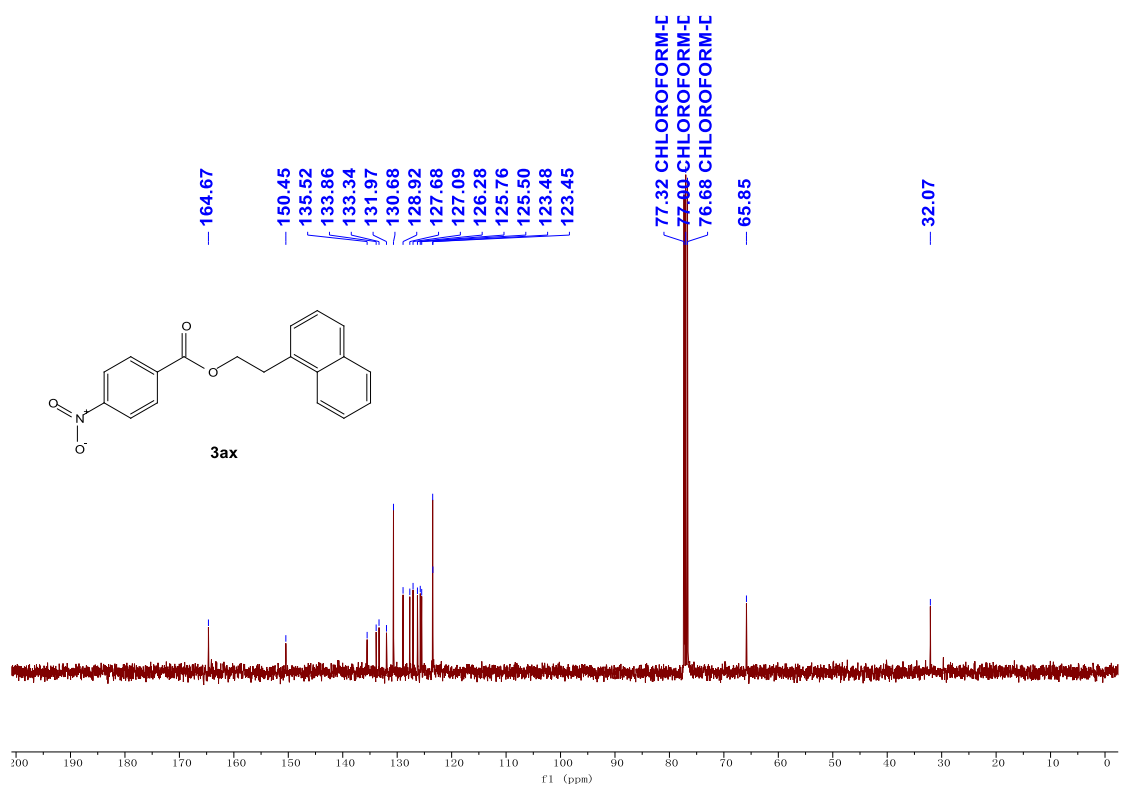

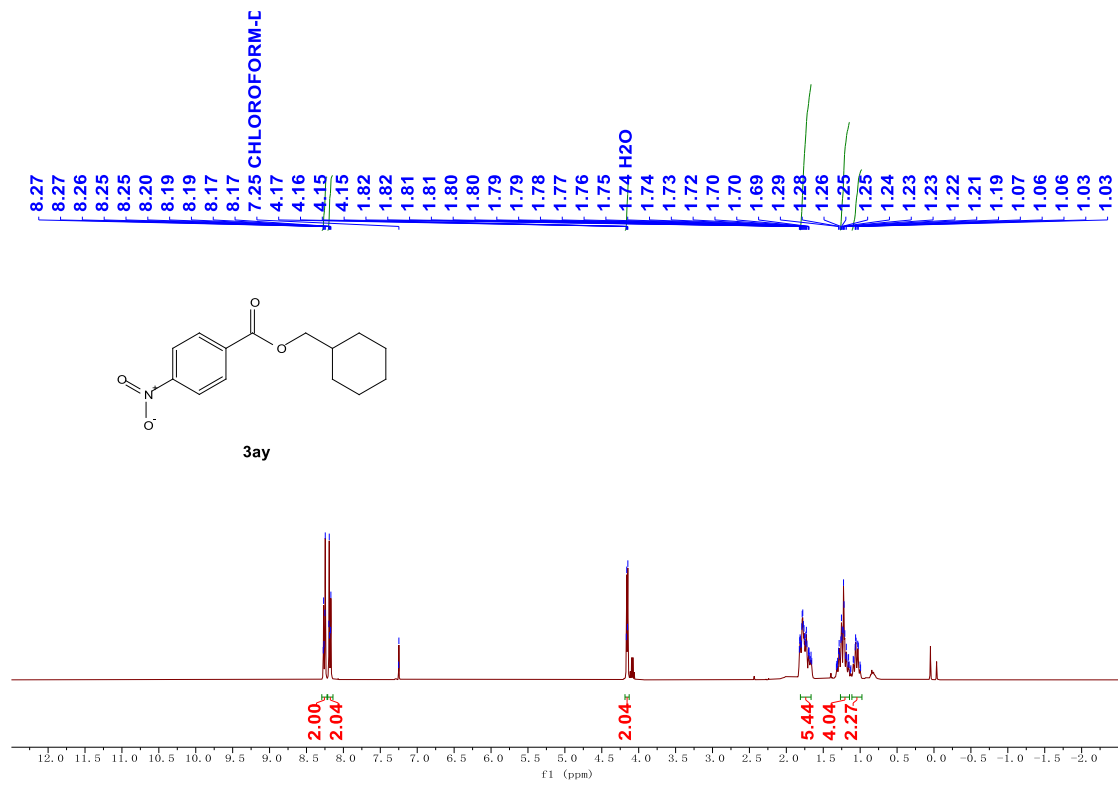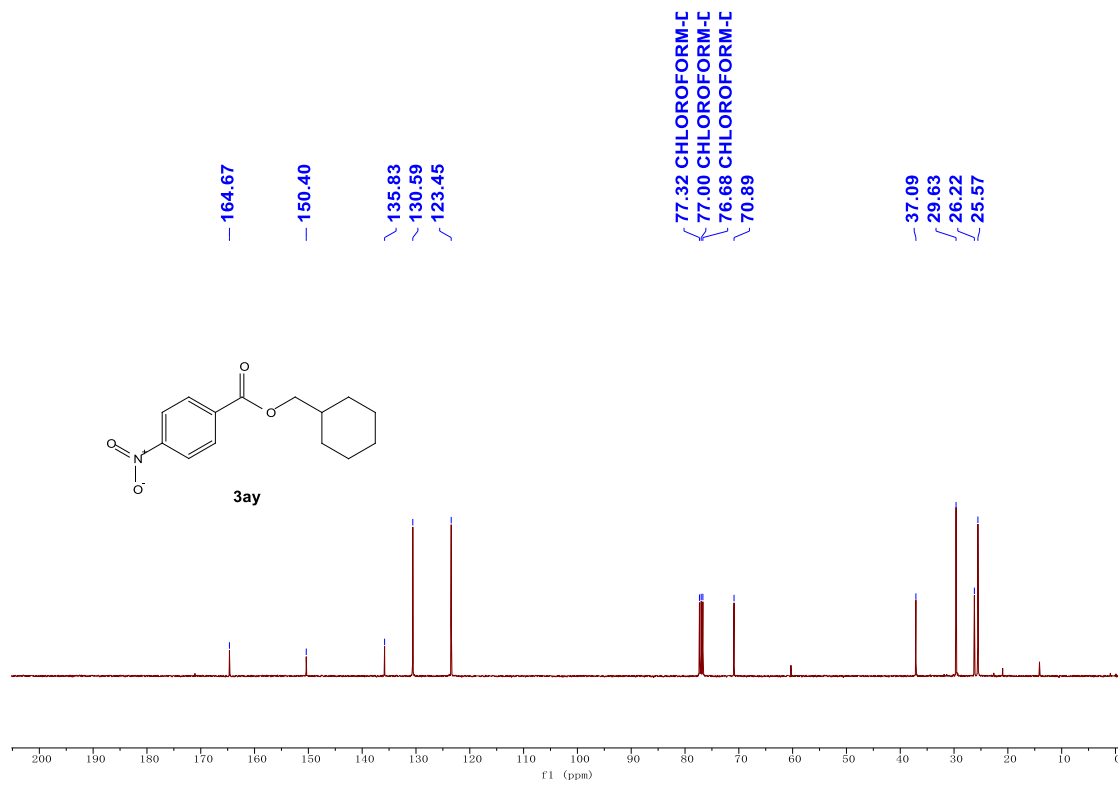

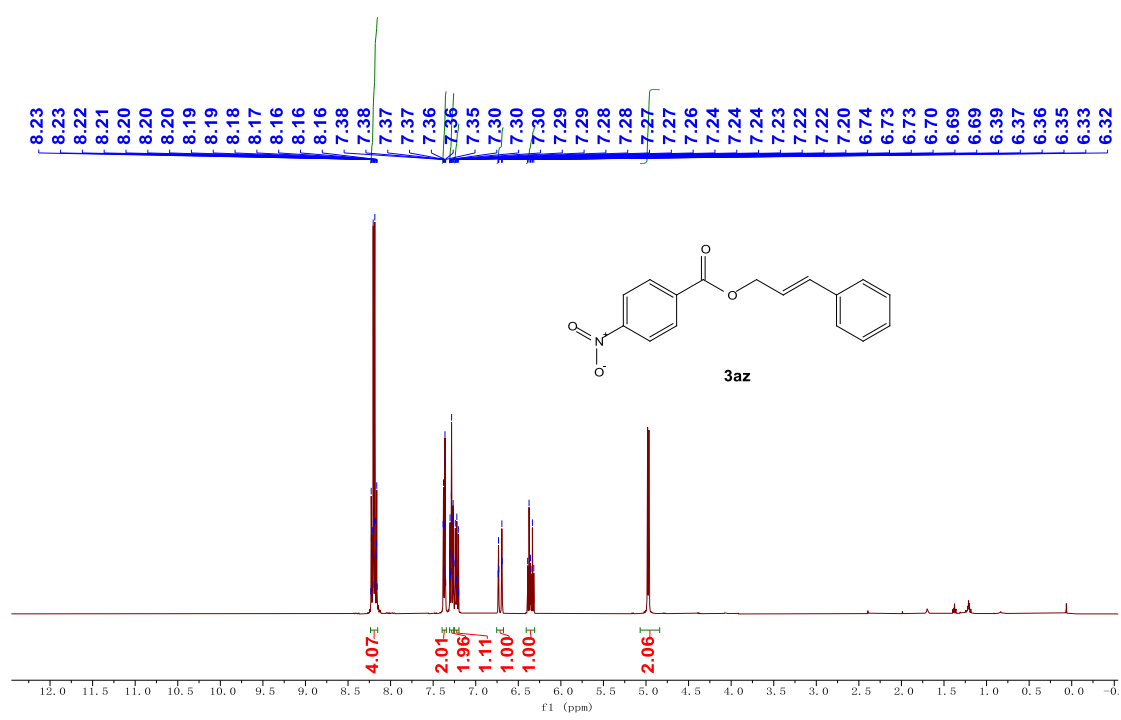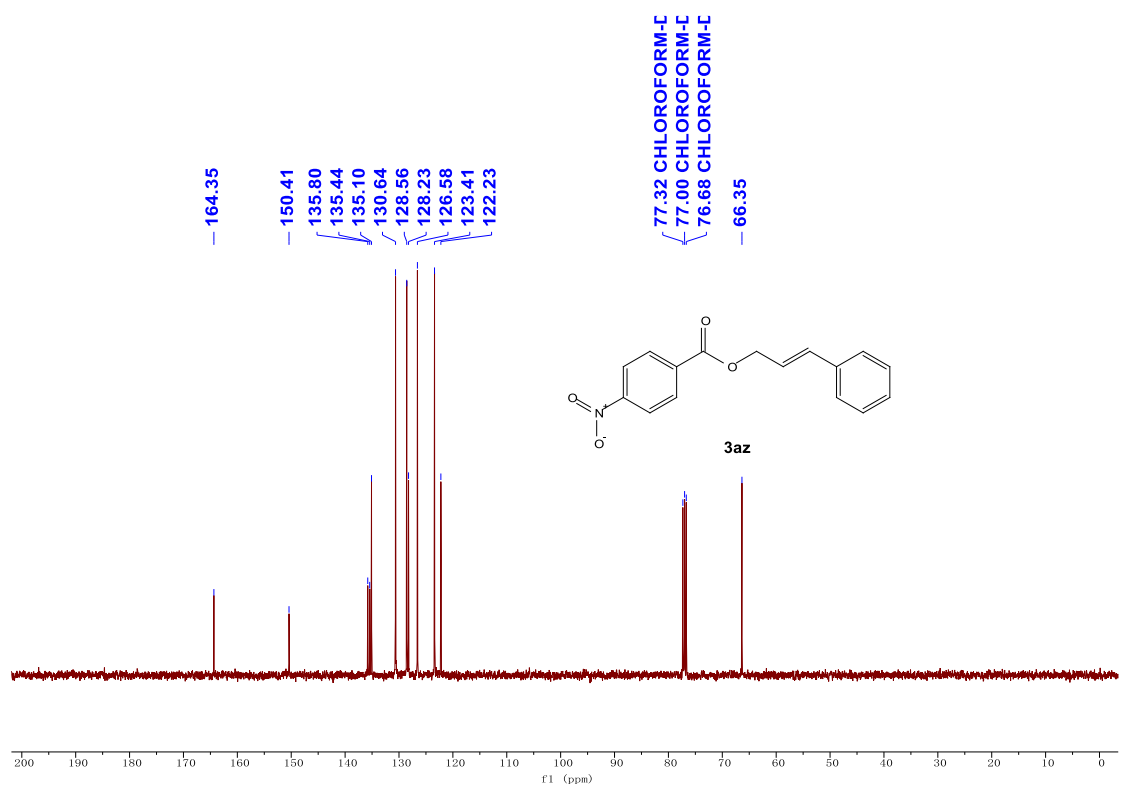

Supplement: d1ra05134b1.pdf [file d1ra05134b1.pdf]
